# Supplementary material
Source: publisher figshare collection journal article supplement (https://gsapubs.figshare.com/articles/dataset/_/12541019)
Supplement: Supplementary file 1 [file 1]

## Sheet: Sheet1
Barham et al Supplementary Data Table DR1 - Detrital zircon age data sorted according to geographic region
Data are age sorted and given in Ma as 206Pb/238U ages for grains younger than 1500 Ma and 207Pb/206Pb ages for grains older than 1500 Ma (Spencer, C. J., Kirkland, C. L., and Taylor, R. J. M., 2016, Strategies towards statistically robust interpretations of in situ U–Pb zircon geochronology: Geoscience Frontiers, v. 7, no. 4, p. 581-589.)
AFR = Africa; SAM = South America; PAC_NZ = Pacific region and New Zealand; NAM_CA = North and Central America; EUR = Europe; AUS = Australia; ANT = Antarctica; GRN = Greenland
AFR	1σ	SAM	1σ	PAC_NZ	1σ	NAM_CA	1σ	INDIAN	1σ	EUR	1σ	AUS	1σ	ASIA	1σ	ARAB	1σ	ANT	1σ	GRN	1σ
3.4	0.3	18	1	89.54	3.13	0.1	0.3	13.5	0.5	22.66	0.22	4	123	10.9	0.3	102.2	3.5	100.1	2.2	37	1
3.9	0.2	26.3	1.2	90.52	2.22	0.1	0.3	14	1	22.97	0.21	18.1	1.1	11.4	0.8	107.2	2.4	101.7	3	162	4
118.1	1.5	33.9	0.3	91.04	2.91	0.1	0	15	0	23.28	0.18	21.9	1.2	12.7	1.2	120.5	4.1	123	2	214	3
129.4	2.7	35.1	0.6	91.46	3.52	0.3	0	16	0	23.34	0.22	26.5	0.6	14.7	0.3	122.3	3.4	136.7	8.1	235	5
135.1	1.9	35.4	1.65	91.71	3.21	0.3	0.39	17	1	23.39	0.2	34.4	1.2	15	1.5	124.6	3.7	163	1	247	5
146	6.5	36	2	91.76	4.7	0.4	0.4	20	1	23.4	0.22	88	7	15.6	1.4	124.8	6.4	165.5	3.2	250	4
154.5	2.6	36.1	0.55	91.84	3.97	0.4	0.1	20	1	23.62	0.22	91.98	6.13	15.7	6.5	126	5.1	166.5	10	250	3
161.5	3.6	36.7	1.25	92.1	3.06	0.4	0.1	23.9	3.2	23.74	0.22	94.1	2.9	15.8	0.8	128.3	3.7	167	1	254	4
162.6	5.1	37.6	0.5	93.17	3.24	0.4	0.1	25	1	24.08	0.22	95	5	16.5	0.2	128.3	3.6	167.6	4.1	263	7
163.6	2.2	38.4	0.85	93.19	3.22	0.4	0.1	26	1	24.31	0.21	95	6	17.2	0.5	128.3	2.9	168	1	277	4
164.8	2.2	38.6	0.4	93.83	3.17	0.5	0.3	26	1	24.37	0.22	96	3	17.2	0.2	128.6	6.1	168	1	282	7
168.6	3.1	39.8	0.3	94.04	3.39	0.5	0.1	26	1	24.67	0.25	97	3	17.2	0.3	128.8	5.7	169	1	284	8
169.5	2.5	65.6	3.5	94.34	5.23	0.5	0.2	26	1	24.75	0.25	99	4	17.3	0.5	130.5	4.2	169	1	285	3
169.5	2.5	68	5	94.79	2.75	0.5	0.1	26	1	25.15	0.28	100	20	17.5	0.7	130.7	1.3	170	1	286	4
169.5	2.9	71	4	95.33	4.21	0.5	0.2	27	1	25.56	0.27	100	2	17.7	0.2	130.7	2.2	170	1	297	5
170.7	3.3	72.1	1.8	95.35	3.96	0.5	0	27	1	25.81	0.3	100.3	2.9	17.7	0.3	130.7	2.5	170.6	2.5	299	5
174.6	2.2	72.9	0.9	95.37	4.69	0.5	0.7	27	1	26.01	0.3	101	7	18	0.3	131.4	1.6	170.7	2.2	300	11
180.4	4.5	73	2	95.9	3.03	0.5	0.3	27	1	26.06	0.32	101.2	4.5	18.3	0.5	133.5	2.1	171	1	301	18
181.5	2.9	73.9	1.3	96.63	5.98	0.5	0.2	27	1	26.25	0.39	102	4.2	18.3	0.5	133.8	4.5	172	1.5	302	4
182	4.1	74	1	97.03	19.33	0.6	0.2	27	1	26.27	0.3	102	4	18.3	0.8	136.1	2.9	173.1	2.8	306	3
184.3	3.8	74	1	97.2	4.37	0.6	0	27	1	26.34	0.34	102	4	18.5	1.2	136.7	2.2	179.3	2.8	321	6
215.5	3.7	74	3	97.94	3.69	0.6	0.2	27.3	0.5	26.43	0.36	103	2	18.5	0.2	139.5	1.8	182.7	2.5	323	4
218.9	2.5	74.1	3.1	98	1	0.6	0.5	28	1	26.43	0.39	103	3	18.6	0.6	141.5	1.6	185	3	329	31
220	2.6	75	1.1	98.28	4.13	0.7	0.2	28.8	1.8	26.5	0.3	104	8	18.6	0.4	148	1.9	187	3	343	4
226	3.1	75	2	99	1	0.7	0.1	30	2	26.62	0.45	104.3	3.7	18.8	1	149	2.6	201.1	4.1	345	9
227.9	2.6	75	1	99	2	0.7	0.3	33	2	30.32	0.51	104.73	2.55	18.9	0.3	152.1	1.5	201.3	3	350	21
234	4	75	1	99	2	0.7	0.2	35	1	31.12	0.38	104.8	2.6	19	0.3	157.3	4	202.5	3	352	18
239.7	3.7	75	1	99.03	3.89	0.7	0.2	35.4	1	31.4	0.6	106.27	3.12	19.1	0.3	158.5	2.7	208.5	7.2	357	18
240.4	3	75	2	99.2	3.56	0.8	0.3	37	6.6	31.7	0.5	106.3	2.4	19.3	0.5	163	2.8	223.1	2.5	357	31
240.8	4	75.2	2.4	99.92	3.4	0.9	0.3	39.7	0.3	31.74	0.31	107.2	4.3	19.3	0.3	246.5	4.7	226.1	4.8	357	15
241.7	3.8	75.2	2.8	99.95	11.32	1	0.2	39.9	1.9	31.9	0.42	107.6	3	19.5	0.9	300.7	3.4	226.9	3.7	364	36
241.8	2.8	75.9	1.5	99.98	3.72	1	0	40	1	32.3	0.6	107.8	3.9	19.5	0.5	307.8	1.5	232.1	4.4	367	37
242.2	7.9	76	1	100	2	1	1	40	0.5	33.47	0.31	108	3	19.6	0.8	310.3	2.35	234.5	4	375	23
242.9	4.2	76	1	100	2	1.1	0.3	40.4	4.4	33.9	0.6	108.4	3.7	19.6	0.2	310.3	2.35	236.5	3.5	375	22
244.4	3	76	2	100.33	2.16	1.1	0.2	41.7	0.4	38.1	5.4	109	4	19.7	0.1	310.9	1.85	236.5	6.3	383	36
244.6	3.8	76.4	1.8	100.35	2.77	1.1	0.3	42	1	40.2	2.7	109	44	19.8	0.4	311.1	2.85	239.1	4.4	384	31
245	3.5	76.7	1.5	100.58	4.1	1.1	0.3	42.9	1.2	41.7	2.2	109.3	2.8	19.8	0.4	322	1.25	239.4	4.2	387	29
245.7	3.8	77	2	100.63	6.63	1.2	0.1	43	1	42.4	0.6	109.4	3.4	19.9	0.5	333.2	4.35	239.6	4	389	21
247	4	77	2	101.1	54.8	1.3	0.5	43.6	0.3	43	1.7	109.62	2.84	20.2	0.5	358	45	240.1	3.1	389	5
249.5	3.4	77	1	101.12	4.55	1.3	2.9	44.8	0.9	44.6	6	109.7	4.7	20.3	0.5	364	11	241.3	4.6	390	19
252.5	3.3	77	1	102	2	1.3	0.2	45.7	1.9	46.3	0.9	109.9	3.2	20.3	0.6	405.4	3.5	241.9	6.1	395	9
254.2	4.4	77	1	103.4	0.9	1.4	0.2	46	1	47.5	2.8	110.8	6.1	20.4	0.5	419.3	4.1	243	3	396	16
254.8	3.8	77	1	103.5	2.77	1.4	0.9	46.1	1.8	48.26	1.02	110.9	5.3	20.7	0.3	456	17	243.8	3.9	396	9
255.5	3.5	77.1	0.8	104	1	1.5	0.3	46.6	0.9	53.5	0.9	111	5	20.8	0.5	470.4	3.8	244.2	3.9	397	29
256.9	4.5	77.7	1.9	104.31	4.47	1.5	1.3	46.7	5.1	73	1	112	2	21	0.2	472.2	3.8	244.6	2.8	397	13
257.5	2.6	78	1	105	4	1.6	0.7	47	2	94	2	112.2	0	21.1	0.9	472.4	3.4	245	4.6	401	9
259.8	4.1	78	2	106	2	1.7	0.2	47.1	0.3	127	161	112.4	4.5	21.2	0.4	473.8	5.8	245.1	3.7	402	3
260.3	3.3	78	2	106.57	34.67	1.7	0.2	47.4	0.4	152.3	1.7	112.7	6.7	21.2	0.3	474.8	4.3	245.4	4.6	402	2
262.7	3.1	78	1	107	2	1.7	0.2	47.6	2.8	153	6	114	3	21.3	0.2	476.1	7.1	245.8	4.3	402	15
264.9	2.5	78	3	107	2	1.7	0.2	48	4.1	153.5	1	114.43	3.58	21.3	0.6	479.3	2.5	246.9	4.8	403	10
268.3	3.2	78	1	108	3	1.7	1.2	48.9	0.7	153.8	2	115	4	21.3	0.6	479.5	2.05	247.2	2.9	404	33
268.5	4.4	78	1	108	1	1.7	0.2	49.7	0.8	154	4	115	12	21.6	0.4	481.9	3.2	247.5	4.4	404	18
269.9	3.7	78	1	108	2	1.9	0.1	49.8	1.6	155.1	1	115	4	21.7	0.6	482.7	3.2	247.7	3.5	404	5
270.4	2.9	78.1	1.2	108	2	1.9	0.3	49.9	0.3	155.9	1.2	115.3	3.7	22	0.8	503	10	247.9	3.8	405	5
271.2	9	78.2	1.2	109	1	1.9	0.4	50	1	156	16	115.7	3.8	22.3	0.6	511	10	247.9	3.2	405	11
271.6	2.9	78.3	2.8	109	1	1.9	0.1	50.5	0.8	157.1	1.7	116.7	3.6	22.7	0.6	515	6	249	3.8	405	5
272	3.2	78.3	2.1	109	2	1.9	0.1	50.9	2.4	157.6	1.6	118	4	23.2	0.8	515.5	5.5	250.6	6.9	406	15
272.2	3.1	79	2	109.69	4.28	2	0	51	1	157.7	1.8	119	14	23.4	0.4	518.9	1.7	250.7	4.4	406	6
272.9	3.3	79	1	110	2	2	0.1	51.2	3.6	158.4	1.8	119.7	2.8	23.5	0.8	522	14	250.7	3.3	407	15
274.3	4.1	79	1	110	1	2	0.1	51.2	0.7	159.3	1.1	119.9	4.1	23.7	0.4	526	2.5	250.9	3.2	407	30
276.5	4.8	79	3	110	2	2.1	0.9	52	1	159.4	1	120.4	2.3	23.9	1.5	526	13.5	251.2	4.3	408	20
277	3.3	79	1	111	2	2.1	0.1	52.4	3.5	159.7	1.8	122.29	6.26	24	1.6	526	3.5	251.4	3.7	408	12
277.3	3	79	1	111.3	1.4	2.2	0	52.4	0.8	159.8	1	122.85	4.38	24.8	0.1	532	13.5	251.7	3.8	408	16
277.3	4.2	80	1	111.8	1.4	2.2	0.3	53	1	161	4	124	6	24.8	0.5	534	10	251.8	4.1	409	41
277.6	3.2	80	1	111.8	1.9	2.3	0.4	53	2	162	5	125.6	3.9	26.4	1.7	535	10	252.2	5.6	409	22
277.7	10	80	1	112	2	2.4	0.2	53.1	1.1	162	1.1	125.8	5.2	27.1	0.7	535	10	252.4	3.3	410	21
278.6	3.8	81	2	112	2	2.4	0.3	53.6	1.8	162.5	1	126.6	2.9	28.5	1.4	535	10	253.2	2.9	410	7
279.2	2.9	81	1	112.5	0.8	2.5	1.3	53.8	3.9	164.7	2.3	127.9	2.9	29	0.4	536	7	253.6	3.3	410	19
279.2	3.6	81.9	3.5	112.6	2.85	2.7	0.3	54.3	1.6	165	5	127.97	4.15	30.9	0.5	537	7.5	253.8	3.6	411	14
280.9	4.4	82	1	113	2	2.8	0.6	55	3.5	166	18	130	4	32.1	1.7	538	4.5	253.8	4.4	411	19
282	3.3	82	1	113	2	2.9	2.3	55.1	1.6	166.6	1	131	5.7	32.9	1	539	4	254.4	3.8	412	5
284.3	3.3	82	1	113	2	3	2.7	56	1	166.8	0.9	131	5	32.9	1	540	7	254.5	4.8	412	14
284.8	6.3	82.1	1.9	113	1.2	3	0	57.2	2.1	167.3	1.2	131.91	3.96	33.25	7.05	540	14	254.5	4.1	412	8
285.2	3.6	82.8	1.2	114	1	3.07	0.16	57.4	2.1	168	5	133	6	33.3	1.5	540.9	2.3	254.8	2.7	413	12
286.7	3.6	83	1	114	3	3.1	0.2	57.4	0.9	168.8	1.1	133	4	33.7	0.3	541	7.5	254.9	3.6	413	7
286.9	2.8	83.4	1.7	114	2	3.1	1.7	58	2	169.9	1.7	134.2	14.1	34.1	1	541	10	255.1	3.6	414	16
287.4	3.6	84.1	4.7	114	2	3.4	1.6	58.1	0.4	170	13	136.6	0	34.6	1	541.4	1.7	255.3	3.2	415	30
287.5	3.8	85	2	114.9	4.6	3.4	0.4	59	1	170.2	0.9	138.16	4.48	34.6	1.1	542	3.5	255.5	3.5	415	19
288.6	3.3	85.9	0.9	115	2	3.5	1.1	61	1	171	4	139	10	35.2	1.2	543	8	255.7	3	415	6
291	5.3	86	4	115	3	3.5	0.8	62	1	171.2	0.9	140.4	4.1	35.2	1	543	8	256.5	4	415.6	6.2
291.2	3.1	86.6	1.7	115	2	3.51	0.26	62	1	173	5	144.4	5.1	35.4	0.8	543	11	256.6	4.4	416	14
291.5	3.8	87	1	115.1	0.95	3.53	0.25	62.5	1.2	173	3	147.4	6.6	35.5	0.8	544	8.5	256.9	3.5	416	17
293.4	3.7	87	2	115.1	0.85	3.7	0.2	62.8	0.4	173	2	148	19	36	0.8	544	8.5	258.1	4.6	417	18
295.3	4.6	87.6	2.7	115.2	1.9	3.7	0.4	63	1	173.1	1.1	151	5	36	2.6	544	17	258.3	4.8	418	6
296.3	3.2	88.3	2.1	115.6	1.55	3.8	0.6	63	0.3	174	2	153	2	36.2	0.8	544	17	258.5	3	418	19
297	4.4	89.4	2.3	116	2	3.9	0.9	64	1	174.4	1.8	153	5	36.8	0.9	545	10.5	259	3.8	418	36
299.5	3.3	89.8	3.2	116	3	3.9	0.6	64.9	1	180.4	1.8	154.3	5.1	39.1	0.4	546	3.5	259.1	3.2	418	19
299.6	4	90	2	116.8	0.75	4	0.2	65	0.9	181	3	154.4	4.5	40.1	3.8	546	7	259.2	3.4	420	4
300	16	90.2	0.9	116.8	5.1	4	3.5	65.2	4.9	182	2	155.9	3.6	40.1	1.2	546	11	259.3	4.5	420	14
300.3	4.3	90.9	1.9	117	1	4.1	0.7	65.7	0.9	182.8	1.7	156.5	3.5	40.2	1.1	548	6.5	259.7	3.2	420	55
300.4	5.4	91	5	117	2	4.2	3.8	66	1	186	2	159	3	40.9	1.3	548	14	260	4.7	420	2
302	10.3	91.6	3	117	2	4.2	0.2	66	1	194	5	159	4	42.3	1.5	551	12	260.1	4.8	421	14
304	3.5	91.8	1.6	117	3	4.2	6.5	66	1	195	5	161.3	6.1	42.8	0.5	553	11	260.2	5.9	422	59
304.2	3.6	92.2	1.5	117	2	4.2	0.5	66	2	196	4	161.4	3.2	43	1.8	554	11.5	260.3	3.8	422	11
304.3	3.3	92.46	11.72	117	2	4.2	0.8	67	2	199	2	164	12	43.3	0.85	554.6	2.05	260.4	3.1	422	2
306.6	3.6	93.1	1.6	117.8	1.49	4.22	3.79	67	1	200	5	164.5	4.3	43.6	25.4	555	8.5	260.4	3.8	422	6
306.6	4.3	93.3	1.4	118	1.1	4.22	0.22	67	1	204	59	166	5	43.6	1.3	556	2	260.6	5.8	422	8
307.1	4.4	93.3	1.4	118	1	4.3	0.38	67	0.3	208	3	166.9	7.2	44.5	3.5	557	11	262	3	422	23
307.5	4.9	94	1.6	118	5	4.4	0.3	67.1	1.4	216	41	168.4	3	44.6	1.3	557	5.5	262	3.2	423	14
307.8	4.1	94.9	1.9	118.1	1.9	4.6	3.3	67.8	1.7	216.8	9.25	168.7	8.3	45.1	1.8	558	4.5	262	4.4	424	12
309.8	4.4	95.3	1.3	118.4	1.25	4.7	1.9	68	2	221	3	169.2	7.7	45.2	1.3	561	28	262.3	5.1	424	8
309.8	8.7	95.3	1.2	118.9	1.6	4.71	0.17	68	1	223	7	170.4	7.9	45.3	1.4	564	22	262.8	3.7	424	8
309.9	12.5	95.4	1.3	119	1	4.74	0.22	69	1	224	3	170.8	4	45.5	0.5	564	11.5	263.2	3.3	424	14
310.7	4.8	95.6	1.2	119	2	5	4	69	2	227	3	173	5	45.7	2.7	564	23	263.5	3.4	424	21
311.6	4.4	95.6	1.5	119.6	0.65	5.1	2	69	2	228	2	178	6	46.4	1.2	564	23	263.5	4.5	424	36
313.1	4.6	95.7	1.8	119.7	6.6	5.2	1.5	69.5	1	234	3	179.6	0	46.5	2.6	564	12	263.7	3.9	424	18
313.6	4.7	96.1	1.8	119.9	0.85	5.3	0.5	69.8	0.9	236.3	3.4	180.7	8	46.5	1.2	564	14.5	264.3	4.4	425	27
313.6	4.3	96.4	1.7	120	2	5.5	0.1	70	2	237	11	182.1	6.2	46.7	1.3	564	8.5	264.4	3	425	17
317.3	4.3	96.5	1.9	120	2	5.5	0.4	70	2	237	3	185.2	5.2	46.89	6.37	565	9	264.4	3.7	425	24
318.3	4.6	96.6	1.9	120	3	5.7	0.4	70	1	239	59	189	169	47	4.7	565	9	264.5	3.1	425	37
320.2	5	96.8	1	120.1	0.9	5.7	2.8	71	2	240	2	190	9	47.08	4.55	565	18	264.7	4.9	425	23
320.7	5.3	96.9	1	120.2	1.15	5.8	2.5	71	2	240	3	191	2	47.1	1.5	565	18	265	7.5	425	13
322.5	4.4	97	1	121	5	5.9	2.1	71	2	243	3	192	7	47.1	4.08	567	5.5	265.6	4.1	426	27
324.1	7	97.1	1	121.1	4.9	5.9	1.2	71	1	245	7.5	194	2	47.2	3.9	567	11	266.2	3.4	427	32
325.4	5.4	97.3	1.5	121.4	3	5.9	1.2	71	1	246	4	196	3	47.3	2.8	569	4	266.5	4	428	5
326	5.2	97.3	2	121.6	5	5.9	0.5	72.3	0.9	246	52	196.8	9.3	47.3	4.7	569	24	266.6	4.5	428	27
326	11	97.3	1.1	122	2	5.9	0.8	72.6	0.9	247	8	199	3.8	47.3	1.7	572	7	267.4	3.7	428	27
328.2	5.7	97.4	1.5	122	1	5.9	0.4	73	1	250	77	199.3	5.5	47.4	1.8	572	14	267.5	3.4	429	19
328.5	4.8	97.7	2.6	122.7	2.1	5.9	2.13	73	1	251	6	203.4	0	47.5	2	573	9	267.7	4.4	429	20
328.6	5.3	97.8	1.8	122.7	1.6	6	1	73.5	1	253	3	203.81	5.35	47.6	3.3	573	9	267.9	10.1	429	19
329.7	5.4	98	1.7	123	2	6.1	0.6	74	1	254	4	204.3	6.8	47.9	2.1	573	18	268.1	4.3	429	20
336.6	7.2	98	1.3	123	1	6.2	2.5	75	1	254	5	207.77	9.02	48.1	0.9	573	5.5	268.6	8	429	16
336.7	5.8	98	2.6	123.9	1.2	6.3	0.2	75	2	254	9	209	9	48.1	0.6	575	9	268.8	3.9	430	11
337	4.8	98	2	124	4	6.3	0.5	75	1	255	3	212	3	48.17	3.97	575	9	268.9	3.5	430	16
341.4	4.7	98.1	2.8	124	1	6.3	0.4	75	2	256	7	213.4	8.6	48.2	0.8	575	18	268.9	5.9	430	4
342.3	4.4	98.2	1.4	124.8	3.2	6.4	1	75	2	257	3	213.5	13.8	48.4	0.5	575	18	269.1	5.2	430	51
342.5	7.3	98.2	1.2	124.9	8.1	6.4	0.6	75	5	258	3	216	5.9	48.4	2.6	575	18	269.5	3.5	430	56
343.9	4	98.5	3.9	125	2	6.4	4.3	75.8	1.2	258	4	217.5	10.4	48.6	3.8	577	9	269.8	5.8	430	7
344.9	3.9	98.6	1.4	125	3	6.5	6.7	76	1	258.8	14.55	218.4	5.9	48.6	1.7	577	9	270.2	3.4	430	6
345	5.8	98.7	1.3	125	1	6.5	0.4	77	2	259	4	219	9.3	48.7	1.1	577	18	270.8	4.3	431	10
345.4	5.8	98.9	1.6	125.5	5	6.5	1.9	77	2	259	3	222	11	48.7	3.3	577	18	270.8	3.8	431	15
351	4.3	99.7	2.1	126	2	6.6	0.9	77	2	259	3	223	2	48.9	2.7	577	8	271	3.4	431	30
354.2	6.2	100.1	2.2	126	2	6.6	1.4	77	1	259	3	223.1	10.9	49	0.9	577	1.2	271.1	3	431	30
354.2	5.8	100.2	3.4	126.2	2.2	6.7	0.6	78.8	0.7	261	2	223.5	9.1	49.1	3.1	577	10	271.5	3.7	432	36
356.3	4.6	100.4	3.9	126.8	1.25	6.7	0.8	79	2	263	3	225.1	7.7	49.2	4.8	578	8.5	272	2.9	432	6
356.6	5.8	100.7	1.9	127	2	6.8	1.6	79	1	265	3	226	11	49.3	4	578	8.5	272.5	3.5	432	26
360.5	6	101	1	127	1	6.9	1.2	79.1	4.7	265	8	226	11	49.4	1.5	578	15	272.9	3.5	432	39
361.1	5.9	101.2	1.4	127	2	6.9	0.5	79.5	1.1	265	3	226	14	49.41	4.73	580	8	273.1	5.2	432	3
363.9	4.2	101.3	1.2	127.4	1	6.9	4.4	80	1	266	6	226.6	11.4	49.51	4.22	580	15	273.4	3.9	432	16
367.3	5	101.4	1.5	127.9	1.6	7	2.3	80	1	267	3	226.8	8.2	49.55	2.44	580	16	273.6	4.6	432	7
372.1	6	101.5	2.4	128	1	7	0.5	81	2	268	63	227.4	5	49.6	2.1	581	10	273.8	5.4	432	8
373.9	5	101.6	1.4	128	2	7.08	0.12	81.5	1.4	269	7	228	8.4	49.7	2.7	582	11	275.3	4	432	9
374.2	5.2	101.7	2.6	128.3	4.7	7.1	3.8	82	2	269	6	228.1	5.2	49.7	2.8	582	8.5	276.1	3.8	433	22
376.3	4.5	101.8	1.5	129	2	7.1	1.1	82.5	0.6	269	3	228.3	9	49.7	4	582	11	276.2	3.6	433	15
377.7	4.9	101.9	2	129.7	3.4	7.1	0.3	83	6	270	3	228.7	57.3	49.8	2.4	582	17	276.4	6.2	433	15
378.1	5.4	102	2.1	130.3	2.3	7.1	2.9	83.3	0.9	270	3	230.8	8.1	49.9	2.5	582	17	276.8	3.3	433	28
387.2	5	102.2	1.1	130.3	1.7	7.13	3.77	84	1	270	8	231.1	5.4	50	2.6	582	13	277	3.2	433	15
394.4	4.6	102.3	1.5	132	1	7.15	1.9	84	1	270	5	231.5	11.3	50	4	582	2.5	279.1	3.5	433	24
394.8	5.3	102.4	2.1	132.2	1.5	7.19	0.19	87	2	271	9	231.6	4.9	50	3.3	583	9.5	279.8	7.1	433	29
397.8	4.1	102.6	1.4	133	1	7.2	0.3	87	2	271	6	233	6	50.1	2.3	583	19	279.9	5.7	433	5
400.2	10.1	102.7	1.7	133	3	7.2	1.9	87.3	8.1	272	3	233.2	0	50.1	2.1	583	19	280.2	2.9	433	18
402	12	102.7	1.3	133.8	1.4	7.2	1.4	87.7	3.6	274	3	233.4	5.1	50.2	0.6	584	9	280.2	3.2	434	24
404	8	102.8	2.6	135	1	7.2	0.5	87.8	0	274	3	233.8	7.8	50.2	2.1	584	18	282	3.9	434	2
407.9	5.7	102.9	1.3	135	1	7.2	8	88.1	11.1	275	5	233.8	10	50.3	0.38	585	8	282.3	3.3	434	15
409.4	4.5	103.1	1.6	135	1	7.21	0.65	88.6	0	275	8	233.95	7.59	50.3	3.1	585	15	283.8	4.5	434	21
411.4	6.5	103.3	2.4	135	1	7.24	0.44	88.6	0	276	213	234.1	0	50.4	4.8	586	8	284.5	3.2	435	13
415	4.5	103.3	1.4	135.3	4	7.3	2.2	89	0	276	9	234.9	10.9	50.5	1.2	586	8	285.3	8.9	435	20
415.5	7.6	103.3	1.6	135.8	8.5	7.3	1.2	89	1	276	3	235	8.8	50.6	4.3	586	16	286.6	3.7	435	26
419	5.5	103.4	1	136	2	7.34	1.24	89.1	0	277	4	236	4	50.6	1.12	586	16	286.8	5.7	435	12
420.4	6.9	104.1	1.3	136	1	7.4	0.3	90	2	278	3	236.4	0	50.6	3.5	587	4.5	287.9	5.7	435	8
424.5	6.4	104.4	2.9	136	2	7.5	1	91.9	0.9	278	3	236.5	0	50.7	0.9	587	9.5	288.5	3.1	436	28
424.8	5.3	104.4	2.1	137	1	7.6	0.2	92	2	278	3	237.5	5.4	50.8	2.6	587	16	290.9	4.4	436	11
428.5	6.1	104.9	1.4	137	1	7.6	1.7	92	1	279	3	237.7	12.1	50.8	3	587	9	292.1	5.9	436	40
434.6	5.3	105.1	3.6	137.4	1.75	7.6	0.2	92	2	279	6	238.7	13	50.9	1.5	588	6	292.3	3.8	436	21
435	4	105.4	1	138	2	7.6	0.6	94	2	279	4	238.8	11.7	51	1.2	588	12	293.1	3.5	436	15
436.8	4.9	105.4	1.7	138.1	1.85	7.6	1.4	94	2	280	5	239.1	8.8	51.4	1.6	588	11	293.3	3.4	436	23
441.6	5	105.4	0.7	140	3	7.6	1.9	94	1	281	6	240.6	7.1	51.4	2.9	588	11	293.5	4.4	436	6
441.7	7.2	105.4	1.4	141	2	7.65	1.7	95	2	281	2	241.3	4.7	51.56	5.43	591	21	293.8	5.2	437	35
444	8	105.6	1.4	141	1	7.7	0.5	95	2	281	5	241.5	5.8	51.6	1.5	591	42	295.5	4.8	437	21
445.6	5.6	105.8	2	141.4	1.25	7.7	0.7	96	3	281	4	241.9	5.2	51.7	1.8	592	8	297	4.1	438	14
445.8	3.2	106	1.3	142	2	7.7	1.2	96	2	281	10	242	2	51.7	3.6	592	16	299.5	5.4	438	14
446	8	106.1	1.6	142	2	7.72	0.94	97	2	282	3	244.2	7.6	51.9	1	593	4	302	5.2	438	25
446	3.5	106.4	2.1	142	1	7.8	2.1	100	2	282	14	244.2	6.9	52.2	4.2	593	7.5	315.1	4.7	438	3
449.2	6.4	106.6	1.1	143	1	7.9	11.9	100	2	282.5	13	244.2	5.6	52.3	7.1	593	6	329.1	3.6	438	34
451.2	6.9	106.8	2.3	143.7	1.45	7.9	1.2	100.2	3.8	283	6	244.4	11.5	52.5	1.7	593	12	330.1	5.3	438	10
451.6	6.8	107.1	3.3	144	3	7.9	0.5	101.2	5.8	283	6	244.4	4.9	52.7	5.4	593	9	332.6	4.6	439	16
451.6	5.2	107.2	1.6	144	2	7.94	0.73	102	2	283	6	245	7	52.7	1.6	593	15	333.9	14.1	439	24
454.2	7.5	107.5	1.2	145	1	8	1	102	2	283	3	245.1	5.2	52.7	3.2	593	8	337	4	440	43
457	9	107.6	2.2	146.4	1.9	8	0.2	102	1	283	4	245.6	5.7	53	1	593	18	338.9	3.6	440	20
457.7	5.5	108.2	1.3	147	1	8	1.2	102.8	1.3	284	21	245.97	7.83	53	3.9	593	18	342.4	6.1	441	25
458	9	108.4	1.2	147	2	8.1	2	103	2	284	9	246.3	5.8	53.1	1.3	593	12	347.6	3.9	441	54
459.3	4.7	108.6	2.4	147	1	8.1	0.6	103.3	7.6	285	3	246.4	5.8	53.2	3.2	594	8	351.6	5	441.4	6.4
462.5	4	109.2	1.8	147	2	8.12	2.02	104	2	285	6	246.7	7.2	53.3	2.7	595	7.5	352.1	4.2	442	27
463.3	6	109.4	1.6	147	2	8.19	1.12	104	3	285	6	247	5.7	53.5	4.6	595	15	360.2	4.1	442	13
465	9	109.4	1.6	147	1	8.2	4	104	2	285	0	247	7	53.5	1.3	595	8	364.2	5.4	442	21
466	10	109.5	1.1	147	2	8.2	1.1	105	2	285	9	247.6	11.4	53.9	4.8	595	17	364.7	7.3	442	21
471.3	5.1	110	1.4	147	1	8.2	5	105	3	285	3	248	8.8	54	0.83	596	12.5	370.9	4.3	442	35
471.5	4.6	110.3	1.7	148	1	8.3	0.6	105.7	5.1	285	6	248.1	5.5	54	1.8	596	5.5	372.4	4.2	443	69
471.8	5.5	110.4	1.3	148	2	8.3	2.2	108	2	286	9	249.2	8.2	54.1	2.9	596	8.5	376	10.5	443	24
473.7	4.6	110.7	1.4	148	2	8.4	1.4	109	3	288	6	249.3	7.3	54.2	4	596	12.5	377.5	5.3	443	29
474.2	5.2	110.9	2.5	148	2	8.4	0.8	110	3	288	6	249.4	7.4	54.2	3.7	596	8	378.8	6.1	443	7
474.6	9.1	111.3	1.7	149	2	8.4	0.5	110	2	288	3	249.4	8	54.4	0.5	596	19	379	7	443	8
475	9	111.4	1.5	149	2	8.4	0.3	110	2	288	4	249.6	7.4	54.47	7.43	596	11	380.2	16.1	443	3
475	4	111.8	1.4	149	1	8.4	0.59	112	2	290	6	249.8	7.9	54.6	2.3	597	10	381	7	443	20
475	6.3	111.9	1.9	149	2	8.5	1.1	112	6.7	290	9	250	3	55	1	598	3.5	382.4	4.7	443	23
475	11	112.1	2.6	149	2	8.5	0.4	114.5	1.1	290	9	250.1	13.7	55	1	599	16	383	5.9	443	58
479.4	5.9	112.1	1.5	149	2	8.56	0.9	115	2	290	5	250.2	8.5	55	2.9	599	16	395	5	443	41
479.7	4.6	112.1	1.5	149	2	8.6	0.5	116	2	290	19	251	3	55.2	3.3	599	16	397.2	4.4	443	29
480	9	112.2	1.9	150	2	8.6	0.7	117.2	0.7	290.69	4.92	251	3	55.7	1	600	10	398	7	443	8
480.3	5.3	112.6	1.2	150	3	8.6	1.5	118	2	291	8	251	7.6	55.7	2.5	600	16	400	5	443	23
480.4	6.7	112.6	2.3	150	2	8.68	1.35	118	2	291	3	251.6	8.3	55.8	2.5	600	6	403.5	4.6	445	17
481	10	112.9	1.3	150	1	8.7	1.4	120	3	291	7	252	3	55.9	5.4	600	12	404.2	4.6	445	14
481.3	6.7	113	1.1	150	2	8.7	2.7	120	3	292	5	252.2	5.1	56	1	601	18	405.9	5.2	445	18
483	9	113.1	1.3	151	2	8.71	1.6	121	1.6	292	9	252.4	7.4	56.2	2.2	601	10	411	6	445	7
485	4	113.6	1.4	151	3	8.8	0.6	122	2	293	5	253	3	56.5	2.6	601	0.7	413	2.5	445	13
486	6	113.9	1.1	151	2	8.8	0.9	123	3	294	4	253	1.5	56.7	5.4	602	6.5	414.2	4.5	445	5
488	6	113.9	1.2	151	2	8.8	1.4	125	3	295	6	253	3	56.7	2.4	602	15	417.9	5.5	446	22
488	4	113.9	1.1	151	2	8.86	2.05	125	3	295	5	253	3	56.8	0.63	603	9	421.3	16.6	446	6
488.4	5.2	114	1.3	151.4	2.3	8.9	0.8	126	2	295	9	253	3	56.8	2.5	603	9	422	11.1	447	13
489	5.4	114	1.7	152	2	8.9	2	129	2	295	6	253.1	13	57.1	1.2	603	3.5	423	5	447	38
490	5	114	6	152	2	8.9	0.7	130	2	296	3	254	1.5	57.3	4	603	9	427	16.2	447	11
490	5	114.4	1.5	152	2	8.9	1	133	3	296.6	2.05	254.5	7.9	57.8	1.4	603	9	427	5	447	50
490	7	114.5	3.3	152	1	8.9	0.6	133	3	296.7	1.85	254.6	6.1	57.9	2.2	603	1.2	431	6	447	32
490	7	114.8	2.1	152	1	8.9	0.9	134	4	297	5	254.9	7.1	58.1	0.7	603	18	432	4.9	448	34
491.7	4.9	115.3	2	152.1	1.35	9	2	134	3	297	0.25	254.9	11.2	58.1	4.8	603	18	434	5	449	15
493	7	115.6	1.8	153	2	9	0.5	134.2	2.5	298	6	255	8.9	58.1	2.8	603	0.7	436	5	449	23
493	9	115.7	1.4	153	2	9	1	141.6	1.8	298	164	255.4	8	58.5	2.9	603	11	437	5.9	449	25
494	5	117.3	1.3	153	1	9.03	0.53	143.2	2.8	298	84	255.9	14.9	58.6	5.1	604	11.5	440.93	21.51	449	23
494	5	117.9	1.2	153	2	9.1	10.1	158.5	2.1	298.1	1.25	256	3	58.8	3	604	11.5	444.93	8.97	449	7
495	7	119	1.5	153	2	9.1	1.1	164.5	7.7	298.2	2.9	256	3	58.9	0.3	604	23	446.9	4.8	449	29
495	5	119	2	153	2	9.1	0.8	197.9	2.7	299	3.1	256	6	59	2.9	604	23	448	5	450	14
496	6	120.1	1.8	153	2	9.1	1.4	199	3	299.1	2.5	256.89	9.87	59.1	1.9	605	8	451.8	5.8	450	42
496	6	122	5.2	154	2	9.1	0.7	199.8	1	300	40	257	3	59.3	2.8	605	9	452.1	5	450	16
496.1	4.9	122.4	1.7	154	2	9.16	0.55	201.9	4.5	301	9	258	0	60	2	606	9	454	5	451	43
497	7	122.4	1.8	155	2	9.2	2.1	207.5	1.4	301	7	258.1	7.3	60.1	1.6	606	13	454.1	6.2	452	19
497	7	123	4	155	2	9.2	0.5	217	3	301	4	259	3	60.3	1.7	607	8	457.9	6.6	452	20
497	22	123.3	2.3	155	1	9.2	0.7	221.5	2.8	301	4	259	3	60.6	1.8	608	6.5	458.4	5.5	453	3
498	6	124.1	1.8	155	2	9.2	2.5	225.5	2.9	302	9	259	3	61.1	2.6	608	8	459.23	14.31	454	8
498	5	124.8	1.8	155	2	9.2	2.09	248	4	302	26	260	3	61.3	0.79	608	9.5	462.5	5.8	454	35
499	9	125.1	2.2	155	3	9.25	0.3	249.7	7.5	302.8	4.3	260	1.5	61.5	2.1	608	13	464.05	9.56	455	33
499	10	125.3	1.8	155	2	9.29	1.22	261.5	8.4	302.97	4.72	260	7	61.9	0.5	609	8.5	465	5	456	26
500	10	125.4	0.6	155	2	9.3	1	261.6	0	303	4	260	8	62.6	0.7	609	16	466	8	456	37
500	28	125.9	1.6	155	2	9.3	0.9	264.6	7.9	303	5	260.38	16.83	63	1	609	11	467	15	456	25
501	7	126	1.9	155	2	9.3	1.4	269.6	6.7	303.5	3.7	260.6	12.3	63.3	2.7	609	8	467.65	10.17	456	6
501	10	126.2	2.7	155	2	9.3	0.5	269.9	8.9	304	4	260.7	12.4	63.5	1.5	609	0.9	468.6	7.5	457	29
501	7	127.3	1.4	156	2	9.31	0.98	273.3	3.7	304	4	261.8	11.5	63.67	8.02	609	17	470	8.6	457	23
501	4	127.7	1.7	156	2	9.37	2.28	283.2	6.6	304	9	262.1	10.5	63.7	16.6	610	21	470	5	458	17
502	10	128.2	2.1	156	2	9.4	2.3	292.8	5.2	304	4	262.2	16	63.8	1.1	611	19	470.3	4.1	458	50
502	10	128.7	2	156	2	9.4	0.4	298.5	5.4	304	24	262.3	9.6	64	1.7	611	38	471	5	458	26
502	19	129.1	3	156	2	9.4	1.14	298.6	4.8	305	5	262.8	10.3	64	2	612	7.5	471	95	458	32
503	6	129.4	1.7	156	2	9.5	1.5	301	13.6	305	0	263.9	0	64.2	2.5	612	9	472.8	8.4	458	53
503	7	130	2.8	156	2	9.5	0.4	305.2	7.8	305	3	264	3	64.5	2.5	612	15	473.1	4	458	8
504	10	130.5	1.7	156	2	9.5	2.8	305.8	5.3	305	9	264	5.9	64.8	1.25	613	9.5	473.13	13.87	459	47
504	9	130.8	2	156	1	9.55	0.85	309	6.9	305	9	264.5	5.8	65	1	613	8	473.9	13.3	459	33
506	5	132.5	2.3	156	2	9.57	2.98	309.8	10.4	305	9	265	3	65.1	0.9	613	19	474.33	8.01	459	42
508	7	132.5	0.75	157	2	9.6	0.8	312.3	11	305	8	265	3	65.3	1.95	613	16	474.4	8.7	460	40
508	7	132.9	0.5	157	2	9.6	0.9	324	4	305	5	266	6.4	65.3	1.3	613	16	474.6	18.4	461	34
508.8	7.6	133.1	0.65	157	3	9.6	0.9	324	4	305	4	266	9.3	65.5	1.1	613	16	475.12	12.03	461	26
509.6	6.5	133.6	0.95	158	2	9.63	0.91	328.5	7.8	306	5	267	9.6	65.6	2.1	614	22	475.3	7.5	462	42
510	7	133.7	1.8	158	3	9.68	1.69	328.7	5.8	306	19	267.5	0	66.1	0.54	614	7	477.05	24.33	463	8
510	5	134	2.6	158	1	9.7	1.9	329.2	1.2	307	5	268	17.5	66.3	2.5	615	5	478	6	464	26
511	25	134.7	0.7	158	1	9.7	3.3	330.4	7.7	307	0	268.2	0	66.4	1.3	615	10	478	4	464	13
512	7	135.1	2.1	158	2	9.7	2.3	332.3	2.7	307	4	268.6	16.2	66.5	2.7	615	16	478	17.6	465	13
512	18	136.3	2.5	158	2	9.7	0.5	332.5	2.2	307.2	6.3	269	3	66.6	1.5	615	12	478.15	15.63	465	20
512	27	137.6	2.5	158	4	9.7	0.7	339.5	5	307.93	3.79	269	4	67.8	1.2	616	16	478.5	19.6	465	40
513	5	137.6	1.5	159	2	9.7	0.3	343.5	7.6	308	6	269	5	67.8	1.4	616	25	478.9	21.8	465.2	6.9
513	10	137.7	1.6	159	2	9.7	0.76	346.2	4.4	308	9	269.6	0	67.9	3.5	617	9.5	479.1	23.7	466	30
513	12	138	2	159	2	9.71	2.31	348.4	6.9	308	4	269.9	11.4	68.7	1	618	6	479.1	9.5	466	26
514	4	139.4	1.8	159	2	9.79	1.1	353.8	4.6	308.16	3.83	270.5	0	68.9	0	618	12	479.4	5	466	6
514	5	139.5	2.7	159	2	9.8	0.9	357.8	4.4	309	7	271	4	69.4	1.45	618	8	481.2	6.2	467	53
514	10	139.8	2.6	159	2	9.8	1.1	363.1	6.5	309.3	4.95	271	3	69.6	1.5	618	47	481.47	12.29	470	36
514	10	140	7	159	2	9.8	5.5	386.2	6.7	309.4	6	271	3	69.6	1.75	618	3	481.8	4.8	470	26
514	14	140.9	1.6	159	2	9.8	1.1	386.9	4.9	309.5	1.2	271	6.3	70	1	619	9	481.9	9.3	472	22
515	10	141	19.5	159	2	9.8	0.5	392	5	310	4.5	272	5	70.6	1.3	619	17	482.7	8.7	472	26
515	4	141.6	1.8	159	2	9.8	1.8	403.2	4.6	310	0.34	272	14	71.1	3	619	17	483.04	12.37	473	25
515	6	142.8	1.5	160	2	9.8	1.1	411.7	9.1	310	6	273	3	71.4	1.8	619	8	483.7	7.2	473	13
515	4	142.8	1.2	160	2	9.8	1.3	413.6	5	310	5	273	6	71.7	2.2	620	2	483.8	10.4	473	22
515.3	7.8	143.2	2.3	160	3	9.8	1.1	419	3	310	5	273.8	0	71.8	4.4	621	9.5	484	4	475	5
515.8	10.6	143.4	5.7	160	2	9.88	0.55	423.9	6.6	311.68	4.91	274	3	72	1.7	621	10	484	6	475	42
516	10	143.4	3.6	161	2	9.9	1.4	426.8	9.4	312	4	275	24	72	0	621	8.5	484.7	9.1	475	43
516	10	145.2	1.7	161	2	9.9	2.1	429.2	8.4	312	17	275	3	72.1	3.2	621.04	0	484.89	7.79	477	31
516.8	5.3	145.9	2	162	2	9.9	0.9	435.6	4.9	312	8	275	3	72.1	5.7	622	6.5	484.99	9.3	478	51
517	10	145.9	0.9	162	2	9.9	0.5	441	6	312	4	275	3	72.2	1.55	622	13	485	3	478	4
517	14	147	2	162	2	9.9	0.7	441.7	7.1	312	4	276	3	72.2	3.9	623	16	485	5	478	32
518	8	148	2	162.4	2.25	9.9	5	442.7	10.4	312.4	1.7	276	3	72.4	3.5	623	1.1	485.2	11.9	479	4
518	14	148.3	1.8	162.8	1.55	9.91	1.46	443.6	2.1	312.6	1.6	276	4	72.9	1.45	624	9	486.64	7.07	479	28
518	15	148.7	2.4	163	2	9.91	0.54	444.1	14.8	313	4	277	4	73	1.9	625	3.5	486.7	7	480	27
518	9	149.5	2.1	163	2	9.95	1.22	447.9	5.2	313	9	277	3	73	1.95	625	8	487	5	480	21
518.7	12.9	150	1	163	2	9.96	0.59	450.6	5	313.9	0	277	7	73.1	1.4	625	16	487.2	6.46	480	43
519	10	151.6	2.6	163	3	10	0.8	452.3	6.3	314	4	277	31	73.1	0.85	625	7	487.35	6.87	482	22
519	19	152	2	164	2	10	2.3	454.1	5.5	314	5	277	4	73.1	2.29	625	14	487.72	16.28	483	7
520	6	152.4	4.5	165	2	10	1.2	454.1	3.3	314.2	3.9	279	4	73.2	1.8	625.41	0	487.77	6.12	486	22
520	6	153	4.5	165	24	10	14.1	462	5	314.6	11.85	279	3	73.4	1.7	626	8	488	6	489	15
521	3	155.1	3.7	166	2	10	0.9	463.2	4.3	314.9	0	279	3	73.5	1.15	626	11	489	8	495	19
521	4	155.2	2.1	166	2	10	0.6	463.6	5.1	315	9	279	6	74.1	5.5	629	4	489.19	10.72	503.1	7
521	18	156.3	3.7	166	2	10	9	464.1	5.5	315	4	280	4	74.4	1.95	629	16	489.94	14.68	515	30
521	13.2	156.4	3.5	166	3	10	6	465.6	2.1	316	10	281.1	6.2	74.4	1.55	629	18	490	5	524	12
522	4	157.2	4.8	166	1	10	2	466.1	5.2	316	5	282	4	74.5	0.95	629	21	491	6	541	26
522	10	157.3	1.6	166.7	2.15	10.01	14.09	467.6	6.3	316	6	282.4	5.1	74.6	1.1	629	9	491	3	547	3
522	10	157.4	1.6	167	2	10.05	0.76	469.9	5.4	316	9	283.8	10.8	74.6	1.7	629	1.7	491	8.4	549	9
522	61	158	2	167	2	10.1	0.8	470.1	5.4	316.5	1.1	284	3	74.7	1.2	630	18	491.4	6.2	557	55
523	7	158.9	2.2	167	2	10.1	0.6	471.9	5.1	316.8	2.6	284	7	74.9	5.9	632	9	491.5	4.9	566	44
524	10	159	2	167	4	10.1	0.22	474.9	5.9	317	0	286	3	75.1	1.45	632	1.5	492	5	603	35
525	4.5	159	3	168	2	10.13	0.63	475	6.7	317	9	286.3	0	75.1	4.2	633	10.5	492	7	607	23
526	11	159.3	2.7	170	2	10.2	2.1	477.5	5.5	317	4	286.7	0	75.2	2.2	633	9	492	6	608	11
527	11	162.2	2.6	170	2	10.2	0.9	481	7	318	0.51	287	3	75.2	4.6	633	9	492	3	612.3	6.4
527	10	163.8	1.6	170	2	10.2	1.8	482.5	2.4	318.5	1.55	287.8	114.1	75.8	1.9	633	21	492	6	622.8	6.5
528	12	164.3	1.8	170	2	10.2	0.8	483.8	5.6	319	7	288	4	75.9	2.2	635	7	492.49	8.33	623	7
528	30	164.5	3.3	171	2	10.2	0.7	484	5.6	319	4	288.7	6.1	76	2.25	635	5	492.5	13.1	633	32
528.4	5.7	165.7	2.8	171	2	10.2	3.3	485.3	5.9	319	4	289	2	76.3	1.3	635	14	492.51	17.92	634	6
529	8	165.9	5.7	171	2	10.2	0.5	485.7	5.95	320	4	289	3	76.7	1.2	635	10	493	3	636.9	6.6
529	5.1	165.9	2.6	171	2	10.24	1.17	489	5	320	4	290	4	77.1	1.5	635	1	493.1	4.3	642	62
529.7	14.8	166.2	2.7	171	2	10.26	0.5	489.6	5.9	320.3	0	290	4	77.3	0.9	636	18	493.27	11.54	645	27
530	11	166.4	2	171	3	10.3	0.3	490.7	14.9	321	5	290	7	77.3	3.7	637	9	493.75	7.34	648	8
531	11	166.7	2	171	2	10.3	1.1	491.3	10.4	321.9	2.6	290	16	77.4	2	638	10	494.5	13.1	651	11
531.2	5.5	167	3	171	1	10.3	0.3	497.9	14.8	322	0.26	290.4	0	77.4	2.3	638	6.5	494.83	17.52	653.2	6.8
533	10	167.4	1.7	172	2	10.3	1.5	498.3	16.2	322	5	291	6	77.9	2.3	638	9	495	4	656	14
533	5	167.7	1.7	172	2	10.3	1.3	499	5.6	322	10	291	3	78.6	4.7	638	18	495	5	662.7	6.8
533	11	168	1.7	172	2	10.32	0.87	499	5	322	10	291	4	78.8	1.3	638	18	495	5	676	3
533	7	168.2	3.3	172	4	10.38	1.74	500.7	8.6	323	8	291.7	8.8	78.9	1.2	638	11	495.32	16.38	679.9	7.2
533.4	2.1	168.3	1.7	172	1	10.4	1.7	500.9	7.3	323	10	292	10	79.2	1.55	638	11	495.5	10	681	58
533.6	7.9	168.3	3.3	172.3	2.05	10.4	0.7	501.8	4.65	323	10	293	2	79.3	1.6	638	2.5	495.83	7.32	687	3
534	7	168.6	1.7	173	2	10.4	0.4	502	6	323	4	293.1	6.1	79.3	6.7	639	10	495.93	12.64	693	75
534.7	4.2	169.3	1.7	173	3	10.4	0.7	502	4	323	69	294	2	79.4	4.2	639	9	496	5	706	76
535	6	170.2	1.7	173	4	10.4	0.9	504	5	324	10	294	4	79.7	0.92	639	10	496.06	10.96	707	12
535.1	6	170.3	5.4	174	2	10.4	2.2	505	22	324	7	294	1.5	79.7	3.6	639	18	496.12	23.09	724	19
535.4	13.3	170.4	5.6	174	2	10.4	1.6	506	10	324	5	294	2	79.9	1.35	639	18	496.56	13.99	732	13
535.6	11.6	170.6	3.2	174	2	10.43	0.54	506.1	7	324	3	294	12	80	1.05	640	8.5	496.7	7.1	735	65
536	6	171.3	4.2	174	2	10.47	0.34	507	6	324.96	5.24	294.9	5.9	80	0.65	640	8.5	496.8	9.5	748	73
536.5	5.7	171.8	1.9	175	2	10.5	5.2	508	4	325	4	295	5	80	2	640	17	496.9	7.9	749	43
536.5	6.2	173	3	176	2	10.5	0.9	508	5	325	10	295	2	80.1	0.3	640	17	496.93	12.69	762	49
538.1	3.4	173.5	4	176	2	10.5	0.2	508	6	325	9	295	3	80.3	1.1	641	12	497	7	763	36
538.2	5.8	174.9	4.4	176	1	10.5	0.9	508	9	325	5	295.3	15.8	80.5	3.1	641	12	497	4	772	69
539.8	6.1	174.9	2.2	176	2	10.5	0.5	509.8	6.4	325.62	4.07	295.5	8.5	80.9	0.7	642	6.5	497	5	789	86
540	6	175.4	2.9	176.2	10	10.52	0.33	510	5	325.8	6	296	4	81	1.25	642	8	497.08	12.96	792	16
540.2	9.2	175.6	2.2	177	2	10.6	0.2	511	8	326	2	296	1.5	81	2	642	7	497.12	6.22	797	52
541	7	176	2	177	1	10.6	6.3	511.8	3.1	326	5	296	5	81.2	1.9	642	10	497.2	5.8	803	78
541.1	3.8	176	2	178	2	10.6	0.2	512	5	326	6	297	3.5	81.5	2.15	642	13	497.34	12.82	814	6
542.1	8.6	176.17	9.92	178	2	10.6	1	512	21	326	8	297	2	81.6	1.8	642	12	497.34	7.79	817	62
542.8	6.7	177.7	5.8	178	3	10.6	0.5	512	9	326	10	298	7	82	5.5	642	17	497.69	12.45	818	65
543	13.8	179.6	2.3	178	2	10.6	0.6	513	6	326	9	298	2	82.1	1.8	643	7.5	498	6	819	57
543.4	8.7	182.9	4.8	178	2	10.6	0.8	514	10	326	62	298	4	82.3	1.4	643	15	498	7	822	26
544	5	183	4	178	2	10.6	1.2	514	12	326	5	298.5	7.8	82.3	2.5	644	13	498	5	833	21
544.3	10.5	183	11	178	3	10.7	1.2	514.4	10.1	326.2	0	298.5	7.3	82.6	2.5	644	9	498.24	6.19	838	66
544.6	4.3	183.4	1.8	179	2	10.7	0.6	515	5	326.52	4.56	299.9	5.4	82.8	1.4	645	7	498.4	15.6	843	63
544.6	5.7	183.5	5	179	2	10.7	0.6	515	7	327	0.25	300	3	82.9	1.25	645	14	498.7	9.6	846	89
545	6	185	2	179	2	10.7	0.7	516	9	328	10	300	2	82.9	3.5	645	13	499	3	849	36
547	11	185	3	179	2	10.7	0.9	516.3	2.5	328	31	300	2	82.9	4.6	648	9.5	499	5	854	7
547	7	185.3	1.8	179	2	10.7	1	517	5	328.69	4.08	300	7	83	1.4	648	6	499	6	854	57
547	45	186.2	1.9	180	2	10.75	0.64	518	14	328.8	4.7	300.1	8.9	83	6.8	648	6	499	2.5	861.7	11.8
547.9	5.7	187	12	180	2	10.8	1.2	518	24	329	0	301	3	83.2	13	648	7	499.06	10.59	867	42
548	5	187	2	180	4	10.8	1.18	519.5	15.8	329	6	301	15.6	83.6	1.65	648	9.5	499.2	10.6	870	37
548	4.5	188	6	180	3	10.87	0.87	520	10	329	10	301	9.4	83.9	1.8	648	14	499.53	7.87	879	11
548.7	6.2	188	5	181	2	10.9	0.3	520	5	329	4	301.7	9.8	84	3.2	648	14	500	5	881	27
549.7	16.3	191	2	181	2	10.9	0.9	520.9	6.46	329	4	302	9.2	84	6	648	12	500.01	13.82	884	44
550	3.9	194	12	181	2	10.9	1.1	521	10	329	6	304	4	84.2	1.3	648	19	500.35	7.18	886	29
550	7	195.6	13.7	181	3	10.9	1.4	521.7	8.9	329.05	4.23	304	2	84.2	2.1	649	17	500.6	6.8	888	13
550	5	198	2.5	181	5	10.9	0.6	522	18	329.4	0	304	3	84.4	3.2	649	18	500.92	10.44	888	83
550	9.4	198	2	181	2	10.9	0.5	522.3	2.1	329.7	3	304.6	9.1	84.5	1.8	650	5.5	501	6	890	35
550	12	206.3	2.8	181	2	10.96	0.88	523	5	330	9	304.6	0	84.6	2.8	650	20	501	5	894.4	12
550.8	9.4	207	6	182	2	11	1.2	526	7	331	10	304.8	8.7	84.6	3.5	650	11	501.03	8.49	896	96
551	7	207.7	3.9	182	3	11	1.6	526.3	5.6	331	10	305	2	85	4.1	650	0.9	501.63	10.48	897	10
551.1	3.8	208	5	182	3	11	0.9	526.8	6.35	331	5	305.5	8	85.4	2.1	651	17	501.7	15.2	904	78
551.2	5.8	208.3	3.6	182	3	11	1.9	527	5	331.1	0	305.9	8.5	85.4	1.6	652	5	501.72	6.53	904	10
551.7	6.5	209	4	182	2	11	0.7	528	7	331.5	0	306	4	85.5	0.8	652	5	501.8	7.5	905	68
551.9	17.6	209	13	182.4	1	11	7.3	528	5	332	9	306	4	85.6	2.05	652	10	501.89	15.47	905	20
552	5	211	4	183	2	11	0.5	528	6	332.1	0.95	306	2	85.6	3.6	654	9	502	7	907	9
552.4	6.2	211.9	2.6	183	3	11	0.9	529	7.4	332.2	0	306	4	85.7	2.1	654	9	502	6	909.323	27.6539
553.8	9.6	212	6	183	3	11	3.6	529	8	333	8	307	2	85.8	2.4	654	9	502	5	910	35
554	7	212	4	183	3	11.02	0.29	530.5	7.9	333	10	307	3	86	6	655	9	502.37	11.05	910	66
554	7	216	4	183.2	1.2	11.1	1.3	530.6	7.3	333	6	307	2	86.1	3.2	655	26	503	7	914	61
554	5	216	8	183.7	2.25	11.1	2.3	531	7	333.56	4.7	307.4	8.3	86.1	4.3	657	5.5	503	5	914	66
554.6	6.7	216	9	184	2	11.1	0.7	531.6	5.8	334	10	308.8	11	86.4	3	657	29	503	5	915	69
556	6	216.1	2.8	185	2	11.1	0.4	532	7	334	10	309.9	8.8	86.4	1.3	658	10	503	7	915	60
556.3	1.45	221	4	185	2	11.1	0.3	532	7.6	334.8	5.42	310	5	86.7	2.4	658	18	503.09	11.09	915	92
557	557	222.5	7.6	185	3	11.1	0.7	533	6	335	5	310	2	87	6	659	11	503.6	5.2	916	64
557.3	1.6	223	6	185	2	11.1	0.6	534	7	336	8	311	3	87	6	660	11	504	6	918	31
558	5	224	8.2	185	2	11.1	0.8	534	6	336	45	312	9.1	87.2	1.5	660	11	504	7	918.8	14.1
558	29	224	3	185	2	11.1	0.5	534.1	16.2	336	5	312.2	7.5	87.3	3.1	660	1	504	6	919	38
558.9	3.7	225	152	185	4	11.1	1.8	534.3	17	336	3	312.2	10	87.5	32.7	660	13	504.05	15.92	919	33
559.2	4.1	225.7	4.4	185	2	11.1	0.8	535	5	336.3	0.4	313	4	87.5	10.1	661	13	505	7	920	22
560	6	226.2	3.6	185	2	11.11	0.65	535	11	337	4	313.6	7.1	87.5	4.4	662	4	505	7	921	22
560	6	227.13	2.1	185.2	1.9	11.16	1.58	535.8	13.7	337	9	314	4	87.7	1.5	662	18	505	5	922	34
560.8	9	228	4	186	3	11.2	0.9	536	2.55	337	4	314	3	87.8	5.1	662.75	0	505	6	922	9
562	9.27	229	5	186	5	11.2	1.6	536	6	338	18	314	9	88	2	663	15	505	5	922	53
562	6	229.9	2.9	186.2	4.3	11.2	1.9	536	4	338	9	314.4	8	88	1.9	663	18	505	5	922	39
562.89	12.06	230	4	186.4	3.35	11.2	0.8	536	6	338	10	314.43	11.06	88.1	1.8	664	16	505	5	922	31
563	6	230	3	187	2	11.2	4.6	537	6	338	4	315	3	88.2	1.95	666	5.5	505	6	923	4
563	7	230.8	2.4	187	2	11.27	0.73	537	6	338	5	315.7	9.9	88.2	2	666	15	505.84	8.31	924	45
563.7	5.5	233	14	187	5	11.27	0.86	537.2	4.25	338	5	316	4	88.4	1.4	666	17	506	4	925	56
563.7	15.3	235	4	187	2	11.3	0.8	538.9	6.75	338.29	5.17	316	4	88.5	5.1	666	11	506	5	925	18
563.8	11.3	235	13	187	3	11.3	0.6	539	7	338.87	5.01	316	2	89	1.75	666	1.1	506	5	925	32
564	12	236	15	187	3	11.3	0.7	539	7	339	10	316	10.9	89	0.75	666	2.5	506	6	926	115
564	5	236.6	3.5	187	3	11.3	0.9	539.9	6.61	339	15	316	9	89	3	667	9	506.3	16.1	926	52
564	6	237	6	187	2	11.3	2.2	541	11	339	4	316.1	9.5	89	6	668	12.5	506.5	7.5	928	20
565	6	237.4	3.6	187	2	11.3	1.3	541	7	339.9	0.6	316.4	10.2	89	2.5	668	12.5	506.73	9.29	929	20
566	17	238	3	187.1	3.2	11.3	2.16	542	6	340	10	316.8	10.3	89.2	4.5	668	25	507	5	931	16
567	5	239	4	187.6	4.4	11.3	1	542.5	6.3	340	0.42	317	11	89.3	3.2	668	25	507	4	931	93
567	8	239.4	2.6	188	2	11.4	1	543	21	340	9	317	5	89.4	2.6	668	9	507	5	931	54
567	8	240	4	189	2	11.4	1.3	543	6	340	34	317	5	89.5	1.3	670	14	507	5	931	29
567	5	240	5	189	3	11.4	0.2	544	0	340	4	317	5	90	0.81	670	13	507	4	931	89
567	6	242	6	189	2	11.4	0.6	544	2.9	341	88	317.3	10.9	90	2	671	20	507	3	933	53
568	6	242.2	3	189	3	11.4	0.2	545.4	7.57	342	9	318	5	90	1.5	672	18	507.66	7.11	934	71
568.4	8.06	242.39	5.3	189.1	1.35	11.4	1	547	5	342	9	318	4	90	2	672	12	507.71	8.79	936	21
569	11	242.5	3	189.6	4.2	11.46	2.43	548	7	342.4	0.8	318.1	9.3	90.1	1.95	675	17	508	6	936	10
569	7	243	6	189.7	2.35	11.48	1.43	549	7	342.65	4.28	318.2	0	90.2	1.04	677	12	508	9	939	98
569.6	10.7	243	4	190	2	11.5	1	550	10.1	343	3	318.3	11.7	90.7	2.45	677	17	508	7	939	6
570	11	243.3	5.8	190	3	11.5	1	550	7	343	9	318.3	8	90.8	1.35	677	24	508.1	24.6	939	26
570	7	244	3	190	3	11.5	2.4	550	6	343	10	318.5	7.6	91	1.5	677	1.5	508.92	5.79	940.2	12.6
570	7	245	3	191	2	11.5	1.4	550.3	17.3	343	10	319	3	91	2	678	13.5	509	7	941	42
570.2	13.2	245	16	191	2	11.5	6.1	550.4	7.29	343	4	319	3	91	2	678	16	509	5	941	81
570.5	6.9	246.7	4.1	191	3	11.5	2.8	553	8	343	4	319	4	91	2	679	12	509	5	943	10
571	11	247.7	2.7	191	5	11.5	1.1	554	7	344	0	319	5	91.2	1.5	680	9.5	509	5	943	30
571	7	248	7	192	2	11.5	1.06	554	0	344	8	319	11	91.3	1.9	680	15	509	4	944	64
572	6	248	7	192	3	11.51	0.64	554	9	344	5	319.5	15.1	91.4	1.95	680	19	509.6	9.5	944	81
572	6	248	4	194	3	11.56	1.8	554	8	344	40	319.6	19	91.4	1.4	680	13	509.7	9.2	944	28
573	10	248	6	194	2	11.6	2.3	554.9	6.5	345	9	320	5	91.5	2.2	681	6	509.9	6.6	944	10
573	7	248.6	6.8	194	3	11.6	1.8	555	7.06	345.5	0	320	3	91.6	0.75	682	20	510	4	945	35
575	11	248.9	2.4	194	3	11.65	0.65	556	5	346	6	320	3	91.6	3.9	683	28	510	3	948	69
575.2	12.7	249	3	194	4	11.7	1.8	556.5	7.03	346	9	320	5	91.6	1.1	683	16	510	7	949	10
575.3	7.7	250	8	194	6	11.7	1.4	558	9	346	3	320	3	91.6	2.4	683	15	510	2.5	949	70
575.8	10.9	250.8	3.4	194.1	2.2	11.7	1.2	559	7	346	4	320	5	91.7	6.8	683	8	510	5	950	33
576	6	251	13	194.3	9.5	11.7	0.6	561	6	347	7.5	320	3	91.8	2.45	684	0.9	510	5	951	38
576	3	252	16	195	2	11.7	0.6	561	7	347	58	320	3	92	2.3	685	14	510	3	951	40
576.6	8.6	252	3	195	3.4	11.7	0.5	566.2	4.5	348	0	320	5	92	2	686	28	510	5	951	36
577.4	9.9	252.3	7.7	195	3	11.7	1.3	568.8	1.9	348	121	320	5	92	2	687	14	510.3	14.4	952	34
579.2	7.6	254	3	196	2	11.7	2.4	571	6	348	4	320	4	92	1.5	688	13	510.3	10.3	952	102
580	6	254.1	7	196	2	11.74	0.74	575.4	6.5	349	9	320	4	92.2	3.4	689	18	510.44	12.99	953	63
580	8	255	17	196	2	11.8	1.9	578	8	349	10	320	5	92.4	1.2	689	20	510.52	7.15	953	38
580.1	7.7	255	4	197	2	11.8	0.4	581.7	3.8	349	4	320.3	10.4	92.5	6.8	690	13	511	6	953	59
581.45	6.4	255	8	198	3	11.8	1	582.1	7.5	349	4	320.5	6	92.6	1.5	691	13	511	5	953	69
582	6	256	8	198	3	11.83	1.46	583	7	349	5	321	3	92.8	1.6	691	19	511	5	955	59
582	6	256	3	198	5	11.9	3	583.5	8.1	350	9	321	5	92.9	4.6	693	16	511	9	957	12
582	6	257	5	199	2	11.9	0.9	585	13	350	9	321	5	93	2	693	11	511	5	957	60
583	7	257	7	199	3	11.9	2.7	585	7	350	5	321	4	93	2	694	1.1	511	3	958	21
583.2	12.3	258	13	199	2	11.9	0.7	586.5	8.14	351	4	321	5	93	2.5	695	13	511	5	958	11
584.1	7.2	258	4	199	3	11.9	0.2	590	6	351	7	321	3	93	1.5	695	19	511	5	958.9	14.7
584.7	15.65	259	5	199	2	11.9	1.1	596.5	7.29	352	2	321	3	93	2	695	13	511	5	959	69
585	6	259	9	199	3	11.9	0.9	601	7	352	4	321	4	93.3	2.1	696	14	511	3	959	35
585.2	11.1	259	5	199	4	11.9	1.5	602	7	352	11	321.3	7.4	93.3	0.7	696	13	511.1	16.4	959	13
586	5	260	4	200	2	12	1.8	603.7	6.7	352	4	321.8	9.5	93.4	6.8	697	15	511.9	13.3	960	35
587	8	260.1	1.35	200	3	12	1.6	604	8	353	7	322	3	93.5	2.4	698	5	512	5	961	48
587	1.5	261	4	200.1	2	12	0.6	607	26	353.73	5.5	322	4	93.5	1.3	698	14	512	16	963	59
588.81	10.98	261	5	200.5	1.65	12	0	608	6	354	5.5	322	5	93.7	2.25	698	10	512	13	963	23
589.2	6.5	261.9	3.9	200.6	1.5	12	0	608.5	5.6	354	3	322	5	93.7	2.3	698	24	512	6	963.3	13.2
590	6	262	4	201	2	12	1	610.3	7.59	354	6	322	9.5	94	1	699	16	512	4	965.8	12.7
590	5	262	7	201	2	12	3	611.4	7.5	355	4	322	33	94	1	700	15	512.7	13.5	966	33
590	6	262	4	201	2	12	0.6	615	6	355	9	322.4	10.7	94	1	702	13	512.7	7.92	966	4
590	7.2	262	6	201	2	12.01	1.57	617	9	356	5	322.8	9.8	94	3	702	15	513	5	967	18
590.32	6.11	263	4	201.1	1.65	12.05	1.81	618	8	356.55	5.32	323	5	94.6	1.15	703	17	513	7	969	18
591	15	263	4	201.1	3.5	12.2	4.7	619.8	17.7	357	9	323	4	94.6	1.4	704	13	513	5	969	33
592.2	11.8	263	3	202	3	12.2	3	620.2	7.75	358	7	323	3	94.6	3.3	704	18.5	513	6	972	43
592.6	8.1	263	5	202	3	12.2	0.8	622	8	358	13	323	3	94.7	2.05	704	13	513	4.9	973	34
593	7	263	4	202	3	12.2	0.5	622.1	7.66	358	57	323	3	94.7	1.6	705	12	513	6	973	76
593	6	263	5	202	3	12.2	0.3	624.2	6.95	360	3	323	4	94.9	2.45	705	24	513	5	973	87
594	6	263	3	203	2	12.3	0.5	625.3	8.6	360	4	323	5	94.9	2.45	705	12	513	3	973	38
594.8	11	263.3	5.9	203	2	12.3	2	628	6	360	4	323.9	0	94.9	1.9	706	10.5	513	5	973	31
595	12	264	4	203	3	12.3	10.1	628	10	360	4	324	4	95	2.2	706	21	513.4	4.9	974	53
595	5	264	5	203	4	12.4	1.9	630.5	6.8	360	4	324	3	95	2.05	707	24	513.6	5.3	974	87
595.6	12.9	264	5	203	3	12.4	1.7	632	7	361	3	324	4	95	1	707	15	514	4	975	8
595.92	11.94	265	4	203	2	12.47	1.16	632	6	361	4	324	4	95	2	707	20	514	5	975	64
596	9	265	4	204	2	12.5	0.8	636	8	362	4	324	5	95	1.5	707	10	514	5	976	38
596.2	11.9	265	4	204	2	12.5	1.2	638	7	362	9	324	7	95	2.5	708	9.5	514.27	7.32	977	85
596.8	7.1	265.9	6.1	204	1	12.5	1.2	638.9	7.15	362	4	325	5	95	2	708	10	514.37	8.12	977	91
597	6	266	7	205	3	12.6	1.5	639.2	8.23	363	12	325	3	95.1	1.85	708	9.5	514.58	9.32	978	52
597	13	266.4	7	205	3	12.6	1.1	639.4	7.3	364	4	325	4	95.2	1.2	708	10	514.66	7.19	978	30
598	7	266.6	2.4	205	3	12.6	1.7	642	8	364	4	325	3	95.3	1.5	708	20	514.78	6.55	979	33
598.3	12.9	267	4	206	5	12.7	1.4	643.3	7.7	364	4	325	4	95.4	0.85	708	20	515	5	980	34
598.8	11.9	267	5	206	3	12.7	1.9	655.4	7.8	365	10	325	3	95.6	2.2	708	19	515	6	980	37
600	8	267	3	206	3	12.7	0.6	662	21.7	366	9	325	3	95.9	1.45	708	19	515	4	982	50
600	6	268	5	206	3	12.7	0.8	666	8	366	7	325	4	96	3	709	4.5	515	5	982	60
600	5	268	4	206	1	12.75	0.63	667	7	368	3	325	4	96	3	709	14	515	7.5	982	9
600	6	268	4	206	10	12.76	0.43	668	8	368	34	325	6	96	1.5	709	9	515.2	6.7	983	19
600	6.9	268	3	206	3	12.8	1.7	669.8	7.6	368	4	326	5	96.1	3.3	709	21	515.9	14.1	983	28
600.1	14.3	268	4	207	3	12.86	1.04	677	8.32	368.46	10.48	326	4	96.2	1.15	710	21	516	7	984	34
600.3	8	268	10	207	3	12.9	1.8	679	63	368.8	0	326	2	96.3	3	711	13.5	516	7	984	42
600.85	8.52	268.4	5.2	207	3	12.9	0.8	679.7	8.6	369	14	326	11.4	96.3	4.5	712	13	516	5	984	48
601	10	269	5.9	207	2	12.9	1.5	683.3	10.9	370	2	326.4	8.2	96.4	3.7	712	14.5	516	5	986	72
601.5	13.1	269	3	207	3	12.9	1	687	17	370	49	326.7	8.1	96.5	2.1	713	14	516	6	987	52
603	6	269	4	207	3	12.9	2.1	687.6	2.9	370.28	6.14	327	11	96.6	2.25	713	19	516	5	988	19
603	17.2	269	4	207	4	12.95	0.81	688	8	371	1	327	4	96.6	0.65	713	14	516	5	988	45
603.3	12.2	269	3	207	3	12.99	0.66	689.9	17.7	371	4	327	3	96.8	2.3	714	11	516	5	989	44
603.8	16.3	269	5	207	2	13	2.5	692	7	373	4	327	6	97	2	714	19	517	8	989	33
604	6	269	6	207.7	1.2	13	0.7	695.3	18.2	374	5	327	3	97	1	714	15	517	6	989	61
604	8	269.3	3.7	208	3	13	0.3	697	8	375	48	327	4	97	2.4	714	29	517	5	989	31
604	20	269.9	3.9	208	2	13	0.5	697	8	375	5	327	5	97	1.1	716	16	517	7	989	34
604.8	5.6	270	4.8	208	3	13	1	697.7	8.3	376	90	327	3	97	6.5	716	10	517	3	989.6	12.9
604.8	7.8	270	4	208	5	13	1	697.9	8.4	376.83	6.22	327	5	97	1.5	717	4	517	5	989.9	14.1
605.4	0	270	4	209	2	13.02	0.27	703	7	377	11	327	3	97	9.1	718	7.5	517	4	990	11
606	6	270	4	209	3	13.1	2.1	704	9	378	3	327	5	97.1	2.45	718	19	517	5	990	42
606	6	270	4	209	2	13.1	0.8	711	6	380	4	327	4	97.2	1.1	718	20	517	4	990	30
607	6	270	4	209	3	13.17	0.52	712.8	8.1	380	8	327	4	97.5	1.5	718	15	517.1	13	991	40
607	19	270	3	210	2	13.2	1	719	8	380	63	327	4	97.8	3.5	719	7	517.2	13.8	991	15
607.4	11.2	271	5	210	3	13.2	1.1	721.9	20.4	380	5	327.1	0	97.9	2.25	719	5	517.4	9.5	991	49
608	6	271	3	210	1	13.2	1.4	726.1	8.7	382	1.5	327.9	7.5	98	1	719	24	517.7	5.2	992	36
608	8	271	4	211	3	13.2	0.7	728.1	20.6	382	7	328	4	98	3	719	14	517.77	12.13	992.34	27.5289
608	7	271	3	212	4	13.2	1.1	735	12	382	4	328	4	98	1.6	719	20	517.9	10.7	992.989	9.05434
608	6	271	5	212	1	13.2	0.5	736	16	383	1.5	328	4	98	2	719	19	518	6	993	137
608	24	271	5	212.2	2.65	13.2	1.5	743.1	9.55	383	5	328	3	98.1	2.2	720	19.5	518	6	993	94
609	6	271.4	3.5	213	3	13.23	1.14	746	8	384	1	328	15	98.2	1.8	720	15	518	6	993	18
609	7	271.4	2	213.5	3.5	13.24	0.66	750.7	8.5	384	11	328	13	98.2	0.95	721	25	518	6	993	36
609	17	271.8	5.5	213.9	4.9	13.3	0.6	751.8	8.2	386	5	328	10	98.3	1.2	721	9.5	518	5	993.1	14.8
610	6	272	7	214	3	13.3	0.8	761	8	386	3	328.1	19.7	98.4	2.1	722	30	518.1	16	994	11
610	5.5	272	4	214	3	13.3	1.7	761.2	4.4	386	3	328.3	9.8	98.5	2.6	722	20	518.21	7.22	994	47
610	15	272.7	7.9	214	4	13.3	1.1	762.6	10.41	386	10	328.9	18.2	98.7	1.8	722	5	518.25	7.61	995	49
610.09	5.68	272.7	2.8	214	3	13.3	2.2	763.9	14.8	386	8	329	3	99	1	723	7	518.8	7.2	996	45
610.47	8.2	273	3	215	2	13.3	0.8	766	8	387	1.5	329	4	99	0.57	723	9.5	518.9	13.7	996	32
610.7	0	273	4	215	2	13.3	5.5	769	1	387	3	329	4	99	1	723	1	518.9	17.7	996	76
611	5	273	6	215	5	13.4	0.8	769	17	387	15	329	4	99.1	5.8	723	19	519	6	998	115
611	7	273	3	215.6	1.65	13.4	13.5	769	20	388	33	329	6	99.4	2.45	724	22	519	6	998	24
611.59	13.46	273	4	216	3	13.4	0.6	769	9	388	12	329	4	99.5	2.2	724	29	519	7	998	8
612	8	273	4	216	4	13.5	0.8	769.9	8.7	390	1	329	3	99.5	5.8	725	4.5	519	13	998.7	12
612	6	273	4	216.1	1.65	13.5	0.6	774	9.2	390	10	329	5	99.7	2.5	725	1.4	519	5	999	29
612	7	273.6	3.5	217	2	13.5	2.4	774	10	391	5	329.2	12.6	99.8	5.3	726	30	519	5	1000	33
612.6	0	273.7	6.4	217	2	13.5	0.9	777	7	392	4	329.5	9.5	100	1	727	6	519	5	1000	24
613	8	274	4	217	4	13.5	1	777	8	392	5	329.9	0	100	2	727	14	519	6	1002	84
613	5	274	4	217	2	13.58	0.28	779	8	393	1.5	330	3	100.1	3.5	728	13	519	5	1002	86
613	6	274	4	217.3	1.6	13.6	0.8	779.8	10.4	393	1	330	4	100.2	5.3	728	20	519	4	1002	21
613	4.5	274	4	218	2	13.6	0.5	781	1.5	393	4	330	6	100.3	1.95	728	17	519	6	1002	49
613.4	13.9	274	6	218	4	13.6	1	781	10	393	4	330	4	100.8	2.5	729	7.5	519	7	1002	47
614	6	274	3	218	2	13.61	1.02	782.1	9.2	393	2	330	2	101	1.2	729	15	519.1	11.7	1002	39
614	6	274	7	218	2	13.61	0.35	783.1	10	393	10	330	4	101	1	730	21	519.5	6.6	1002.82	11.6981
615	8	275	4	218	3	13.7	1.1	785	9	393	10	330	3	101	3	732	13	519.51	7.12	1003	47
615.4	16.9	275	3	218	2	13.8	0.6	787	11.1	393	11	330	5	101.1	2.2	732	12	520	6	1003	4
616	7	275	6	218.9	6.6	13.9	0.6	787.1	12.2	394	3	330	4	101.2	2.8	733	14	520	6	1003	31
616	13	275	4	219	2	13.9	8.5	788.4	8.15	394	12	330.5	12.8	101.2	2.6	734	1.4	520	5	1004	32
616	5	275	8	219	2	13.9	0.5	788.4	9.8	395	31	331	4	101.2	1.1	734	16	520	7	1004	33
616	6	275	4	219	4	13.9	2.5	790.6	8.4	396	5	331	2	101.3	2.45	736	9	520	6	1005	18
616.9	7.1	275	8	219	6	14	0.7	792.1	10.2	396	8.5	331	4	101.4	1.6	736	13	520	6	1005	38
617	8	275.14	5.73	219	4	14	0.3	792.8	6.2	396	1.5	331	3	101.7	1.3	738	20	520	6	1005	66
617	7	275.6	4.6	219.6	4.3	14	9.4	793.4	9.5	396	7	331	3	101.8	2.35	740	16	520	5	1005	60
618	5	276	6	220	4	14	0.4	794	9	398	6	331.4	10.4	101.9	1.8	741	21	520	5	1006	57
618.5	13.3	276	5	220	4	14	1.4	796.9	8.8	398	10	331.5	5.9	102	1.4	741	28	520	5	1006	35
618.6	5.5	276	6	220	7	14	1.3	797.1	9.7	399	15	331.5	16.5	102.2	1.4	743	5	520	7	1006	47
619	3	276	4	220.8	1.6	14	1	799	1.5	399	10	331.9	0	102.3	1.4	743	10	520	6	1006	31
619	6	276	3	221	2	14	1.1	802	0.5	399	12	332	3	102.5	9.3	743	7	520	8	1006	27
619	5	276	4	221	3	14	0.6	802	0	399	12	332	3	103	1	744	28	520.1	6.3	1006	15
619	7	276	4	221	3	14	0.5	804	2	399	0.95	332	4	103	1.3	744	20	520.17	16.58	1007	57
619	7	276	4	221	3	14	1	804.9	10.3	399.4	0.7	332	4	103	1.95	744.67	0	520.3	9.4	1007	40
619	17	276	6	221	4	14	1	805.4	11	399.6	0.8	332	4	103.3	2.05	745	15	520.5	14	1007	16
619	16	276	11	221	3	14	2	806	16	400	4	332	11	103.5	1	746	6.5	520.5	7	1007	21
619.9	12.8	276.2	3.3	221	3	14.09	0.28	806.1	9.5	400	0.95	332.4	13.7	103.6	1.6	746	9	520.5	8.5	1007	76
620	6	276.7	4.1	221	2	14.1	0.3	807	21	400.1	1	332.6	12.2	103.8	1.6	746	9	520.7	15	1008	41
620	32	276.7	3	221	4	14.2	0.7	807	9	400.3	1.05	332.7	18.2	104	5.05	746.58	0	520.7	8.1	1008	28
620	6.4	276.8	3.3	221.6	1.8	14.2	0.3	807.9	9.1	401	20	333	4	104.6	2.45	746.68	0	520.7	9.27	1008	36
620.6	10.7	276.9	2.8	222	3	14.2	1.2	809.7	9.2	401	9	333	3	105	1.85	746.84	0	520.84	14.2	1008	38
620.8	11.6	277	3	222	3	14.2	1	810	9	401	51	333	4	105.6	1.6	748	16	521	6	1008.9	13.9
620.9	0	277	12	222	3	14.2	0.6	812.1	3.8	401	0.75	333	3	105.6	3.5	749	13	521	7	1009	11
621	5	277	3	222	2	14.2	1.6	813	8	401	6	333	4	105.7	1.6	750	6	521	9	1009	66
621	8	277	5	222	3	14.2	0.8	814.4	8.7	401.4	0.95	333	5	105.8	2.1	751	10	521	15	1009	11
621	8	277	4	222	4	14.2	0.9	815.1	10.6	401.8	0.6	333	9	105.8	1.65	751	10	521	6	1010	15
621	5	278	5	222	2	14.2	0.2	815.3	9.4	402	9	333.2	10.5	105.8	1.6	751	20	521	5	1010	18
621	3	278	4	222.9	4.8	14.25	2.23	822	10	402	85	333.7	10.7	106	2	751	20	521	5	1010	45
621.3	6.2	278	5	223	2	14.3	0.7	822	9	402	6	334	3	106	3	752	10	521.1	6.7	1011	27
622	3	278	8	223	3	14.3	0.5	823	10.4	402.5	0.9	334	4	106	2.7	752	14	521.46	6.17	1011.4	13.7
622	8	278	3	223	2	14.3	1	823	10	403	4	334	2	106	7.5	752.72	0	521.47	8.33	1011.54	9.08643
622	7	278	3	223	4	14.3	3.5	823.8	9.1	403	9	334	2	106.2	5.9	753.52	0	521.5	9.2	1012	37
623	7	278.3	2.6	223	2	14.3	0.8	824	9	403	9	334	4	106.2	7	754	8.5	522	3	1012.97	9.21879
623	6	278.5	3	223	3	14.3	1.1	826	6	403	21	334	4	106.3	2.4	754	7	522	5	1013	31
623.3	9.3	278.8	2.8	223	6	14.3	2.2	826	5	403.3	0.85	334	5	106.6	2.35	754	17	522	6	1013	52
623.74	10.36	279	18	223	3	14.3	0.5	826	9	404	4	334	4	106.6	5.5	754	11.5	522	6	1014	45
623.96	8.03	279	3	223	2	14.3	0.3	826.2	3.3	404	0.95	334	4	106.7	1.85	754.14	0	522	6	1014	34
624	8	279	6	223	2	14.33	1.08	827.8	9.9	405	11	334.1	10.7	107	1.3	755	16	522	3.5	1014	71
624	7	279	5	224	3	14.38	0.92	828	1.5	406	13	334.4	11.7	107.4	1.6	756	3	522.2	12.6	1014	7
624	7	279	7	224	3	14.38	0.52	829	21	406	11	334.6	13.9	107.5	1.65	756	14	522.4	7.1	1014	50
624.42	8.99	279	4	224	3	14.39	0.75	829.5	9.8	406	11	334.8	18.7	107.5	0.9	756	15	522.5	5.9	1015	69
625	6	279	3	224	2	14.4	0.9	831	22	406	5	334.9	6.5	107.6	1.3	757	4	522.6	9.3	1015	40
625	8	279	4	224	5	14.4	0.8	832	26	407	10	335	3	107.6	2.5	758	21	522.9	13.2	1015	142
625	4	279	4	224	6	14.4	0.4	832	6	407	12	335	4	107.9	1.4	758	10.5	522.9	6.5	1015	76
625	22	279	4	224	2	14.4	2.35	832	7	407	5	335	3	108	1	758	22	523	5	1015	61
626	18	279	5	225	2	14.5	0.5	833	11	408	13	335	4	108	4.2	758	15.5	523	6	1015	29
626.1	7.5	279	7	225	2	14.5	0.5	833	8	408	13	335	3	108.1	1.7	759	20	523	5	1016	13
626.2	10.6	279.4	7.8	225	4	14.5	0.9	834	21	408	13	335	4	108.4	1.55	759	24	523	5	1016	35
626.3	10.7	280	3	225	3	14.5	1.1	836	0	408	9	335	4	108.4	1.9	760	9	523	5	1016.28	8.70534
626.39	10.16	280	6	225	3	14.5	2.5	836.7	3.9	408.1	4.2	335	3	108.5	4.8	760	20	523	5	1017	26
626.4	9.2	280	5	225	3	14.5	2	837	10	409	12	335	2	108.6	2.3	760	12	523	5	1017	50
627	6	280	7	225	3	14.5	0.5	837	10	410	12	335	5	108.8	2.1	761	9	523	7	1017.3	9.53436
627	8	280.3	4.5	225	2	14.5	0.9	838	22	410	10	335	4	108.9	1.8	761	15	523.3	14.1	1017.35	12.2701
627	5	280.9	5.5	225	3	14.5	0.3	838	8	411	11	335	4	109	1	761	21	523.31	11.85	1018	52
628	8.5	281	6	225	2	14.5	3.7	838.2	9.9	411	11	335	5	109	2.6	762	12	523.4	5	1018	11
628	6	281.3	3.1	225	3	14.6	0.6	838.4	6.8	411	11	335	4	109	5	762	24	523.8	17.9	1018	70
628	7	281.4	4.2	225	4	14.6	0.7	839	10	411	13	335	3	109.1	0.9	763	20.5	524	7	1018	36
628.99	12.58	281.4	2.8	225.1	3.9	14.6	0.2	840	22	412	13	335	3.5	109.1	4.2	763	15.5	524	6	1018	32
629	3.5	282	4	225.4	2.25	14.6	0.2	840	11	413	13	335	5	109.2	0.67	763	11	524	6	1018	16
629	7	282	8	226	2	14.6	0.8	840	10	413	12	335.4	25.8	109.2	1.3	765	7	524	6	1019	17
629.12	9.81	282	7	226	2	14.6	1.1	840.7	10	413	5	335.5	10.3	109.3	2.6	765	14	524	5	1019	55
630	7	282	5	226	3	14.6	1	841.4	10.58	414	15	336	4	109.3	5	767	16	524	5	1019	44
630	19	282	5	226	2	14.6	1.7	841.9	10.7	414	9	336	4	109.4	5.2	768	1	524	5	1019	17.8
630.24	9.45	282	4	226	4	14.6	1.2	842	10	415	13	336	4	109.4	1.1	769	5	524	5	1020	12
630.5	7.9	282	4	226	3	14.6	1	843	9	415	13	336	4	109.6	7.9	769	18	524	6	1020	44
631	6	282	4	226.5	3.7	14.6	1.6	843	6.1	415	11	336	2	109.7	1.9	770	16	524	6	1020	95
631	7	282	4	227	3	14.6	0.9	844	9	415	13	336	4	109.7	6.4	770	13	524	4	1020.39	7.59766
631.6	13.1	282	7	227	2	14.7	0.3	844	8	415	12	336	2	109.8	1.8	770	20	524	7	1020.4	12.4
631.7	7.3	282	4	227	4	14.7	1	844	11	416	1	336	2	110	1.3	770	21	524.26	8.13	1020.68	9.0096
631.72	7.75	282.7	2.1	227	4	14.7	0.3	845	23	416	7	336	4	110.2	1.3	770	9	524.6	7.7	1021	52
631.75	6.84	283	7	227	5	14.7	0.9	845.7	10.28	416	11	336	4	110.2	1.55	770	12	524.6	8.6	1021	67
632	7	283	3	227	3	14.7	1.2	846	22	416	11	336	4	110.3	4.2	771	20	524.8	5	1021	88
632.4	12.5	283	5	227	3	14.7	0.3	846	22	416	13	336	4	110.5	3.75	771	16	524.8	5	1021	11
633	5	283	3	227.5	2.15	14.7	0.8	846	7	416	13	336	4	110.6	4.8	772	5	525	6	1021	34
633	6	283	8	227.6	6.5	14.7	0.3	847	22	416	11	336.8	7.2	110.8	1.5	772	22	525	7	1021.8	12.4
633.4	7.5	283.1	3.1	228	2	14.74	1.22	848	10	416	13	336.9	5.1	110.9	1.2	772	27	525	6	1022	56
633.5	14.8	283.2	6.6	228	3	14.78	1.81	848	7	416	15	337	3	110.9	2.4	773	18	525	7	1022	47
634	6	283.7	3.1	228	2	14.8	1.2	848	17	416	5	337	3	111	1.7	773	28	525	11.7	1022	68
634	4	283.7	2.9	228	3	14.8	1.8	848.8	10.4	417	9	337	4	111.1	3.2	773	5	525	6	1022	69
634	7	284	19	228	3	14.8	1.1	850	10	417	1	337	4	111.1	2	773	15	525	6	1022	19
634.2	6.4	284	7	228	2	14.87	2.1	850	22	417	12	337	3	111.2	2.55	774	10.5	525	5	1023	85
634.74	7.48	284	10	228	3	14.9	0.2	851	8	417	6	337	14	111.3	6.3	774	4	525	6	1023	15
635	7	284	5	228	3	14.9	0.3	851	22	418	13	337.9	10.3	111.3	4.6	774	17	525	5	1023	33
635	8	284	4	228	4	14.9	1.6	851.3	4	419	4	338	3	111.5	1.25	774	18	525	5	1023.24	11.1528
635	16	284	5	228	3	14.9	2.2	855	10	419	13	338	4	111.5	3.2	775	9	525	5	1023.66	7.97657
636	6	284	4	228	4	14.9	2.1	855	10	419	13	338	3	111.56	3.5	775	13	525	6	1024	40
636.2	10.06	284	7	228	2	14.9	1.6	855	10	419	15	338	5	111.7	1.65	775.63	0	525	5	1024	31
636.5	26.6	284	4	228	4	14.9	1.9	855	12	419	15	338	3	111.8	5.6	776	16	525	6	1025	48
636.69	5.81	284	4	228	6	14.9	0.5	855	6	419	74	338	3	111.9	7.6	777	4	525	6	1025	11
637	33	284.6	2.8	228	4	14.9	1.4	857	11	420	3	338	2	111.9	5.1	777	15	525	6	1025	5
637	33	284.7	11.8	228.4	1.8	14.9	0.7	857.6	9.7	420	11	338	2	112	2	777	6	525	8.2	1025	12
637.7	12.1	284.7	6.1	228.9	2.8	14.9	0.33	857.7	10.1	420	11	338	4	112	2	778	24	525.07	7.33	1025	40
638	13	284.7	5.4	229	2	14.91	0.65	858	10.1	420	13	338	7	112	2.4	778	13	525.3	15.3	1025	46
638	8	284.8	1.4	229	4	14.98	0.24	858	5	420	15	338	4	112.2	4.9	778	6	525.3	19.8	1025	76
638.3	7.2	285	3	229	2	15	0.7	858	6	420	9	338	3	112.6	7.9	779	8	525.67	6.29	1025.75	12.3664
640	22	285	14	229	2	15	0.5	858.8	19.6	420	6	338	4	112.6	5.8	779	12	526	7	1026	49
640.4	17.9	285	5	229	3	15	0.8	859	21	421	11	338	2	112.7	5.2	779	10.5	526	3	1026	18
641	4.5	285	3	229	4	15	1.5	859.1	9.5	421	13	338	4	112.78	1.5	779	33	526	6	1026	38
641	8	285	5	229	2	15	2.3	861	2	421	13	338	11	112.8	2.2	779	19	526	5	1026	65
641	6	285	4	229	4	15	1	861	9	421	13	338.5	0	112.9	2.2	779	11	526	6	1026	59
641.98	6.34	285	6	229	3	15	0	862	11	421	13	338.9	19.2	112.9	4.1	780	5	526	7	1027	8
642	8	285.1	3	229	3	15	1	863	79	421	10	339	3	113	4.9	781	15	526.01	8.89	1027	42
642	31	286	3	229	3	15	1	864	1.5	421	15	339	4	113.1	2.5	781	17	526.3	15.1	1027	21
642.3	13.1	286	4	229	3	15	2	864	9	421.3	7.7	339	4	113.2	2.4	782	23	526.35	6.93	1027	40
642.88	10.24	286	5	229	3	15	1	865.1	9.2	422	5	339	2	113.2	3.6	782	14.5	526.5	9.8	1027.36	9.48566
644	9	286	3	229.5	5	15	2	866	10	422	11	339	2	113.3	3.4	782	5	526.5	5.5	1027.8	13.9
644	3.5	287	4	229.8	2.6	15	2	866	22	422	11	339	3	113.6	1.4	782	13	526.9	12.6	1028	53
646	7	287	6	230	3	15	2	866	10	422	10	339	4	113.7	6.3	783	12	527	5	1028	20
646	52	287	4	230	2	15	1	868	9	422	7	340	3	113.7	2.2	783	5	527	6	1028	43
646.14	6.51	287	4	230	2	15	3	868	12	423	5	340	4	113.74	2	784	16	527	7	1029	74
646.28	8.44	287.4	5.6	230	2	15.01	0.79	868	22	423	13	340	2.5	113.8	3.1	784	7	527	5	1029	40
646.64	8.71	288	4	230	4	15.1	0.3	869	10	423	13	340	2	113.9	1.4	784	12	527	5	1029	91
647	8	288	9	230	4	15.1	0.6	870	12	423	13	340	5	114	0.81	784	21	527	5	1029	17
647.36	9.28	288	8	230.1	17.3	15.1	0.7	870.7	33.5	423	13	340	3	114.25	3	785	5	527	5	1029.1	11.1505
648	8	288	6	230.9	8.9	15.1	0.5	871	81	423	15	340	4	114.3	3.9	785	8	527	6	1029.63	8.81087
648.7	0	288	4	231	2	15.1	0.6	871	17	423	15	340	8	114.4	1.95	785	11	527	5	1029.67	9.07782
649	5	288	4	231	3	15.1	0.8	871	8	424	14	340.9	15.4	114.5	1.6	785	4	527.1	9.4	1030	31
649	12.4	288	3	231	2	15.1	1.5	872	9	424	13	341	2.5	114.5	2.4	785	6	527.7	11.6	1030	44
650	7	288	4	231	2	15.1	1.1	872	10	424	11	341	3	114.7	3.7	785	19	527.9	11.9	1030	7
650	6	289	4.8	231	3	15.1	0.6	872	10	424	14	341	2.5	114.7	5	785	11	527.9	9	1031	60
650	6	289	6	231	3	15.1	0.7	872	9	424	13	341	2	114.8	1.9	785	23	528	6	1031.09	11.9916
650.2	8.5	289	5	231	6	15.1	0.5	872.1	11.1	424	15	341	4	114.8	4.9	786	12	528	9	1032	12
651.48	7.69	289	4	231	1	15.1	0.6	873	17	425	13	341	4	114.8	4.1	787	6	528	5	1032	5
652	6	289	8	231	3	15.1	1.1	874	9	425	13	341	4	114.9	6.1	788	5.5	528	5	1032	45
653	8	289	7	231	3	15.1	1	874	11	425	13	341	4	115.1	2	788	12.5	528	5	1033	37
653.88	7.88	289	4	232	3	15.12	0.84	874	11	425	10	341	4	115.4	2.6	788	17	528	6	1033	43
654	6	289	4	232	3	15.19	1.27	874	8	425	10	341	17.4	115.4	4.3	788	11	528	6	1033	16
654	7	289	4	232	2	15.2	1.1	874.5	12.7	426	11	341.2	2.6	115.58	1.5	788	11	528	6	1034	12
654	7	289	4	232	2	15.2	0.8	875	9	426	13	341.3	19.1	115.7	3	789	13	528	6	1034	28
654	5	289	8	232	2	15.2	1.3	875.1	4.1	426	13	341.4	10.2	115.7	2.3	789	12.5	528	8	1034	43
655	7	289	5	232	3	15.2	0.9	876	11	426	10	341.9	7.1	116	1.5	790	5	528	7	1034.37	12.2898
655.2	15.4	289	7	232	3	15.2	0.2	877	11	426	5	342	4	116.1	2	791	14	528	10.5	1034.9	11.6947
655.45	6.16	289	5	232	3	15.2	0.4	877	14	426	5	342	2	116.1	2.9	791	17	528.1	5.1	1035	12
655.54	12.55	289.1	7.5	232	3	15.27	0.4	877.9	10.9	427	11	342	3	116.3	1.95	791	5	528.3	9.3	1035	61
655.62	14.56	290	19	232	3	15.3	0.9	878	9	427	14	342	2	116.4	2	791	12.5	528.37	9.45	1036	28
656	5	290	4	232	3	15.3	0.4	878	12	427	13	342	5	116.5	2.9	791	12	528.4	7.43	1036	8
656	8	290	8	232	4	15.3	1.3	878.8	4.1	427	13	342	3	116.6	2	792	11	528.5	5.1	1036	53
657	7	290	5	232	3	15.3	0.4	880.9	10.64	427	10	342	4	116.6	6.2	792	21	528.6	14.6	1036.05	12.0512
657.3	14.5	290	8	232.4	3.2	15.3	0.3	881	11	427	23	342	12	116.7	1.1	793	5	529	3.5	1037	41
657.46	10.7	290	4	232.7	3.8	15.3	0.3	881	11	428	16	342	12	116.9	3	793	11	529	7	1037	11
657.5	13.3	290	6	232.7	3.35	15.3	0.9	881	11	428	9	342.1	13.6	116.9	3.7	793	6	529	5	1037	11
657.8	8.9	290	5	232.7	2.3	15.3	0.7	881	5	428.66	5.36	342.3	15.4	117	2.5	793	12	529	5	1037	63
658	15	290	9	233	2	15.3	0.3	881	6	429	2.5	343	4	117	2.7	793	16	529	3	1037	72
658	5.5	290.8	7.8	233	2	15.3	0.2	882	10	429	12	343	5	117.1	9.41	794	9	529	7	1037	38
659	8	290.9	4.7	233	2	15.4	0.7	882	10	429	14	343	3	117.1	1.5	794	11	529	5	1038	46
659.1	6.7	291	4	233	2	15.4	0.6	883	81	429	13	343	3	117.2	6.4	795	13	529	6	1038.6	13.7
659.4	13.2	291	4	233	3	15.4	0.6	886	6	429	13	343	5	117.29	0.5	795	12	529	3	1039	56
659.9	4.2	291	7	233	3	15.4	0.9	886	28	429	8	343	4	117.3	3.3	796	6	529	5	1039	4
661	11	291	5	233	2	15.5	0.8	886	10	429.7	23.5	343	4	117.3	4.3	796	4	529	5	1039	42
661	5	291	13	233	3	15.5	0.6	886	82	430	5	343	2	117.4	1.6	797	14	529	6	1039.24	9.00606
661.6	13.9	292	3	233	5	15.5	0.7	886.4	15.4	430	15	343	4	117.4	2.1	797	11	529	6	1039.31	9.64713
661.68	9.42	292	5	233	2	15.5	1.8	887	9.9	430	14	343	5	117.7	2	798	18	530	7	1040	30
662.5	10.3	292	7	233	3	15.5	0.6	887	9	430	11	343	5	117.8	2.8	798	6	530	18.4	1040	10
662.5	8.2	292	4	233	3	15.5	0.6	888	82	430	11	343	7.6	118	2	798	21	530	3	1040	15
662.74	7.71	292	3	233	2	15.5	0.7	888	10	430	13	343	11	118	0.7	798	12	530	5	1040	14
663	5.5	292	4	233	5	15.5	1.8	888.2	12.1	430	13	343	12	118	2.7	798.1	0	530	6	1040	11
663.86	12.85	292	3	233	2	15.5	0.9	890	8.3	430	10	343.1	8.6	118	2.1	799	6	530	7	1040	51
664	7	292	5	234	2	15.5	0.2	890	10	430	16	343.5	13.4	118.1	1.75	799	19	530	5	1041	10
664	5	293	7	234	3	15.6	0.9	890	10	430	15.5	344	3	118.3	6.6	799	9	530	6	1041	13
665.52	9.95	293	4	234	4	15.6	0.2	890.9	10.59	430.4	4.7	344	4	118.3	2.15	800	4	530	6	1041	89
665.59	15.92	293	6	234	3	15.6	1.2	891	9	431	14	344	4	118.7	2.1	800	12	530	5	1041	7
666.45	7.75	293	5	234	3	15.6	0.3	891	68	431	13	344	5	118.7	2.05	801	27	530	3	1041	75
667	13	293	3	234	3	15.6	0.8	891.5	5.5	431	5	344	3	118.7	4.9	801	13	530	8	1042	15
667	9.5	293	6	234	3	15.6	0.3	891.9	12.1	431.4	6.31	344	3	118.9	3.4	801	3	530	6	1042	42
667	9	294	10	234	2	15.6	1.2	892	10	432	13	344	2.5	119	0	801	13	530	6	1042	4
667.3	14.3	294	5	234	3	15.6	0.6	892	18	432	13	344	3	119	4.1	801	12	530.1	10.7	1042.38	16.2527
668	5	294	5	234	6	15.6	0.8	893	10	432	16	344.7	8.9	119.2	1.3	801	18	530.6	7.3	1042.77	11.709
668	5	294	4	235	4	15.6	0.7	893	82	432	7	345	4	119.3	2.9	801	16	530.6	7.5	1043	45
668	12.5	295	4	235	3	15.6	0.5	893	10	432	13	345	4	119.4	3	802	9	530.8	7.6	1044	43
669	9	295	4	235	3	15.7	0.5	894	7	432	11	345	3	119.4	2.9	802	5	530.8	5.1	1044	74
669	5	295	4	235	3	15.7	1.2	895	9	432	41	345	7	119.5	3.1	802	20	531	3	1044	53
669	9	295	4	235	3	15.7	0.5	895	11	433	1.5	345	4	119.6	2	802	16.5	531	8	1044	38
669	5	295	3	235	3	15.7	1	895	83	433	14	345	4	119.7	3.2	802	15	531	6	1044.7	13.7
669	10	295	5	235	3	15.7	0.5	895	10	433	16	345	4	120	2	802	12.5	531	7	1044.71	39.5062
670	15	295.7	4.5	235	3	15.7	0.3	895	7	433	16	345	3	120.2	4.5	802	6	531	6	1046	80
670.3	27.4	296	4	235	3	15.7	2.3	896	10	434	11	345	4	120.5	6	802	14	531	7	1046	44
671	20	296	6	235	3.4	15.7	0.6	897	6	435	4.5	345.3	10.3	120.7	3.4	803	6	531	9	1046	46
671.2	6.63	296	4	235	5	15.8	0.6	898	10	435	14	346	5	120.9	8.5	803	6	531	5	1046	61
671.5	12.3	296	5	235	3	15.8	0.6	899	11	435	11	346	3	120.9	2.8	803	7	531	6	1046	68
672.36	8.44	296.05	4.12	235	4	15.8	0.5	899	10	435	13	346	5	121	0	803	6	531	6	1046	43
672.53	8.5	296.7	4.3	235	5	15.8	0.7	900	82	435	13	346	4	121.1	6.9	803	6	531	8	1047	71
672.6	13.7	296.79	3.08	235	5	15.8	0.5	900.4	11.22	435	16	346	4	121.4	2.1	803	9	531.3	15.9	1047	22
673	8	296.87	3.23	235	3.85	15.8	0.3	900.5	10.95	435	6	346	5	121.7	2.15	803	10	531.8	5.1	1047	40
673.3	8.1	297	5	235	2	15.8	0.6	901	10	436	8.5	346	4	121.8	1.5	803	10	532	8	1047.61	34.8026
673.5	17.2	297	8	235	3	15.8	0.6	901	8	436	8.5	346	6	121.99	3	803	19	532	7	1048	57
673.5	8.6	297	9	236	2	15.8	0.5	902	10	436	5	346.5	11	122.1	5.4	804	12	532	6	1048	11
676	7	297	23	236	3	15.8	0.5	903.4	8.15	436	7	346.6	6.5	122.48	2	804	13	532	6	1048	60
677	5	297	7	236	3	15.8	0.5	905	8.4	436	6	346.9	12.8	122.59	2	804	17	532	6	1048.12	29.2191
677	7	297	5	236	3	15.8	1.1	906	11	436	14	347	2.5	122.59	3.59	804	23	532	5	1048.56	14.609
678	24	297	5	236	3	15.8	0.9	906.9	12.6	436	11	347	3	123	1	804	15	532	20	1048.92	8.18537
679	6	297.44	2.7	236	3	15.83	0.36	908	9	436	13	347	4	123	0.64	805	12	532	6	1050	64
681	7	297.9	5.2	236	3	15.9	0.8	908.6	14.45	436	11	347	6	123.1	4.3	805	10	532	7	1051	46
681.5	7.7	298	37	236	3	15.9	0.8	909	9	437	5	347.6	13.6	123.3	2.6	805	15	532	5	1051	66
682	8	298	5.1	236	2	15.9	0.8	910	10	437	14	348	3	123.6	3	805	10	532	7	1051	75
682.6	0	298	4	236	2	15.9	0.4	910	16	437	11	348	4	123.9	5.8	806	5	532.1	6.1	1051	15
682.82	9.79	298	10	236	2	15.9	0.3	910.8	5	437	11	348	4	124	2	806	16.5	532.2	18.5	1051	5
683.45	8.47	298	5	236	2	15.9	0.8	911	5.6	437	79	348	3	125	1	807	8	532.5	0	1051	24
684	6	298	4	236.6	8.4	15.9	0.3	911	10	438	7.5	348	4	125	3	807	4	532.8	14.6	1051.72	41.8319
685	7	298	5	237	2	15.9	1.1	911	9	438	0	348	4	125.92	1	807	4	533	6	1052	33
685	5	298.2	3.8	237	4	15.9	8.3	911.5	10.8	438	14	348	5	125.92	2.06	807	14	533	6	1052	70
685.94	12.34	298.4	4.5	237	3	15.9	0.8	912	0	438	14	348	3	125.97	2	807	29	533	5	1052	49
688.9	25.2	298.67	1.99	237	3	15.9	0.4	912.3	6.4	438	28	348.3	6.4	126	1	807	16	533	6	1053	65
689.4	12	299	4	237	3	15.9	0.3	912.3	11.1	438.87	5.44	348.3	12.5	126	1.65	807	4	533	5	1053	31
690	20	299	7	237	3	15.9	0.7	912.7	3.8	439	11	348.8	0	126.3	3.1	807	15	533	6	1053	7
690.55	16.93	299	4	237	3	16	0.8	913	11.3	439	13	348.9	14.5	126.4	0.85	808	5	533	5	1053	38
691	8	299	4	237	3	16	0.2	913	9	440	8	349	4	126.4	4.3	808	7	533	5	1053.86	12.0378
692	5.5	300	7	237	2	16	0.7	913.1	12.6	440	8	349	5	126.6	4.7	808	4	533	19	1054	62
692.5	24.6	300	3	237	4	16	0.4	913.7	11.36	440	6	349	2.5	127	2	808	5	533	16	1054	37
693	6	300.2	3.6	237	3	16	0.8	915	10	440	15	349	10	127	2	808	4	533.2	6.6	1054	67
693.19	8.29	300.42	3.03	237	5	16	0.7	915	11	440	14	349	5	127	2	808	15	533.37	7.82	1054	46
694.1	7.1	300.82	3.37	237	3	16	0.4	915.8	11.44	440	16	350	4	127	1	809	3	533.41	5.33	1054	100
695	6	301	4	237.1	5.9	16	0.5	916	13	441	8	350	4	127	2	809	10	533.7	10.8	1054	18
695	9	301	3	237.2	2.05	16	2.5	916	11	441	7	350	3	127.4	4.4	809	16	534	7	1054.3	30.2133
695	6	301	4	237.5	7.5	16	1	916	10	441	7	350	4	127.8	3	809	17	534	13.2	1055	8
695.45	8.25	301	10	237.7	3.9	16	1	916	10	441	11	350	3	127.9	3.2	810	26	534	6	1055	40
695.7	16.3	301	6	237.8	1.9	16	2	916.6	11.22	441	5	350	4	128	2	810	12.5	534	6	1055	33
696	6	301	4	238	3	16	1	917	12	442	8.5	350	5	128	1	810	13	534	5	1055	61
696.97	10.41	302	2.1	238	3	16.1	0.5	917.9	4.3	442	5	350	2.5	128	2	810	4	534	5	1055	77
697.09	7.05	302	9	238	2	16.1	0.6	919	7	442	8	350	3	128	2	810	12.5	534	5	1055.61	14.2041
698	6	302	21	238	3	16.1	1.4	919.2	4.3	442	8	350	4	128.2	7.6	810	24	534	6	1056	79
699	9	302	4	238	4	16.1	0.7	919.9	8.1	442	14	350	4	129	2	810.17	0	534	7	1056	40
699	6.5	303	21	238	2	16.1	0.5	920	86	442.15	6.16	350	9	129	2	811	24	534.1	9.8	1056	30
700	7	303	4	238	4	16.1	0.6	920.3	3.4	442.62	5.69	350	11	129	3	811.14	0	534.3	7.5	1056	94
701	10.5	303	8	238	2	16.1	1.4	921	24	443	5	350.36	7.94	129	2	812	6	534.3	8	1056	36
701.6	13	303	5	238	12	16.1	2.7	921.1	9.8	443	14	350.4	8.9	129	2	812	5	534.9	9.8	1056	78
701.9	0.9	303	5	238	17	16.1	1.3	922	40	444	8	350.9	14.2	129	9	812	4	534.9	13.3	1056.21	9.18857
702	5.5	303	3	238.4	7.6	16.1	1.1	922	7	444	2.5	351	4	129.1	6	812	16	535	4	1056.84	12.3302
702	5.5	303	4	238.9	6	16.2	0.8	923.8	4.6	444	7.5	351	3	129.3	1.95	812	18	535	6	1057	7
702.44	12.33	303	4	239	3	16.2	0.8	924	25	444	7.5	351	4	129.5	5.1	812	4	535	5	1057	75
703.3	1.4	303	4	239	3	16.2	0.6	924	7	444	14	351	4	129.6	12.8	812.91	0	535	14	1057.51	11.5382
704.1	0	303	7	239	3	16.2	1.1	924	11	444	9	351	8.5	130	2	813	6	535	5	1058	50
705.5	18.2	303	3	239	2	16.2	0.8	924	11	445	7.5	351	13	130	1	813	16.5	535	7	1059	32
706	5.5	303.8	11.1	239	3	16.2	0.8	924	9	445	195	351.8	23.7	130	2	813	17	535	6	1059.85	9.09524
707	6	304	4	239	3	16.2	0.9	924.8	10.1	445	6	352	3	130.29	2	813	10	535	6	1060	29
707	8	304	7	239	3	16.3	0.7	925	10.5	445.24	6.3	352	5	130.29	4.1	813.54	0	535	6	1060	43
707	34	304.1	10.4	239	3	16.3	2.1	925	18	445.89	6.53	352	3	130.6	5.5	814	6	535	6	1060	40
709	10.5	305	21	239	4	16.3	3.1	925	9	445.98	3.99	352	4	130.8	1.5	814	19	535.2	6.9	1060	84
709	20	305	4	239	4	16.3	1.9	926	12	446	4.5	352	14	130.8	3.13	814	14	535.9	6.2	1060	47
710	10.5	305	4	239	4	16.4	0.8	926.4	11.3	446	11	352.3	16.9	130.8	4.3	814	4	536	6	1060	22
710	11	305	4	239	5	16.4	0.8	926.6	3.1	446	7.5	352.6	8	131	2	814	8	536	5	1060	25
710	30	305	4	239	4	16.4	0.9	928	4.3	446	9.8	352.8	18.1	131	2	814	6	536	5	1060.35	9.14012
711.98	9.46	305	4	239	2	16.4	0.4	928	10	446.8	0.8	353	4.5	131	2	814	17	536	5	1061	9
712	6	305	6	239	1	16.5	1.1	928.6	4.55	447	8	353	4	131	2	814	14	536	13	1061	39
713.2	9.3	305	6	240	3	16.5	0.5	929	10	447	7	353	5	131.4	8.6	814	10	536.2	6.9	1062.28	13.4852
715	17	305	5	240	3	16.5	0.4	929	11	447	5	353	4	131.7	8	814	3	536.2	8.5	1063	97
715	8	306	4	240	3	16.5	0.4	931	7	447	72	353	5	132	2	814.65	0	536.8	7.3	1064	11
716	13	306	4	240	3	16.5	0.7	932	10	447.5	5.2	353	4	132	1	815	3	536.8	13.7	1064	44
716.5	10.8	306	5	240	3	16.5	0.4	932	12	447.9	0	353	5	132	1	815	4	537	7	1064	39
717	13.5	306	6	240	3	16.54	0.48	932	7	448	5	353	4	132.3	3	815	21	537	6	1065	58
717	10.5	307	4	240	4	16.6	2.1	933	13	448	7.5	353	4	132.9	5	815	4	537	10	1065	41
718	5.5	307	4	240	4	16.6	1.7	933	8	448	11	353.5	25.8	132.9	6.9	815	25	537	3	1065	7
718	5.5	307	8	240	4	16.6	2.1	933.6	11.5	448	14	354	4	133	2	816	21	537	7	1065	42
719	7	308	4	240	4.45	16.6	0.5	933.9	12.14	448	16	354	4.5	133	1	816	22	537	7	1065.2	18.4
719.5	4.2	308.7	2.9	240	2.55	16.6	0.5	934	11	448	16	354	4	133	1	816.24	0	537	6	1066	31
720	31.5	309	20	240	12	16.7	0.8	934	7	448	110	354	3	133	1	816.57	0	537	6	1066	12
720	10.5	309	7	240	5	16.7	0.5	934	8	448.8	5.82	354	3	133	1	817	13.5	537	5	1066	5
720	7	309	4	240.8	2.05	16.8	0.6	935	11	448.83	6.78	354	4	133	2	817	16.5	537	5	1066	43
720	9	309.7	3	241	3	16.8	0.6	935	10	449	9	354.5	13.4	133	1	817	18	537	7	1067	28
720	6	310	7	241	3	16.8	0.5	935	11.58	449	3	354.8	21.1	133	1	817	13	537	6	1067	81
720.1	0.75	310	7	241	2	16.8	0.7	936	15	449	16.5	355	4	133.1	3.2	817	26	537	5	1067	63
720.89	12.86	310	6	241	4	16.9	1.4	936	12	449	14	355	4	134	1	817	3	537.4	7.6	1067	71
721	40	310	8	241	2	16.9	1	936	8	449	6	355	3	134	2	817	14	537.6	7.8	1068	45
721	7	310.5	8.1	241	3	16.9	1.1	936.8	4	449	7	355	3	134	2	817	14	537.9	8.7	1068	4
721	5.5	310.6	0.45	241	3	16.9	0.5	937	4.35	449.04	5.13	355	4	134	2	817.23	0	538	6	1068	30
721	7	311	7	241	3	16.9	0.7	937	34	449.3	6.03	356	3	134	2	818	4	538	6	1068	76
721	13.5	311	7	241	3	17	0.3	937	11.89	449.52	7.28	356	4	134.1	1.7	818	17	538	7	1068.41	9.26564
721	4.2	311	4	241	6	17	1.4	937	10	449.63	6.55	356	13.6	134.14	2	818	5	538	5	1069	61
722	7	311	19	241	3	17	1.8	938	87	450	72	356.2	12.2	134.7	3.6	818	37	538	5	1069	40
723	24	312	5	241	5	17	1	939	11	450	10	356.3	6.4	135	1	818	3	538	5	1070	62
723	6	312	4	241	3	17	0.3	939	86	450.2	0	357	7	135	2	818.4	1.55	538	6	1070	109
723	15	312	3	241	3	17	1.4	940.5	10.68	450.3	1.3	357.5	12.8	135	2	819	12.5	538	9	1070	25
724	18	312.89	37.07	241	16	17	0.3	940.8	11.4	450.8	4.65	357.9	21	135	2	819	17	538.1	20.9	1070	41
724	6	313	4	241	4	17	1.5	941	6	451	7	358	6	136	2	819	18	538.1	10.2	1070.2	15.7
724	9	313	17.5	241.4	1.7	17	0	941	12	451	8	358	15	136	1	819	5	538.1	7	1071	84
725	13	313	19	241.5	5.3	17	2	941.6	7.05	451	29	358.1	15	136	2	820	21	538.33	7.6	1071.39	9.37396
727	9	314	4	242	3	17	1	942	14	451	58	358.27	7.11	136	1	821	12	538.9	12.6	1072	21
727	7	314	6	242	2	17	1	943.3	11.4	451.85	5.97	358.33	15.56	136	1	821	23	539	6	1072.08	11.7866
728	11	314	5	242	3	17	1	944	9	451.9	11.1	359	5	136	2.5	821	26	539.7	6.7	1073	58
728.8	1.4	315	4	242	3	17	0.3	944.4	5.65	452	14	359.4	10.3	136	2	821	6	539.8	12.9	1074	35
729	14	315	29	242	3	17.1	0.3	945.9	11.04	452	6	360	3	136.6	0.6	821	13	540	6	1074	33
729	12	316	5	242	3	17.1	0.3	946	6	452.4	0	360	4	136.7	6	821	16	540	6	1074	5
731	6	316	3	242	3	17.1	1.3	947.1	4.9	453	7	360	4	137	1	821	28	540	7	1074	5
731	6	316	4	242	3	17.12	0.74	948	10	453	7	360	4	137	4	822	16	540	5	1074	30
732	10.5	316.6	7.3	242	2	17.2	0.3	948	11	453	7	360	4	137.2	2.7	822	22	540	7	1074	35
733	6	317	11	242	3	17.2	0.3	948.4	11.33	453	7.5	360	12	138	2	822	11	540	6	1074.81	9.78415
733	5.5	318	6	242	3	17.2	0.9	949	11	453	11	360	12	138	2	822	9	540	7	1075	39
733	6	319	5	242	4	17.2	1.1	949	11	453	6	360.1	0	138	1	822.62	0	540	13.8	1075	60
734.1	6.4	319	5.8	242	4	17.2	0.7	950	11.93	453.91	6.18	360.3	33.6	138	1	822.73	0	540	14.3	1075	5
735	5	319.5	7	242	4	17.2	1	950	12	454	7.5	360.4	15.8	138	1	822.85	0	540.3	19.1	1075.16	9.61767
735	14	320	4	242	4	17.2	0.4	950.8	9.1	454	7.5	360.7	24.6	138	4	823	9	540.3	8.1	1076	14
735.65	15.04	320	7	242	5	17.2	1.6	951	24	454	15	361	18	138.1	2.3	823	19	540.9	10.6	1076	96
736	6	320	9	242	6	17.3	0.8	951	4.55	455	8	361.6	13.6	138.39	1	823.63	0	541	9.4	1076	36
736	6.5	320	5	242	3	17.3	0.8	951	10	455	14	361.7	12.4	138.39	2.34	824	22	541	6	1076	96
736	6.5	320.3	4.4	242	3	17.3	0.8	951.2	8.9	455.75	6.65	361.8	6.1	138.6	8.9	824	20	541	7	1076	28
736	8	320.9	3.1	242	5	17.3	3.7	951.5	4.4	456	8.5	362	5	138.6	2	824	20	541	6	1077	85
736	7	321.1	6	242	3	17.39	2.33	952	13	456	12	362	6	138.85	1	824	10	541	7	1077	24
736	5.5	322	5	242	3	17.4	1	952	10	457	0.28	362.6	15.1	138.85	1.79	824	34	541	5	1077	76
736	23	323	5	243	3	17.4	0.9	952.4	23.5	457	7.5	362.6	12.5	139	1	824.76	0	541	5	1077	69
737	16	324	5	243	3	17.4	1	953.1	14.3	457	7.5	362.7	9.9	139	1	825	4	541.2	2.7	1077	45
737	7	324.61	3.14	243	3	17.4	1	953.2	18.2	457	5	363	14.7	139.6	10.6	825.81	0	541.3	9.6	1078	33
737	6	325	4	243	3	17.4	0.9	953.9	10.7	457	9	363	12	140	1	826	11	541.3	19.4	1078	36
737.34	11.88	325	4	243	3	17.4	0.6	954	9	457	14	363.3	14.2	140	2	826	11	541.5	6.8	1078	17
738	25	325.7	1.9	243	3	17.4	1.1	954	10	457	3.5	363.8	13.6	140	1	826	4	541.8	14.1	1078	32
738.09	11.64	326	40	243	2	17.5	0.5	954.7	4.45	457.13	6.21	363.8	11.1	140	1	827	5	542	7	1079	12
738.4	0	327	4	243	3	17.5	0.5	954.9	6.85	457.17	5.52	363.8	14.1	140	1	827	13	542	6	1079	52
739	10	327	3	243	3	17.5	0.4	955	8	457.2	4.2	364	4	140	1	827	12	542	5	1079	55
739	6	327.7	3.4	243	3	17.5	0.4	956	19	457.26	5.87	364	0	140.2	0.95	827.28	0	542	6	1079	67
739.2	6.3	329	5	243	4	17.6	0.7	956.1	11.31	457.4	3.3	364.4	11.3	141	2	828	16	542	3	1079	83
739.8	8.2	329.74	3.71	243	2	17.8	0.4	956.8	5.2	457.7	0	365	5	141	1.75	828	5	542	7	1080	81
740	6	329.8	3.3	244	4	17.8	1	957	10	457.96	7.95	365.1	9.9	141	2	828	24	542	6	1080	38
740	6	330	21	244	3	17.9	0.9	957	19	458	5	365.5	8.4	141	1	828	17	542	3.5	1080	43
740	8	330	5	244	3	18	0.8	957	10	458	14	365.6	7	141.54	4.5	828	26	542	6	1081	40
741	10.5	331	6	244	3	18	0.5	957	10	458	88	365.7	16.4	142	1	828.23	0	542	6	1081	81
741	7	331	4	244	3	18	0.5	957	12	459	6	366	4	142	2	828.95	0	542.2	17.5	1081.52	9.24225
742	14	331	7	244	3	18	1	957.3	5.55	459	7.5	366.3	11.3	142	1	829	5	542.45	10.86	1082	106
742	9	331.02	5.78	244	4	18	1	957.9	10.5	459	12	367	4	142	4	829	5	542.6	10.4	1082.76	10.1242
742	6	332	5	244	4	18	1	958	10	459	39	368	3	142.4	50.8	829	13	542.9	14.6	1083	80
742	6	332	7	244	5	18	1	958.3	10.3	459	58	368.3	22.4	142.69	1	829	13	543	8	1083	236
743	6	332	3	244	6	18	2	959	10	460	59	368.7	10.5	142.69	2.33	830	6	543	4	1083	70
743.5	14.1	333	8	244	2.9	18	3	959	0	460	59	368.87	8.09	143	3	830	17.5	543	5	1083	61
744	8	333.3	3.2	244	2	18	1	959.6	7.55	460.1	3.97	369	5	143	4	830	55	543	6	1083	5
744	6	334	4	244	3	18	1	960	89	460.23	5.97	369.9	14.8	143.22	1	830	20	543	5	1084	55
744	5.5	334.83	3.04	244	2	18	2	960	23	460.58	6.8	370	4	143.79	1	830	25	543	5	1084	13
745	14	334.89	4.54	244	5	18	1	960	11	460.66	7.82	370.7	12.9	143.79	1.57	831	7	543	6	1084	5
746	6	335	8	244.3	5.4	18.1	0.8	960	12	461	14	371.4	10.4	144	5.8	831	4	543.1	9.5	1084	36
747	12.5	335.5	2.7	244.3	4.8	18.1	0.6	960.2	11.7	461.13	6.21	372	2.5	145	1	831	11	543.2	27	1085	20
747	14	336	5	244.7	2.8	18.2	1	960.4	8.15	461.55	7.04	372.1	12.4	145.6	7.3	831	13	543.6	6.8	1085	15
747	5.5	336.2	2.8	244.9	2.35	18.2	1.4	961	12	461.7	5.15	373.5	15.2	145.7	10.8	831	13	543.8	7.3	1085	5
747	6	336.5	4.2	245	3	18.4	1.2	961	10	462	7	374	4	145.8	1.14	831	13	543.9	10.5	1085	66
747.4	10	337	21	245	4	18.4	9.5	961	10	462	7.5	374.9	7.4	146	2	831	10	544	3	1085	38
748	16	337.4	7.6	245	2	18.4	0.56	961	13	462	7.5	375	4	146.04	1	831	11	544	6	1085.08	25.9104
748	7	337.8	9.2	245	2	18.5	0.4	963	11	462	4	375	11.3	146.04	1.59	831.62	0	544	5	1085.74	12.7444
748	10.5	338	5	245	3	18.5	4.3	963	10	462	7.5	375.3	10.5	146.3	1.95	832	10	544	7	1086	11
748	6	339	11	245	2	18.5	0.4	963.1	11.8	462	7.5	375.3	13.1	146.9	2.5	832	6	544	6	1088	46
748	7	340	42	245	5	18.9	5.5	963.3	10.3	462	60	375.5	23.1	146.9	4.51	832	20	544	6	1088	50
749	8	340	7	245	2	18.9	5.5	963.7	12.5	462	9	375.7	10.4	146.9	13.3	832	16	544.2	12.5	1088	29
750	9	340.3	20.4	245	2	19	0.5	964	10	462	6	376	4	147.2	5.2	832	21	545	7	1088	28
750.7	5.9	340.42	4.98	245	8	19	1	965	9	462	6	376	24	148	1	832	18	545	7	1089	80
751.36	12.15	340.59	4.84	245.3	1.5	19	1	965.4	10.2	462.2	4.55	376.1	9.8	148	2	833	14	545	5	1089.23	13.1006
752	4.5	343	8	245.4	2.5	19	2	966	12	463	6.5	376.39	15.46	148.37	1.5	833	4	545	5	1090	67
752	4.2	343.9	9	245.5	4	19	2	966	13	463	7.5	376.4	19.1	148.37	2.94	833	13	545	3	1090	102
752.5	7.9	345	5	246	3	19	1	966.2	5.3	463	5	376.7	9.8	148.8	2.1	833	10	545	6	1090	7
753	16	345	6	246	3	19	1	966.6	7.85	463	56	377	7	148.83	1	833	29	545	15	1090	21
753	10.5	345	4	246	2	19	1	967	11	463.1	4.8	377.7	11.7	148.83	1.77	833	23	545.2	18.3	1091.3	8.00527
753	7	345	8	246	3	19	2	967.1	18.8	463.35	6.35	378.2	6.9	149	11.5	833	24	545.9	14.9	1091.51	9.34554
753.4	6.3	345.65	3.59	246	4	19	1	967.7	13.05	463.4	3.35	378.7	10.3	149	3	833	11	546	3	1092	7
753.4	11	347	5	246	2	19	1	967.8	11.65	463.5	1.2	378.7	13.6	149	5	833	14	546	6	1092	8
754	10.5	348.8	5.4	246	3	19	1	968	9	463.8	0	378.9	24.8	149.6	8.9	833	5	546	7	1092	4
755.2	6.1	349	5	246	3	19	1	968.4	10.6	464	5	378.9	0	149.8	7.8	833	15	546	7	1092	70
755.5	8	349	4	246	3	19	1	968.8	10.4	464	7.5	379.7	12.9	150	1	834	17	546.2	7.2	1092	14
755.8	5.5	350	8	246	3	19	1	968.8	18.1	464	8.5	379.9	10.7	150	2	834	4	546.9	7.6	1095	12
756	14	351	44	246	4	19	1	969	15	464	7.5	380	16	150	2	834	6	547	7	1095.24	49.8455
756	9	351	6	246	6	19	1	969	10	464	7.5	380.3	13.9	150.5	3.5	834	18	547	5	1096	93
756	14.5	351	5	246	5	19	1	969	10	464	5	380.64	11.36	151	2	835	8	547	9	1096.58	9.60257
757	15	351	12	246	2	19	1	970	45	464	15	381	4	151	2	835	14	547	6	1097	13
757	11.5	353	14	246	3	19	1	970	11	464.1	1.9	381.1	6.2	151	1.1	835	22	547.2	3.2	1098	54
758	12.5	354	10	246	3	19	1	971	13	464.22	6.45	381.2	12.2	152	13	835	8	547.7	13.4	1098	61
758.04	13.34	354	6	246	5	19	1	971	21	464.5	3.35	381.9	16.8	152	5	836	5	547.8	13.3	1098.3	8.10653
760	13.5	354	4	246.2	8.2	19	1	971	11	465	8.5	382	5	152	4	836	5	548	6	1099	18
760.9	14.7	355	5	247	2	19	1	971.1	10.7	465	7.5	382.8	11.1	152.1	7.2	836	7	548	8	1099	82
761	12.5	355	4	247	7	19	1	971.2	12.2	465	7.5	382.9	17.5	152.6	1.8	836	4	548	6	1099	214
761	10.5	356	8	247	3	19	1	971.9	7.9	465.1	4.75	384	12	153	2	836.61	0	548	7	1099	46
761.9	5.9	357	5	247	2	19.6	3	972	10	465.6	4.85	384.5	43.2	153	2	837	4	548	6	1099	58
762	11	357	5	247	3	20	1	972.9	12.02	466	7	384.6	14.3	153	6	837	28	548	13	1100	50
762	17	357	6	247	3	20	0.5	973	9.15	466	7	385	4	154	4	837	4	548.1	7.4	1100	38
762	156	358	6	247	4	20	0.5	973	10	466	3.5	385	8	154	4	837	21	549	6	1100	64
762.6	11	359	5	247	3	20	2	973	11	466	7.5	385.2	7.4	154	3.4	837	5	549	5	1100	21
763	11	360	6	247	4	20	3	973	12	466	7.5	385.4	15.1	154.3	2.9	837	17	549	6	1101	28
763.7	8.13	361.4	0.4	247	4	20	2	973	11	466	7	385.8	18.3	154.37	2	837	7	549	7	1102	11
763.8	4.6	361.5	3.6	247	6	20	1	974	11	466	7	386	4	155	2	837	18	549	7	1102	44
764	10.5	361.76	5.35	247	7	20	1	974	12	466.4	1.75	386	4	155	4	837	13	549	8	1102	18
764	15.5	362	5	247	5	20	3	975	13	466.55	5.86	386.6	10.3	155	4	838	9	549	2	1103	21
764.4	14.5	362	4	247	5	20	1	975	9	466.98	8.07	386.7	9.9	155.9	10.4	838	33	549.2	6.1	1103	31
764.4	15.7	362.2	5	247	2	20	1	976	28	467	0	386.9	7	156	3	838	4	549.5	13.3	1104.84	26.3109
765	10.5	363	6	247	4	20	1	976	24	467	7.5	387	16	156.2	1.8	838	4	549.5	7.4	1105	50
765.7	12.6	363	4	247.1	2.25	20	2	976	11	467	7.5	387.5	15.2	156.3	6.4	838	1.7	549.7	5.8	1106	46
766	15	363	9	247.6	8	20	1	976.1	6.6	467	5	387.5	12.5	156.9	4.1	838	4	549.8	5.3	1106	56
766.7	6.2	363.81	4.94	247.7	3.9	20	1	977.1	11.1	467	4	387.9	12	157	0	838	10	549.8	6.5	1106	32
767.13	9.25	364	4	248	3	20	1	978.4	6.4	467	28	388	4	157	2	838	15	550	9	1106	21
767.21	12.52	364.7	9.2	248	3	20	1	978.8	12.8	467.21	6.91	388	0	157	6	838	23	550	6	1106.27	9.46103
767.6	9.6	365	4	248	3	20	1	979	10	467.3	4.9	388.1	16.1	157	1.6	838	20	550	7	1106.44	9.41475
768	26	365	5	248	3	20	1	980	22	467.8	2.35	388.1	10.2	158	2	839	4	550	6	1107	20
768	15	365	8	248	2	20	1	980.2	12.5	468	7.5	388.9	13.6	158	5	839	5	550	5	1107	69
768	10.5	365	6	248	3	20	1	981	20	468	10.5	389	24	158	4	839	6	550.5	8.7	1108	13
768	12.5	365	12	248	3	20	1	981.9	4.55	468	7.5	389	15	159	9	839	6	550.7	12.4	1108	40
769	10.5	365.81	7.34	248	3	20	1	982	6.75	468	7.5	389	6	159	12.6	839	6	550.7	17.1	1108	24
770	10.5	365.9	4.9	248	5	20	1	982	9	468	14	389.3	11.9	159.4	4.6	840	7	550.8	10.9	1108	41
770	10.5	366	7	248	4	20	1	982.6	11.1	468	5	390.71	16.4	159.6	2.9	840	17	551	7	1109	82
770	10.5	366	5	248	7	20	1	983	10	468	8	390.8	18.6	160	2	840	23	551	5	1109	33
770.2	9.6	366	5	248	4	20	1	983.4	4.55	468.2	4.9	391	10.6	160	4	840	13	551	5	1110	89
771	6.5	366	13	248.2	9	20	1	983.6	5.5	468.4	8.45	391.62	2.78	160	5	840	5	551	6	1110	17
771	17.5	366	7	248.6	7.6	20	1	984	12	468.6	6.3	391.7	9.8	160	4	840	13	551	10.8	1110.96	9.76828
771	17	366	6	249	2	20	1	984	10	468.8	5.45	391.7	18.6	160.3	2.4	840	17	551	11.9	1111	87
771	21	367	7	249	4	20	1	984	11	469	4	391.8	11.9	161	2	841	14	551.1	38.3	1111	38
771.84	14.97	367	4	249	3	20	1	984.3	16.55	469	7.5	392.2	11	161	4	841	23	551.5	17	1111	68
773	10.5	367.18	6.54	249	3	20	1	984.4	4.55	469	4	392.5	29.1	161.2	9.4	841	4	551.5	21.8	1111	21
773	10.5	367.48	3.9	249	3	20	1	985	10	469.3	6.08	392.6	13.8	161.7	2.95	841	13	551.8	23.4	1111.24	13.3892
773	21	367.7	7.5	249	3	20	1	986	8	469.4	1.1	393.2	16.2	161.8	2.8	841	6	552	9	1111.6	17.9
773	14	367.91	6.43	249	4	20	1	986.8	12.85	470	8.5	393.9	15.1	162	4	841	13	552	5	1112	16
773.1	8.2	368	5	249	2	20	1	986.9	8.6	470	7.5	394	4	162	2	841	6	552	6	1113	21
773.25	12.82	371	4	249	3	20	2	987	10	470	7.5	394	5	162.1	5.2	841	4	552	6	1113	21
773.47	6.6	371.82	10.15	249	4	20	1	987	11	470	11	394	6	163	4	842	21	552	6	1114	29
774	18	372	6	249	4	20	1	987.8	5.3	470	16	394.1	16.5	163	2	842	10	552	16	1114.74	10.1205
774	6.5	372	17	249	2	20	1	988	13	470	11	394.4	14.2	163	4	842	17.5	552.1	17.8	1115	32
774	10.5	373	4	249	2	20	1	988.5	18.7	470	6	394.5	19	163.7	1.25	842	18	552.25	10.51	1115	32
775	10.5	373	5	249	2	20	1	989.4	9.2	470.3	4.2	394.7	15.7	163.9	2.45	842	12	552.4	7.1	1115	65
775.2	7	373	6	250	5	20	1	990.2	3.7	470.7	12.2	394.9	23.7	164	0	842	17.5	552.6	15	1115	84
775.4	16.4	373	7	250	4	20	1	991	4.6	470.9	2.15	394.9	14.2	164	3	842	11	552.7	16.2	1115	8
776	10.5	374.4	1.35	250	3	20	1	993	12.05	471	7.5	395	4	164.5	1.22	842	4	552.7	9.5	1115	61
777	29	376	4	250	3	20	1	994	4.6	471	7.5	395	5	165	2	842	6	553	13	1115	15
778	10.5	376	5	250	4	20	1	995	20	471	7.5	395	6	165	6	842	16	553	5	1115	34
778.5	6.5	376.5	9	250	2	21	0.5	995	9	471	7.5	395.3	9.3	165	3	843	14	553	6	1116	72
779	10.5	377	12	250	3	21	0.5	995.1	4.6	471	6.5	395.3	7.9	165	2	843	6	553	7	1116	51
779	10.5	377	4	250	3	21	1	996	0	471	6	395.3	7	165	2	843	14	553	10	1117	61
779.1	6.5	378	4	250	5	21	2	996	13.3	471	6	395.5	13.8	165	4	843	12	553.4	13.7	1117	20
780	6.5	378	4	250	2	21	4	996.1	4.6	471.1	7.05	395.5	11.2	165.5	4.1	843	16	553.6	17.3	1117	71
781	12.5	378.2	12.2	250	2	21	1	996.9	10.7	471.3	5.2	395.6	25.3	166	1	843	28	553.83	13.08	1117	57
781	6	379	5	250	6	21	2	997	13	472	7.5	395.6	11.7	166	4	843.5	0	553.9	8.3	1118	68
781	17	379	12	250.4	9.7	21	1	997	13	472	8	395.8	35.8	166.3	2.5	844	16	554	7	1118	30
781	10.5	380	3.5	250.4	2.8	21	1	1000	7	472	8	395.8	11.3	166.4	2.6	844	11	554	6	1118	68
781.6	13.1	380	5	250.5	6.8	21	1	1000.6	10.05	472	7.5	396	18	166.8	2.3	844	4	554.1	9.4	1118	180
781.8	8.3	380	7	251	3	21	2	1001.6	11.7	472	7.5	396.1	15.2	167	3	845	3	554.13	10.72	1119	17
781.9	7.6	380	4	251	3	21	1	1003	0	472.1	4.4	396.2	7.5	167	3	845	11	554.63	5.46	1120	86
782	6	380.8	5.4	251	2	21	1	1005	10	472.1	5	396.3	11.8	167	5	845	16	554.9	6.9	1121	21
782	10.5	381	4	251	3	21	1	1005.5	10.9	472.5	8.55	396.8	17.1	167	5	845	1.8	555	5.3	1121.12	10.7229
782	10.5	381	7	251	3	21	1	1006	9	472.65	6.43	396.8	7.5	167.1	3.35	846	6	555	3	1121.3	9.54601
782	12.5	381	9	251	4	21	1	1006.1	7.85	472.92	6.89	396.8	9.3	167.4	8.3	846	10	555	4.5	1122	35
782.5	10.7	382	5	251	3	21	1	1007	10	472.97	6.09	396.9	13.6	167.9	8	846	11	555	7	1122.97	29.7811
783	10.5	382	4	251	3	21.1	1.5	1007	9	473	8	397	4	168	2.1	846	14	555.1	6.7	1123	98
783	11.5	382	4	251	6	21.2	1.1	1008	12	473	7.5	397	4	168	1	847	9	555.4	8.05	1123	27
783.1	7.2	382	7	251	4	21.3	0.7	1009	23	473.3	7.95	397	13	169	0	847	10	555.6	5.7	1123	17
783.3	6	383	5	251	2	21.5	2.1	1010	34	473.47	6.11	397.1	10.3	169	2	847.97	0	555.8	9.4	1124	64
784	5	383	4	251	4	21.5	2.1	1014	10	473.9	8.7	397.4	15	169.4	2.8	848	9	556	10	1125	7
784.3	11.6	384	5	251	7	21.5	1.5	1014.3	7.25	474	7	397.7	0	169.6	11.1	848	16	556	3.5	1125	54
785	11.5	384.71	7.81	252	2	21.6	1	1016	11	474	5	397.8	11.9	170	2	848	17	556	7	1125	31
785	6	385	8	252	3	21.8	0.5	1016.3	14.2	474	6	398	10	170	2	848	16	556.1	9.4	1125	11
785.8	5	385	10	252	3	21.8	1.9	1019	0	474	6	398	18.2	170.4	2.6	849	6	556.25	7.16	1125	73
786	12.5	385.7	10.4	252	3	21.8	0.6	1019	13	474	8	398.1	11.4	170.6	3.6	849	12	556.3	21.7	1125	27
786	16	385.8	18.8	252	3	22	2	1019	8.75	474.1	8.8	398.1	10.7	171	11	849	5	556.5	9	1125	34
787	16	386	9	252	3	22	0.5	1019	13	474.1	8.6	398.1	11	171	5	850	8	556.7	6.8	1126	35
787	15	386.8	6.4	252	3	22	1	1019	23	474.4	5.15	398.6	11	171.3	4.2	850	15	556.8	16.8	1126	43
787.7	7.1	387	0	252	4	22	3	1019.8	7.6	474.64	6.07	398.8	16.4	172	22	850	7	556.8	9	1127	20
788	6	387	5	252	5	22	2	1020	39	474.87	6.14	399	4	172.7	0.95	850	7	556.87	15.97	1128	11
788	13	387	14	252	3	22	2	1023	11	475	7.5	399	29.7	172.9	5.6	850	30	556.9	6.9	1129	34
789	12	387	6	252	3	22	1	1023	19	475	7.5	399.1	11.9	173.1	4.2	850	17.5	557	14.5	1129	13
789	8.6	387.1	8	252	3	22	1	1024	22	475	19	399.5	23.2	173.6	3.4	850	5	557	7	1131	98
790	6.5	387.6	0.2	252	3	22	2	1024	12	475	8	399.8	14.2	173.9	6.9	850	18	557	7	1131.27	23.9614
790.6	4.2	387.91	5.22	252	3	22	2	1025	41	475.2	5.4	400.1	9.2	174	5	850	11	557	7	1131.5	14.7
791	6	388	12	252	3	22	1	1025	28	475.3	5.05	400.5	10.4	174	6	851	12	557	28.1	1132	20
791.5	4.3	388	4	252	3	22	1	1027.5	7.1	475.4	8.7	400.6	10.5	174.4	14.6	851	11	557	4	1132	37
791.9	9.1	388.9	8.8	252	3	22	2	1028.1	11.5	475.4	7.85	400.7	7.8	174.6	8.5	851	11	557.18	10.25	1132.21	9.61456
792	8	389	5	252	3	22	2	1029	11	475.6	5.8	400.9	7.3	175.3	4.3	851	7	557.3	8.8	1133	37
792	3.5	389	4	252	3	22	1	1029.4	7.7	475.7	5.85	401	6	175.6	3.2	851	4	557.3	10	1134	57
792	11.6	389	5	252	6	22	1	1030	44	475.89	7.43	401	8	175.6	3.2	852	34	557.5	10.5	1134	83
792.7	8.7	389	5	252	6	22	1	1031	12	476	11.6	401	22	175.6	3.2	852	12	558	7	1134.1	14.9
793	14	389.7	6.5	252	8	22	1	1032	12.85	476	10	401.2	16.7	176	2	852	8	558	9.5	1135	49
794	4.5	390	7	252	2	22.3	0.8	1032	19	476	7.5	401.7	11.9	176	6	852	19	558.8	10.1	1135	47
794.07	21.36	390	4	252	6	22.4	0.3	1033	0	476	4	402.1	0	176.5	2.5	852	4	559	11	1135	91
794.21	14.45	390	4	252.4	2.05	22.6	1	1033.8	12.3	476	8	402.2	15.4	176.7	9.5	852	12	559	3.5	1136	54
795.6	11.19	390.3	4.7	252.6	5.2	22.7	0.6	1034	12	476	8	402.5	6.3	177.6	2.1	853	19	559	12	1136	14
795.6	8.4	390.49	4.26	252.7	3.05	23	1	1034	12	476	14	402.5	9.8	178.6	6.8	853	16	559	13	1136	7
795.75	10.33	391	6	253	3	23	0.5	1035.1	7.4	476	4	402.5	0	178.7	2.3	853	16	559.2	10	1136	50
796	28	391	5	253	3	23	1	1035.9	12.5	476	2.75	402.8	12	179	6	853	23	559.4	6.8	1136.8	15
796.3	6.2	391	11	253	3	23	1	1037	27	476.75	5.95	402.82	18.3	179	3	854	24	559.5	10.6	1137	8
796.9	13.1	391	4	253	3	23	1	1040	25	476.8	10	402.9	8.9	179	5	854	11	559.7	12.5	1137	71
797	6	391	4	253	3	23	1	1041	6	477	11.5	403	5	179.5	2.5	854	34	559.8	29.9	1138	21
797.57	9.73	392	4	253	3	23	1	1042	24	477	5	403	13.2	180	2	854	7	560	5	1138	41
798	7	392.5	4.9	253	3	23	1	1042	21	477	27	403.2	8.6	180	7	854	15	560	7	1139	34
798	366	393	6	253	3	23	2	1042	19	477	4	403.4	19.6	180	12	854	17.5	560	3	1139	57
798.4	9.2	393	5	253	3	23	1	1042.4	11.6	477	22	403.6	10.3	182	12	854	4	560	8	1140	116
799.7	13.2	393.53	3.42	253	6	23	1	1044	13	477.3	8.55	403.6	7.4	182	5	854	37	560.1	9.3	1140	6
800.3	10.5	394	25	253	5	23	1	1044.4	12.35	477.8	5.55	403.7	12.1	182.2	1.99	855	8	560.2	12.2	1141	74
800.4	8.1	394	4	253	3	23	1	1045	13	478	8.5	403.9	11.7	182.4	16.2	855	16.5	560.38	7.56	1142	51
800.6	8.7	394	21	253	3	23.2	1	1045	12	478	5	403.9	12	182.4	16.8	855	14	560.5	18.7	1143	65
800.7	7.2	394	5	253	2	23.5	1.9	1045.2	11.4	478.1	8.55	404	4	182.7	2.9	855	12	560.9	34.3	1143	65
801	8	394	4	254	3	23.5	0.8	1045.7	33.1	478.16	5.89	404	12.7	183	0	856	5	560.9	14.5	1144	65
801.2	6.9	394.9	7.37	254	3	23.6	0.6	1046	16	478.6	4.5	404	20	183	55	856	4	560.9	32.2	1144	46
801.5	5.8	395	5	254	3	23.6	1.4	1046.2	11.6	478.7	5.85	404.05	2.49	183	9	856	17.5	561	8	1144	11
802	11	395	4	254	2	23.7	2.2	1046.6	11.8	479	10	404.1	14	183	2	856	27	561	6	1145	23
802	16	395	10	254	4	23.8	0.53	1047	11	479	6	404.1	17	183	5	856	8	561	6	1147	17
802.2	6.7	396	4	254	3	24	0.5	1050	15	479	14	404.2	13.9	183.1	2	856	12	561	7	1147	103
803	9	396	6	254	3	24	0.5	1051	9	479	8	404.5	11.3	183.6	1.85	856.06	0	562	6	1148	51
803	15	396	5	254	4	24	1	1051	13	479.13	7.35	404.73	13.86	183.6	1.65	856.22	0	562	7	1148	52
803	5.3	396	8	254	3	24	1	1052	9.1	479.4	11.7	404.8	10.9	183.99	4	857	17.5	562	7.3	1148	49
803.6	7.1	397	27	254	5	24	1	1052.9	11.85	479.59	5.67	404.9	20.1	184	3	857	19	562.2	3	1148	52
804.7	6.9	397	6	254	3	24	2	1053	10	479.7	5	404.9	19.5	184	13	857	16	562.6	12.8	1149	7
805	17	397	5	254	2	24	3	1054	11	479.99	6.01	405	4	184.3	3.1	858	18	562.7	8.7	1150	108
805	8	397.19	4.4	254	10	24	1	1054.4	12.59	480	8	405	5	184.4	15.6	858	11	563	10	1151	42
805	8	398	5	254.4	3.1	24	3	1054.4	4.85	480	4	405	4	185	12	858	43	563	8	1151	11
805.2	10.7	398	7	255	3	24	4	1054.4	13	480	8	405	4	185.3	4	858	7	563	10.7	1151	18
806.9	7.4	399	7	255	2	24	1	1056	98	480	10	405	8.2	185.6	1.9	858	16	563.1	8.9	1151	29
807.9	19.9	400.2	1.45	255	3	24	1	1057.6	6.8	480.22	5.98	405	11.9	185.7	3.9	858	13.5	563.8	31.2	1151.04	9.76104
808.06	10.7	400.53	7.63	255	4	24	2	1058	12	480.8	5.65	405	11	186	5	859	11	563.9	8.5	1151.28	13.5217
808.5	7.2	401	5	255	3	24	1	1058.6	21.3	480.8	5.7	405.3	17.2	186	2	859	14	564	10	1152	22
808.8	6.2	401.7	7	255	3	24	1	1061.2	13.7	480.9	4.2	405.3	0	186	5	859	22.5	564	6	1153	17
808.9	7	402	12.8	255	3	24	2	1062	11	481	3	405.5	16.3	186.3	8.3	859	9	564.2	6.9	1154	34
809	9	402	6	255	4	24	1	1062	17	481	4	405.6	11.6	186.8	2.35	859	4	564.3	18.2	1154	53
809.41	12.27	402	4	255	4	24	1	1062.5	11.7	481	3	405.9	13.2	186.8	3.25	859	14	565	6.9	1155	43
810	9	402	5	255	6	24	1	1063	14	481	8	406	19	186.9	13.1	860	17	565	7	1155	13
810	8.9	402	8	255	6	24.1	1.7	1064	30	481	19	406.3	13.7	187	0	860	17.5	565	17	1156	35
811	7	402.5	8.3	255	7	24.2	0.6	1064.4	11.4	481	6.5	406.6	9.6	187.2	14.3	860	16	565.1	10	1156	4
811.3	6.5	402.8	12.6	256	3	24.3	1.8	1066	31	481.1	5.9	406.65	3.92	188	0	860	14	565.64	5.77	1158	17
811.4	10.4	403	5	256	3	24.35	2.19	1067	37	481.2	6.1	406.8	16.6	188	13	861	17	565.7	13.3	1158	63
812.5	8.3	403	5	256	3	24.4	0.9	1067	14	481.55	4.76	407.2	11.3	188	12	861	11	565.8	14	1158.67	12.9711
812.5	17.3	403.05	3.55	256	3	24.5	1.1	1068	26	482	27	407.2	8.6	188.1	6.9	861	6	566	7	1158.75	10.2332
814	10	404	10	256	2	24.6	0.3	1069	11	482	5.5	407.5	10.8	188.3	4.2	861	10	566	3	1159	11
815	17	404.5	11.6	256	3	24.7	0.3	1070.6	12.48	482	8	407.51	15.1	188.53	3	861	18	566	9	1159	76
817	199	405	5	256	4	24.8	0.8	1070.7	13.65	482	31	407.73	15.95	189	6	861	11	566.2	3.6	1159.69	11.944
817.3	9	405	10	256	3	25	0.5	1074.6	30.25	482	4	407.9	11.1	190	3	862	8	566.3	6.9	1160	17
818	7	405	7	256	3	25	1.5	1075	24	482	7.5	408	4	190.2	3.35	862.25	0	566.4	7.1	1160	20
818	6	405	5	256	3	25	1	1075	0	482	11	408	20	191.2	19.8	863	12	566.4	7.52	1161	40
819	9	405	4	256	4	25	1	1076.7	12.1	482.2	5.45	408	6	191.8	2.2	863	11	566.9	22.9	1162	55
819.3	12.4	406	5.5	256	5.8	25	1	1076.9	7.65	482.4	1.7	408.6	12.6	192	6	863	16	567	7	1163	85
820	485	406	15	256	6	25	1	1078	12	482.8	5.5	408.7	12.8	192.1	2.75	863	7	567	19.1	1163	54
820.1	11	407	5	256	2	25	1	1078.1	7.55	482.8	4.2	408.96	17.92	192.3	3.95	863	25	567	14	1163.13	10.1721
820.2	8.8	407	5	256	3	25	1	1078.2	11.5	483	11.7	409	5	192.9	4.9	863	14	567	6	1164	57
820.4	8.6	407	4	256.1	4.95	25	1	1079	18	483	11.8	409	5	193.1	8.1	864	12	567.1	8.5	1164.17	12.8745
821	14	407	5	256.2	2.05	25	1	1080	20	483	2	409	4	194.1	2.85	864	13	567.1	18.8	1164.46	11.5558
821	7	407.2	3.9	257	3	25	2	1081	28	483	7.5	409	5	194.1	2.7	864	7	567.5	6.4	1165	5
821.2	20	408.3	12.1	257	3	25	1	1082	15	483	3	409	12	194.3	1.45	864	16	567.8	7.43	1166	13
821.9	4.7	408.7	4	257	3	25	2	1082.2	11.8	483	3	409.1	11.8	194.7	1.85	864	11	567.9	9.7	1166.9	15.3
822.4	8.8	408.85	5.44	257	3	25	1.7	1083	13	483	4	409.16	22.47	195	14	864	10	568	6	1167	21
823	6.5	409	4	257	3	25.03	1.12	1087	66	483.27	6.94	409.4	2.3	195	6	864	10	568	11.5	1167	17
824	11	409	6	257	5	25.07	0.65	1088	22	483.4	11.7	409.4	6.8	196	6	864	13	568.2	18.3	1168	12
825	22	410	6	257	9	25.1	1.5	1088	11	483.67	4.55	409.8	18.4	197	9	864	17	568.8	20.5	1168	43
827	12	410	5	257	5	25.1	0.3	1089	28	484	11	409.9	22.5	197	13.5	864	22	568.93	17.65	1170	25
827	32	411	5	257	6	25.4	2.5	1090.5	4.2	484	16	410	20	198	3.35	865	8	569	6	1170.94	12.5664
827	5.5	411	4	257	2	25.5	0.9	1091	13	484	10	410	8	198	15	865	15	569.1	17.1	1171	37
831.4	8.5	411	5	257	3	25.8	1.7	1093	12	484	11	410.3	11.7	198	4.2	865	12	569.1	16.7	1171	10
831.5	12.3	412	5	257	2	25.8	1.5	1097.6	18.3	484	7.5	410.4	12.5	198.1	1.56	865	24	569.3	12.1	1171	8
832	10	412	6	257.1	8.6	25.9	1	1098	12	484	4	410.71	2.49	199	28	865	23	569.5	17.9	1172	59
832.37	15.95	412	5	257.4	5.7	26	1	1098.5	12.8	484	5	410.8	8	199.8	15.2	865	7	569.5	24.9	1173	88
832.6	6.9	413	9	257.5	14.5	26	0.5	1098.6	23.5	484	9	410.9	13.1	200	15	865	5	569.6	6.3	1173.75	9.96493
832.8	8.7	413	13	257.9	11.2	26	0	1102	18	484.2	2.3	411	5	201	5	865	13	569.88	5.09	1174	99
833.5	9	413	20	258	3	26	1	1102.8	7.35	484.4	3.95	411	12	201	13	866	22	570	3	1174	29
833.63	10.62	413.13	9.97	258	3	26	1	1104	24	484.68	6.16	411.3	12.5	201.1	13.9	866	20	570	22	1176	98
833.9	8.1	413.2	1.15	258	4	26	1	1106	0	485	37	411.53	16.71	201.2	5.4	866	14	570.1	17.6	1177	37
834.4	13.3	413.31	7.45	258	3	26	1	1107.7	7.75	485	6	411.7	13.7	202	15	866	21	570.2	5.8	1177	62
834.5	15.1	414	5	258	3	26	1	1107.9	4.3	485	10	412	4	202	14	866	16	570.2	8.4	1177	75
835	20	414	6	258	3	26	2	1108.8	6.05	485	2.5	412	4	203	2.7	866	17	570.4	13.2	1178	67
836	11	414	5	258	6	26	2	1109	11	485	3	412	2.5	203.3	2.6	867	5	570.9	13.9	1178	35
836.6	8.2	414	4	258	3	26	1	1109	23	485	2	412	4	203.4	5.3	868	4	570.9	19.8	1178	120
837	6.5	414	6	258	2	26	2	1110	7	485	24	412	2.5	203.4	16.4	868	19	571	7	1178.81	8.78086
837	12.4	414.7	11	258	2	26	1	1113	14	485	32	412	7.5	205.2	15.4	868	21	571	6	1179	24
837.8	15.8	415	17	258	4	26	2	1113	31	485	3	412	8.6	205.2	3.9	868	14	571	7	1179.27	13.6748
838.3	7.8	415	5	258	4	26	1	1116.1	12.5	485.4	5.85	412	17	205.5	2.7	869	16	571	7	1180	14
838.8	9.1	415.25	4.83	258.2	5.6	26	1	1117.3	5.15	485.5	5.65	412.2	8.4	205.5	5.79	869	12	571	6	1180	12
840	8	415.72	10.33	259	3	26	1	1120	12	485.52	6.26	412.2	12.3	205.6	2.2	869	14	571.3	12.5	1180	82
840.25	10.45	416	5	259	3	26	2	1121.7	4.3	485.59	6.06	412.3	8.7	206	4	869	15	571.3	13.7	1180	21
841	9.5	416.7	5.62	259	3	26	0.8	1122	13	485.6	6.15	412.7	8	207	18	869	8	571.32	11.23	1181	58
841.2	8.2	417	4	259	3	26	1.2	1122	20	485.6	6.2	412.7	8.5	207.1	3.8	869	5	571.37	11.52	1181	21
842.8	8.5	418	5	259	3	26.2	0.9	1124.5	12.5	485.7	5.6	412.92	7.16	207.1	1.95	869	7	571.44	9.04	1181	57
844	68	418	6	259	3	26.5	1.3	1125	12	485.8	5.85	413	5	207.5	1.65	869	13	572.2	15.9	1181.5	13.9
844	36	419	12	259	5	26.5	0.3	1125	31	486	5	413	10.6	207.7	21.4	870	13	572.2	8.2	1182	85
844.6	5.9	419	5	259	3.9	26.53	1.36	1127.9	17.4	486	7	413	12.5	208	6.5	871	6	572.7	5.7	1182	32
844.7	9	420	7	259	7	26.6	0.8	1128	14.1	486	7.5	413.1	15.7	208	0	871	4	573	6	1182.89	44.0046
844.8	11.9	420	5	259	3	26.7	2.1	1129.5	17.7	486	5.8	413.37	5.49	208.2	1.9	871	6	573	7	1182.89	42.3885
844.9	6.3	420	4	259	5	26.8	0.4	1130	25	486	172	413.7	11.9	208.4	12.6	871	14	573.5	8	1183	18
846	7.5	420.2	4.1	259	6	26.8	1	1130.4	5.2	486.2	11.7	413.7	14.4	208.8	2.7	871	11	574.2	10.4	1183	52
846	13	421	5	259	2	26.9	7.6	1131	24	486.46	6.91	413.88	15.53	208.8	2.55	872	13	574.29	17.77	1184	59
846.6	6.1	421	4	259	3	27	1	1131	11	486.96	7.75	413.9	20.3	209	9.9	872	12	574.3	13.9	1184	96
846.7	20.1	421	5	259.1	0.95	27	1	1132.1	6.4	487	80	414	4	209.3	2	873	16	574.5	10.9	1185	21
847	29	421.11	4.31	259.4	1.95	27	2	1133	23	487.4	16.3	414	3	209.3	8.3	873	19	574.8	18.7	1185.7	16.3
847	6	421.34	4.36	259.5	7.1	27	1	1133	10	487.41	7.03	414	3	209.46	8	874	13	575	3	1186	10
847.4	6.2	421.8	4.1	259.7	22.3	27	1	1133.5	7.35	487.67	6.09	414	3	209.46	16.08	874	10	575	18	1186	19
848	15	422	5	259.7	3.75	27	1	1134	14	487.95	6.18	414	4	209.6	1.01	874	11	575.6	8.8	1186	41
848.8	9.4	422	5	260	3	27	1	1135	13	488	30	414	18	210	7	874	5	575.9	12.4	1187	49
849.9	6.2	422	13	260	3	27	1	1136.3	7.2	488	3.8	414.04	7.22	210	15	874	14	576	9.4	1187	74
850.1	11.9	423	5	260	3	27	1	1139	28	488	13	414.1	15.7	210	6	874	17	576	3	1189	99
850.6	15	423	5	260	3	27	1	1139.3	16.1	488	4	414.2	21.2	210.1	24.5	874	11	577	10	1189.2	17.2
851.4	6.2	423	5	260	3	27	1	1140.7	7.35	488	2	414.4	14	210.2	1.95	874	16	577	3	1191	23
852	11.4	423	5	260	3	27	1	1141	12	488	1	414.5	19.2	210.8	5.3	875	5	577.24	23.98	1192	22
853	28	423.18	4.9	260	4	27	2	1146	15	488	24	414.6	11.8	211	0	875	15	577.7	10.3	1192	56
854	8	424	5	260	4	27	2	1146	11	488	114	414.8	8.5	211	16	875	13	577.85	14.21	1192.77	33.7618
854	12	424	6	260	4	27	1	1146.8	5.25	488	2.5	415	5	211	14	875	10	578.08	13.15	1193	18
854	9	424.68	5.83	260	6	27	2	1147.8	27.7	488.8	11.65	415	5	211.7	3.1	876	18	578.36	6.23	1193	21
854	8	424.96	6.7	260	6	27	2	1148.1	7.95	488.9	9.25	415	11.5	212	2.7	876	14	578.9	33.4	1195	24
854.99	14.54	425	10	260	4	27	1	1150	17	489	7.5	415	20	212	0	876	11	579	6	1197	16.6
855	9.3	426	5	260	3	27	2	1151	10	489	4	415.4	16.9	212	0	877	28	579	20.4	1197	81
857.2	8.9	427	4	260.5	5.8	27	2	1151.2	24	489	4	415.7	12.9	212	0	877	5	579	6	1197	90
857.3	11.5	427.1	4.1	261	3	27.3	1.6	1152.2	5.3	489	7.5	415.7	13.1	212	0	877	7	579	6	1198	6
857.75	18.49	427.6	7.9	261	3	27.4	0.9	1152.5	6.95	489	6	415.8	10.8	212.2	9.2	877	13	579	11.1	1198	101
857.8	10.8	428	5	261	3	27.5	1.5	1152.8	12.4	489.06	7.34	416	5	212.2	9.5	877	18	579.1	10.6	1200.78	15.7503
858	14	428	5	261	4	27.8	4.1	1153.1	10.6	489.3	11.75	416	3	212.4	3	878	15	579.2	18.9	1201	42
858.1	7.3	428	4	261	4	27.8	1	1153.4	7.05	489.4	5.75	416	5	212.5	1.8	878	33	580	8	1201	21
860.2	7.6	428.21	3.18	261	7	28	0.5	1153.8	11.75	489.6	5.4	416	7.4	213	3	878	16	580.2	9.1	1202	29
861.2	9.6	428.6	4.2	261	7.9	28	0.5	1154	12	489.7	5.6	416	6	213	16	878	19	580.2	15.6	1203	88
861.9	7.5	429	6	261	6	28	1	1154	20	489.93	7.69	416.01	4.85	213.1	2.8	879	6	580.28	15.71	1203.26	30.2993
862.2	13.5	429	5	261	3	28	1	1154.5	8.75	490	5	416.5	13.5	213.4	8.4	880	29	580.4	19.5	1204	12
862.5	7.3	429	5	261	4	28	1	1155.9	5.3	490	7	416.59	10.31	214	7	880	5	580.6	14.5	1205	13
862.8	11.1	429.6	8.53	261	6	28	2	1157.2	12.7	490	6.5	417	4	214	0	880	12	581	29	1205	14
863	7.1	430	16	261	3	28	2	1158	41	490	5	417	4	214	1	880	18	581	7	1205	15
864	16	430	6	261.2	5.2	28	2	1161	20	490	4	417	3	214	7	880	15	581	3	1205	38
865	12.2	430.6	4.2	262	3	28	2	1161.1	6.15	490	3	417	7	214.1	3.25	881	14	581	6	1205	123
865.2	7.7	430.99	7.53	262	3	28	2	1162	11	490	8	417.1	14.1	214.5	6.25	881	11	581.1	5.9	1206	34
866	9.2	431	5	262	5	28	2	1163	22	490.2	5.65	417.2	12.5	214.5	2.6	881	11	581.3	18.9	1207	56
866.5	10.9	431	4	262	3	28	2	1164	15	491	0.28	417.2	13.7	215	0	881	5	581.72	9.44	1207	18
867	15	432	8	262	3	28	2	1164	10	491	9	417.3	12.3	215	0	882	27	581.9	12.9	1207	64
867.3	9.4	432	5	262	3	28	1	1164	23	491	27	417.4	15.8	215	4.8	882	23	581.9	8.2	1207.79	10.8546
867.4	8.7	432	6	262	4	28	1	1164.7	39.5	491	9.5	417.6	13.6	215	15	882	16	582	6	1208	137
868	14	432.12	4.23	262	4	28	2	1165	15.7	491	7	417.7	21.6	215.6	2.35	883	15	582	10	1209	100
868	13.8	432.3	8.4	262	3	28	1	1165.1	12.45	491	9	417.8	14.7	215.6	6.12	885	14	582	11	1209	8
868.3	8	433	6	262	4	28	2	1165.2	15.45	491	11.5	418	4	215.8	2.2	885	5	582	10	1209	28
870.2	13.9	433	7	262	5.5	28.1	1.1	1167.6	12.4	491.2	11.8	418	4	216	2	885	12	582.1	5.8	1210	39
870.3	12.7	433	9	262	4	28.2	0.25	1168	18.05	491.3	11.3	418	4	216.1	0.9	886	17	582.3	8.1	1211	14
871.4	8.6	433.5	4.71	262	3	28.2	1	1168	26	492	6	418	24	216.2	9.7	886	5	582.73	11.39	1211	12
872	30	434	5	262	7	28.3	1.8	1174	12	492	1	418.2	6.7	216.4	1.45	887	10	582.8	5.7	1212	44
873	96	434	5	262	6	28.3	0.8	1174.8	17.1	492	44	418.9	12.5	216.7	17.2	887	4	583	6	1213	18
873.8	6.8	434	5	262	3	28.3	1.5	1175.1	5.35	492	3	419	4	217	5.5	887	5	583	6	1215	77
874.3	11.7	435	5	262	6	28.4	0.7	1175.1	22.3	492.1	11.8	419	5	217	0	887	15	583	15	1216	66
874.7	7.9	435.95	5.91	263	3	28.4	0.8	1175.2	14.1	492.1	5.05	419	10	217	4	888	5	583.3	14.4	1217	102
876	9	436	6	263	3	28.41	4.61	1176	17.4	492.7	3.1	419.3	15.3	217	15	888	28	583.3	16	1217	23
876	17	437	9	263	2	28.6	1.6	1177.4	37.1	493	5.5	419.3	13.9	217	2	888	28	583.6	17	1217	23
876.4	13.1	437	5	263	3	28.6	1.3	1179	24	493	0	419.7	38.2	217.2	13.1	888	4	583.9	12.3	1218	61
877.7	6.7	437.61	4.8	263	3	28.6	1.6	1180	24	493	7	419.8	9.1	217.3	6.02	888	21	584	5	1218	58
877.87	14.49	437.7	7.4	263	4	28.62	0.74	1180.9	7.3	493	2	419.9	17	217.9	2.1	888.9	6.1	584	12.1	1219	108
877.9	8.6	438	6	263	2	28.9	0.5	1181	24	493	8	419.9	12.2	218	3	889	7	584.1	7.5	1220	85
877.9	11	438	5	263	3	29	0.5	1181	13	493	5	420	6	218	25	889	18	584.26	13.1	1220	55
878	8.8	438.11	4.3	263	3	29	1	1182.5	5.4	493	7	420	4	218	5	889	18	584.4	13	1221	48
878.2	9.1	438.35	4.3	263	3	29	2	1185	13	493	33	420	13	218	10	889	11	584.5	24.9	1222	88
879.3	13.3	438.42	9.75	263	3	29	1	1185	13	493	7	420	23	218	2	889	9	584.7	9.4	1223	21
880	18	438.9	5.3	263	2	29	1	1185.1	16.65	493	4	420.2	12.8	218.3	2.7	889	7	584.8	16.9	1223	85
880	13	439	6	263	2	29	1	1186.2	7.5	493	4.5	421	12	218.7	2.25	890	10	585	8	1224	47
880.3	12.4	439	14	263.6	8.1	29	1	1191.1	11.7	493	7	421	12	218.8	8.2	890	12	585	17	1224	7
881.1	11.6	439.5	3.69	264	3	29	2	1191.6	8.6	494	10	421	2.5	219	2	890	12	585	8	1225	94
883.3	9.3	440	6	264	2	29	2	1192	11	494	7	421	5	219	2.2	891	10	585.1	11.7	1227	49
883.5	8.4	440	6	264	3	29	1	1194	13.15	494	15	421	20	219	1.85	891	10	585.3	9.2	1227	8
883.5	0.9	440.6	4.3	264	4	29	1	1195	11	494	6	421.3	20.9	219	2	892	19	585.36	11.46	1227	35
884.1	11.6	440.8	5.8	264	3	29	2	1195	66	494	4	421.5	22.8	219	2	892	38	585.43	9.74	1228	66
884.2	9.3	441	6	264	5	29	3	1196	27.9	494.1	5.85	421.9	2.6	219	4	892	11	586	12	1228	115
884.4	13.2	441	25.5	264	4	29	1	1197	21	494.4	5.9	422	2.5	219	2	892	11	586.32	11.52	1228	23
886	9	442	6	264	4	29	1	1197	32	494.8	6.7	422	7	219.1	3.4	892	10	586.73	5.69	1229	8
886.5	13.3	442.39	6.42	264	9	29	2	1198	16	495	14.5	422.4	0	219.1	14.4	893	11	587	8	1229	48
887.6	8.2	442.8	4.8	264	3.6	29	1	1203	12	495	14.5	422.6	8.4	219.4	0.8	893	24	587.61	10.25	1229	9
887.98	9.78	443	28	264	2	29	1	1204	14	495	8	422.6	13.3	219.4	1.8	893	15	587.7	10.1	1230	17
888.3	16.7	443.37	8.65	265	4	29	1	1206.2	5.7	495	4	422.7	24.2	219.7	1.55	894	14	587.8	8.5	1230	13
889	59	443.9	9.6	265	3	29	1	1206.3	10.35	495	7.5	422.7	27.3	220	4	894.03	0	587.85	11.88	1231	83
890.8	8.4	444	5	265	3	29	0.8	1215.5	9.3	495	7	422.9	13.8	220	17	895	8	588	3	1231	27
891	12	444	5	265	3	29.1	0.8	1217	11	495	44	423	6	220	10	895	25	588	8	1231	32
892	11	444.4	24.2	265	3	29.4	1.6	1217	14	495	38	423	4	221	9	895	10	588.5	8.9	1231	42
892.7	13.8	445	6	265	3	29.5	0.6	1218	30	495.23	8.23	423	4	222	2	895	11	588.7	16.2	1231	41
893	22	445	6	265	2	29.61	1.56	1218.3	24.5	495.8	2.25	423	3	222	16	895	14	588.8	15.8	1233	51
893	28	445	12	265	6	29.84	0.37	1218.5	7.25	495.9	6.15	423.1	14.3	222	8	896	5	589	6	1234	61
893.5	13	445.01	3.7	265	10	30	0.5	1218.9	16.45	496	10	423.8	15.9	222.1	10.3	896	6	589	9.8	1234	18
893.9	13.5	445.08	5.36	265	9	30	1	1219	33	496	8	424	3	222.3	6.09	896	12	589	10	1234.37	12.6611
896.4	8.6	446	5	265	1	30	2	1219	13	496.2	5.75	424	2.5	222.8	3.25	896	37	589	6.8	1235.1	18
897	9	446.83	6.34	265	2	30	2	1230	18	497	7.5	424	5	223	0	897	8	589.04	17.59	1236	15
898	13	447.94	4.1	265	4	30	1	1232	14	497	5	424	20	223	2	897	13	589.1	15.8	1237	26
899.6	18.9	448.6	7.85	265	3	30	2	1233	25	497	4	424.65	10.75	223	1.5	898	2	589.5	11.1	1238	22
901	14	449	7	265	2	30	2	1233	17	497	5	425	3	223	6	898	14	589.5	15.8	1238	62
901.1	7.5	449	25.5	265.2	2.1	30	1	1235.4	6.2	497	5.5	425	3	223	6	898	9	589.6	6.7	1238	26
903	10	449.51	10.3	265.4	3.7	30	1	1235.5	8.95	497.3	5.7	425	5	223.2	2.9	899	15	589.8	15	1239	75
903	11	449.63	6.16	265.8	7.2	30	2	1235.5	7.55	498	13	425	6	223.6	3.05	900	14	589.9	10.6	1242	109
904	17	450	6	266	3	30	1	1236	14	498	5	425	13	224	4	900	7	590	6	1243	50
905	7	450	7	266	3	30	1	1238	25	498	5	425	6	224	2	901	9	590	5	1243.3	14.9
906.46	15.16	450	5	266	3	30	1	1244	15	498	2.5	425.4	15.9	224	3	903	15	590	6	1244	25
906.8	13.6	450	5	266	3	30	1	1245	25	498	4	425.8	15.6	225	5	903	11	590.95	13.34	1244	7
907	17	450.1	6.3	266	3	30	2	1246	7.9	498.59	7.52	425.8	16.1	225	0	903	15	591	7	1245	126
909	8	451	7	266	5	30	1	1246.8	19.4	499	16	426	2.5	225	2	906	27	591	6.5	1245	42
910	10	451	9	266	3	30	1.6	1250	25	499	31	426	24	225	8	906	27	591.2	12.4	1246.34	11.0076
910	9	451	4	266	4	30.2	0.9	1255	14	499	8.5	427	5	225	15	906	12	591.9	10.8	1247	92
911	15	451.79	10.02	266	3	30.3	6	1255	52	499	11	427	14	225.7	1.3	906	5	591.9	14	1247	59
912	7	452	10	266	5	30.3	1.1	1256	25	499	5	427	5	226	10	906	13	592	3	1247.5	15.2
912.4	13	452.7	6.5	266.4	4.9	30.7	1.1	1261	15.55	499	13	427	3	226	15	908	26	592	6	1249	17
916	10	453	30	266.6	5.9	30.7	1.6	1262.5	7.1	499	5	427	24.4	226.17	2	908	24	592	8	1251	14
918.69	17.82	453	6	266.7	4.15	30.9	2.5	1264	12.9	499	13	427	24	226.17	4.23	908	13	592.5	8.9	1251	70
920	28	453.7	9.7	266.8	4.2	30.9	2.53	1266.9	35.55	499	81	427	7	226.4	10	908	17	593	8	1251.77	63.4161
920	12	453.71	5.83	267	5	30.91	0.49	1267.1	28.85	499.5	0.7	427.7	17.8	226.6	2.8	909	25	593	3	1253	12
920	17	454	6	267	5	31	0	1269	13	499.84	6.65	427.8	19.9	226.9	6.71	909	6	593	7	1253	17
921.5	13.1	454	5	267	3	31	1	1270.2	33.4	500	5	428	5	228	6	910	16	593.3	6.2	1253	24
922	18	454.06	20.85	267	3	31	1	1270.6	22.5	500	8.5	428.3	0	229	0	910	13	593.4	12.8	1255	16
923	14	454.28	10.94	267	6	31	1	1272.1	7.5	500	6.5	428.6	2.1	229	5.3	910	27	593.5	16.9	1255	58
923	43	454.71	5.49	267	3	31	1	1275	23	500	5	428.8	11.6	229	1	911	21	593.7	6.7	1255	41
925	32	455	6	267	9	31	1	1281.1	3.9	500	5	428.8	22.2	229	18	912	8	593.8	18.2	1256.4	17.6
925.4	16.2	455	6	267	6	31	1	1282	12	500	15	429	5	230	0	913	18	593.9	8.6	1257	14
926	15.3	455	7	267.1	5.2	31	1	1283	22	500	8	429	4	230	5	914	19	594	10	1258	142
927.84	7.99	455	5	267.6	6.8	31	2	1285.5	15.8	500.3	1.55	429	7	230	1.5	914	10	594.2	6.1	1258	9
928	83	455.12	5.4	267.7	11.3	31	1	1288.5	19.6	500.4	2.2	429.6	15.6	230	3	916	26	595	6	1258.41	11.022
930	124	455.39	8.55	268	3	31	2	1291.6	16.5	501	6	430.3	16.8	230.3	3	917	31	595	8	1259	112
932	74	455.66	3.8	268	3	31	3	1294	120	501	6	430.4	48.9	230.4	1.25	917	13	595.1	8.4	1259	110
932.8	8.6	455.75	10.25	268	3	31	2	1300	99	501	5	430.8	8.1	230.8	8.1	918	15	595.1	8.3	1260	18
933.85	10.81	456	24	268	3	31	1	1301	10	501	5	431	3	231	2	918	29	596	16.7	1260	39
934.81	10.37	456	6	268	3	31	2	1304	11	501	26	431.86	13.3	231	3	918	17	596	10	1260	74
936	20	456	40	268	6	31	1	1305	9	501	11	432	5	231	1.5	918	24	596.2	12.4	1261	101
937.45	13.31	456	12	268	9	31	3	1307	26	501	8	432	3	231	12	919	18	596.4	9.7	1261	61
937.82	12.55	456	5	268.6	4.1	31	1	1308	28	501	8	432	16.8	231	16	922	22	596.9	5.9	1262	13
937.92	11.65	456	7	269	3	31	2	1315	24	501	6	432.1	12.7	231	3	922	9.5	597	10	1262	23
938	10	456.01	6.42	269	4	31	1	1315.5	11.85	501	10	432.1	23.2	231.3	2.75	922	21	597	5	1262.5	15.2
938	138	456.4	7.41	269	4	31	2	1317	14	501	13	432.5	17.5	231.3	9.7	923	8	597.3	15.5	1263	17
939	19	456.41	4.36	269	5	31	1	1319.5	13.2	501.4	1.9	432.5	19.2	231.6	13.8	923	15	597.5	11.6	1264	59
939	16	457	6	269	4	31	1	1321	14	501.4	6.8	432.88	12.05	232	5.5	924	7	597.5	11.5	1264	14
939.21	17.56	457	27	269	4	31	2	1321	10.7	501.97	6.51	433	4	232	0	924	11	597.9	5.7	1265	15
940	12	457.8	17.2	269	3	31	1.8	1323	27	502	36	433	4	232	2	925	7	597.9	10.2	1265	40
940.8	14.82	458	5.5	269	3	31.1	1.7	1323.3	12.45	502	5	433	30	232	0	926	6	598	3	1266	69
941	8	458	5.5	269	3	31.2	1.5	1326	15	502	6	433.39	17.56	232	0	926	5.3	598	5.7	1266.05	10.8171
941	21	458	12	269	3	31.3	2.1	1327.3	6	502	5	433.9	12.7	232	2	926	9	598.7	11.2	1266.47	11.0728
941.1	12.23	458	7	269	6	31.3	1.4	1328.6	11.05	502	6.4	434	9	232.3	7	928	22	598.8	7.6	1268	77
943.42	15.33	458.17	6.17	269	4	31.3	1.4	1329	9	502	4	434	6	232.5	6	929	22	599	17	1268	14
944	49	458.58	5.91	269	4	31.4	0.57	1330	27	502.1	7	434	7	232.7	19.6	929	18	599	7	1269	7
946	12	459	6	269	3	31.6	0.8	1332.9	10.8	503	4.5	434.51	5.67	232.8	18.4	930	17	599	7	1269	19
946	43	459	6	269.4	11	31.6	1.4	1335	27	503	10	435	7	233	0.5	932	29	599	10.4	1269	21
947	26	459	7	270	3	31.7	0.7	1336	27	503	10	435	5	233	3	933	41	599	7	1270	18
947	39	459.2	4.1	270	3	31.7	2.3	1338	9.4	503	1	435	6	233	2	934	9	599	10	1270	18
948	10	459.3	10.6	270	3	31.8	0.27	1339	16	503	10	435	3	233	1.5	936	6	599	10	1270	15
949	112	459.6	4.8	270	3	31.8	1.6	1339	36	503	6	435	3	233	8	938	17	599.2	13.2	1271	70
949.38	21.68	460	7	270	3	31.9	0.8	1339	36	503.5	5.4	435.1	0	233.5	2.3	938	15	599.3	5.7	1272	49
950	37	460	30	270	6	31.9	1.2	1339.8	11.25	503.5	2.5	435.59	6.27	233.7	4.4	938	1.5	599.9	11.8	1272	50
951	8	460	6	270	4	32	1	1344	30	504	36	436	6	233.8	2.1	941	19.5	600	4	1272	34
953	10	460	5.5	270.1	4.1	32	1	1344.9	13.3	504	9	436	5	234	2	941	22	600	6	1273	49
953.77	19.6	460	5	271	3	32	2	1346.3	6.9	504	5	436.6	15.6	234	2	943	31	600	6	1273	36
955.5	12.28	460.2	5.7	271	3	32	1	1347	27	504	6	437	5	234	5	945	19.5	600	22	1275	15
955.71	17.41	460.27	6.89	271	3	32	1	1347.3	36.7	504	10	437	4	234	3	945.5	10.5	600.1	15.1	1275	60
956	17	460.3	10.1	271	4	32	0.6	1349.1	16.2	504	15	437.2	18.2	235	6	945.5	8.8	600.5	40.5	1275	119
956	9	460.7	9.6	271	5	32	1.9	1354	45	504	7	437.5	3.1	235	3.5	945.5	5.6	600.7	9.6	1276	23
957.03	14.32	461	6	271	2	32	1	1357.8	6.1	504	6	437.58	6.91	235	2	946	14	601.2	7.3	1276	26
958.3	8.4	461	6	271.4	6.6	32	3	1359	27	505	6	438	5	235	2	948	21	601.7	24.1	1277	77
958.7	14.6	461	6	271.6	5.2	32	9	1361	12	505	9	438	5	235.8	3.5	948	9	601.74	10.02	1277	70
960	15	461	6	272	3	32.1	2	1361.1	6.15	505	5	438.6	6.4	236	3	948.9	7.1	602	5	1277	29
960.56	14.6	461	8	272	3	32.2	1.1	1362	16	505	6	438.88	9.51	236	1	952	17	602	8	1278	115
961	22	461	5	272	3	32.2	1.3	1364	27	505	15	439	13	236	3	952.6	10.4	602.06	8.73	1278	55
961.18	15.87	461.3	10.5	272	4	32.2	0.5	1365	27	505.26	8.54	439	13	236	3.5	953	28	602.2	7.2	1280	70
962	10	462	6	272	4	32.3	1.2	1366.4	15.1	505.3	5.85	439	12.4	236	15	953	14	602.6	17	1281	73
962	11	462	6	272	3	32.3	1.2	1366.8	12.3	505.89	7.22	439.65	10.51	236.7	2.15	953.9	4.6	602.8	6.3	1281	15
963	18	462	7	272	5	32.3	0.9	1368.6	8.75	506	8	439.93	17.39	237	1.95	954	25	603	13	1282	113
963	10	462	8	272	6	32.4	1.5	1370	27	506	8.5	440	18.2	237	3	955	17	603	8	1282	16
963	53	462	5	272	6	32.4	0.9	1372	18	506	5.5	440	7	237	6	956	6	603	6	1283	15
964	9	462	5	272.2	4.2	32.4	1.5	1373.6	6.4	506	18	441	5	237	6	958.7	6.6	603.3	15.7	1283.02	39.7189
964.92	15.38	462	11	272.6	8.2	32.4	0.8	1373.6	6.2	506	2	441.13	5.24	237	18.1	964	44	603.7	6.3	1284	16
965	16	462.19	7.23	273	3	32.5	0.8	1377	28	506	6	441.2	19.9	237.2	3.65	964	44	604	10	1284	20
965	34	462.2	4.5	273	3	32.5	1.8	1377.1	22.45	506.62	6.05	442	7	237.5	3.55	964	12	604	6	1284	5
965.99	11.96	462.4	6	273	5	32.6	1.4	1383	28	506.8	3.85	442	24.1	237.6	1.4	965	15	604.1	10.6	1285	15
967	11	462.48	4.6	273	3	32.6	1.1	1384	35	507	5.5	442.2	19.1	237.7	6.58	966	9.5	604.5	14.6	1285.4	15.1
967	6	462.5	3.9	273	3	32.8	1.4	1385	10.55	507	7	442.2	0	237.7	4.1	966.3	8.6	604.5	5.8	1286	16.5
968.48	9.98	462.8	5.2	273	4	32.9	1	1387	25	507	7	442.9	8.5	237.7	11	967	22	604.8	10.8	1286	14
969	11	463	31	273	3	32.9	0.9	1389	28	507	5.5	443	7	237.8	3.9	968.2	3.3	605	6	1286	16
970	16	463	5	273	4	33	0.9	1390.8	18.6	507	4	443	7	237.9	1	971	11	605	8	1287	19
970	176	463	12	273.4	5.2	33	1	1393	8.4	508	4	443	7	238	0.5	971	20	605.23	8.52	1287	55
970.08	13.99	463.4	4.9	273.6	5.7	33	2	1393.3	11.1	508	5	443.3	25.2	238	3	972	31	605.5	2.9	1288	86
971	10	464	6	274	4	33	1	1394	15	508.3	8.15	444	7	238.1	2.2	974	15	605.6	7.2	1288	14
971.39	12.37	464	6	274	3	33	2	1394.3	9.25	508.51	8.29	444	5	238.4	1.5	974	39	605.63	10.11	1289	15
971.91	20.75	464	7	274	3	33	3	1394.5	10.65	508.9	3.2	444.3	16.6	238.54	2	975.8	4.1	605.7	11.5	1289	85
973	8	464	6	274	7	33	2	1394.9	20.2	509.3	5.7	445	149	238.9	11.4	977	11	606	6	1289	16
973.15	15.73	464.41	4.5	274	4	33	3	1395.7	6.1	510	24	445	6.4	239	1	977	19	606	18.7	1289	16
974	12	464.48	3.82	274	4	33	1	1400	6.3	510	8	445	7	239	0	977	23	606	30.1	1290	14
975	18	464.84	7.82	274	2	33	2	1401	15	510	8	445.62	5.37	239	0	978	15.5	606.1	18.3	1290	13
977	13	465	6	274.1	4.8	33	1	1401	28	510	13	445.7	11.74	239	4	978	16	606.2	15.4	1290	20
977	11	465	6	274.1	2.1	33	2	1403.4	19.8	510	9	445.7	9.1	239	1.5	979.1	4.3	606.7	14.2	1291	32
977	12	465	7	274.6	4.2	33	0.44	1403.8	13.35	510	4	446	3	239	1.5	980	18.5	607.1	6.9	1291	16
977	42	465.4	5.8	275	5	33	1	1404.1	8.3	511	6.5	446	14	239	1.5	981	29	607.3	16.9	1291	34
977	16	465.56	15.42	275	3	33.1	2.2	1409.5	8.75	511	2	446.57	10.01	239	6	981	18	607.5	12.6	1292	16
977.22	12.68	465.57	6.59	275.5	7.5	33.1	0.9	1411	13	512	6	447	5	239.1	2.1	981.6	8.5	607.5	6.6	1293	71
977.44	19.3	465.6	4.1	275.5	4.9	33.2	0.9	1411	32	512	16	448	2.5	239.1	2.2	982	20.5	608	23	1293	21
978	9	465.8	9	275.8	6.1	33.2	1.2	1413	28	512	8	448	11	239.2	5.1	982.3	9.7	608	6	1293.43	14.0923
978.6	10.9	466	6	276	6	33.29	1.41	1413	28	512	16	448	5	239.7	1.1	983	6	608	6	1294.19	10.8605
979.3	40.6	466	6	276	10	33.4	1.1	1415	16	512	9	448	7	239.9	1.9	983.8	3.4	608.2	19	1295	16
979.65	12.67	466	20	276	9	33.4	1.3	1416	14	512	8	448.5	20.7	240	6	986	7	608.5	6.7	1295	14
980	8	466	8	276	3	33.4	0.8	1416	19	512.2	0.7	448.59	7.13	240	10	986	18.5	608.6	16.2	1295	75
981	9	466.44	20.12	276	4	33.4	1.4	1417	14	512.5	7.15	448.86	7.38	240.3	27.3	986	9	608.68	6.41	1296	21
981	15	467	5	276.5	5.6	33.4	0.63	1419	19	512.5	4.85	449	13	240.5	22.5	988	22	609	25	1296	17.2
981	12	467	7	276.6	1.6	33.6	0.6	1420	10	513	6	449	7	240.6	1.95	989	28	609	12	1296	48
981.14	17.21	467.2	5.8	277	4	33.64	0.8	1421	17	513.8	12.25	449	5	241	0	989	16	609	11	1296	15
981.57	16.06	467.4	3.2	277	3	33.7	1.45	1424	57	514	15	449	9	241	2.5	990	30	609.2	7.1	1296	20
981.9	17.09	467.41	8.04	277	4	33.9	0.9	1425	132	514	11	449	6	241	2	990	21	609.3	11.8	1296.2	13.1
982	12	467.5	6.2	277	7	33.9	0.6	1427	12	514	6	449.1	18.9	241	1.5	990	9	609.5	17.7	1296.22	83.1911
982	14	467.8	4.5	277	5	33.9	0.9	1428	17	514	8.5	449.7	5.32	241	18.5	990	14	609.99	4.69	1297	102
982	10	468	4	277.3	3.8	34	8.4	1430.9	6.6	514	8	449.7	16.6	241	1.5	990	36	610	6	1297	15
982	8	468.5	4.9	278	2	34	0.5	1443.1	11.1	514	9	449.97	6.12	241	1	991	21	610	6	1297	17
983	14	468.58	7.84	278	3	34	2	1448	26	514	5	450.4	19.2	241.2	2.9	991	9	610	7	1297	17
983	41	468.7	3.3	278	3	34	2	1450.6	18.6	514.3	7.4	450.7	0	241.2	4.5	992	16	610	9	1297	9
983	16	468.7	15	278	3	34	2	1451.8	40.8	515	5	451	19.4	241.2	15.1	992	13	610.04	13.69	1298	13
984	21	468.82	4.9	278	2.65	34	2	1452.3	10.7	515	13	451	5	241.5	2.85	993	13	610.1	18.3	1298	16
984	41	468.94	15.84	279	3	34.1	1.9	1458	17	515.48	8.48	451	5	241.5	2.65	993	7	610.5	32.3	1298	42
984	155	468.94	3.19	279	5	34.1	1.4	1472.1	11.2	516	5.5	451	4	242	2	994	22	610.5	7.3	1299	14
984.82	17.97	469	6	279	4	34.2	1.5	1473	17	516	2	451	7	242	0	995	19	611	7	1300	14
985	17	469	6	279	3	34.3	1.1	1474.6	8.1	516	5	451.1	1.9	242	28	995	21	611.2	17.3	1300	16
986	9	469	6	279	6	34.31	2.1	1481	116	516	100	451.6	18	242	2	995.5	8.6	611.3	3.2	1300	66
986	15	469	14	279	6	34.35	2.51	1492.6	12.85	516	6	452	7	242	1	996	7	611.4	6.2	1301	16
986.5	17.55	469	24	279.7	9.8	34.4	0.8	1500.8	9.65	516	6.8	452.7	1.9	242	6	996	13	611.7	16.6	1301	14
986.91	17.18	469	7	279.9	3.15	34.4	1.1	1501	33	516.33	6.7	452.93	6.2	242	7	996	17	612	8	1301	35
987	13	469	6	280	9.7	34.62	0.56	1508	38	517	8.5	453	7	242	8	996.9	6.3	612.8	19.9	1303	16
987	15	469.5	5.7	280	7	34.68	1.27	1508.2	19	517	8.5	453	7	242	9	997	75	613	6	1303	15
987	10	470	6	280	7	34.7	0.9	1509.8	19.2	517	14	453.19	5.97	242	10	998	16	613	7	1304	15
988	11	470	6	280	3	34.76	0.9	1510.5	30.4	517	7	453.2	8.4	242	1.5	998	19	613	13	1304	19
989	10	470	7	281	3	34.8	1.5	1511	22	517.7	5.25	453.3	7.5	242	17	998	10	613	10	1304.77	11.8614
989	13	470.3	8.59	281	3	34.9	0.35	1512	35	518	4	453.4	0	242.8	13.9	998.5	8.6	614	6	1305	20
989	14	470.42	8.88	281	3	34.9	1.2	1512	39	518	10	453.7	30.4	243	2.5	1000	12	614.3	15.7	1306	42
989.5	5.9	470.5	1.7	281	3	35	2.5	1514	13	518	11	454	3	243	2.4	1000.1	6.1	614.5	11.8	1306	44
989.96	14.64	470.5	3.7	281.3	5.1	35	1.3	1514.3	9.4	518	6	454	15	243	1	1001	16	614.9	15.6	1306	49
989.98	24.34	470.9	16.1	281.9	7.6	35	0.9	1515.3	23.9	518	8	455	3	243	1.5	1002	28	615	7	1306	15
990	29	470.9	22.7	282	4	35	1.9	1520	21	518.45	7.92	455	5	243.6	2.45	1002.5	5.7	616	8	1306	15
990.41	11.62	471	6	282	3	35	1	1521.1	20.1	519	8	455	6	244	0	1003	25	616	6	1306	17
990.89	19.37	471	6	282	4	35.1	0.9	1523.5	28.2	519.34	9.19	455	7	244	0	1003	18	616.1	24.7	1306.01	12.1293
991	10	471	7	282	3	35.15	0.82	1524	19	520	17	455	5	244	1	1004	14	617	6	1307	15
991	11	471	5	282.2	9.5	35.2	3.4	1524.5	32.6	520	19	455.7	12.8	244	7	1004	7	617	20	1307	15
991	41	471	9	282.3	2.7	35.4	1.4	1526.1	8.9	520	6	455.8	23.4	244	4	1004	9	617.2	19.3	1308	90
991	25	471.13	7.21	282.4	2.2	35.46	0.61	1527	10	520	7	456	13	244.7	4.3	1004.8	5.6	617.6	16	1308	16
992	11	471.2	8.19	282.8	2.5	35.6	1.2	1527	49	521	8	456	4	244.8	2.6	1005	19.5	618	4	1308	10
992	13	472	33	283	4	35.6	0.6	1527.1	25.3	521	4	456	7	244.8	2.8	1005	6.3	618	7	1308.7	15.4
992.69	13.32	472	5	283	3	35.8	1.1	1528	10	521	4	456	3.5	244.8	1.5	1005.9	6.3	619	7	1309	15
993	16	472	8	284	3	35.8	1	1529.8	30.9	521	9	456	9	245	2.5	1006	18	619	11	1310	22
994.9	16.22	472.1	9.5	284	10	35.8	1	1531	20	522	15	456	7	245	0	1007.9	7.8	619	6	1311	15
995	9	472.97	4.75	284	8	35.9	2.2	1535	18	522	3.5	456	5	245	4	1008	20	619	8	1311	16
995	8	473	30	285	4	35.9	0.7	1535.7	43.2	522	0	456	23	245	0	1009	41	619.3	7.5	1311	15
995	36	473	17	285	4	36	0.5	1536.4	14.1	522	7	456.25	18.73	245	7	1009	28	619.3	13.2	1311	15
995.1	21.38	473	10	285	6	36	1.5	1538	82	522	48	456.72	6.75	245.5	2.35	1010	18	619.6	23.9	1311.94	13.5609
995.6	11.7	473.1	3.35	285	4	36	1	1539	20	523	9.5	456.8	23.6	245.5	2.3	1010.2	6.9	620	5	1312	43
996	9	473.4	5.2	285.3	5.5	36	1.5	1543.2	19	523	6	457	5	245.7	0.75	1011	16	620	3	1312	19
996	15	473.4	14.3	286	7	36	1	1544	13	523	16	457	7	245.7	2.7	1011	11	621	7	1312	9
996	18	473.6	3.3	286.2	8.7	36	0.9	1545.3	17.75	523	7	457.05	7.16	246	0	1011.9	4.3	621	11	1312	21
996.51	16.19	473.6	9.3	286.6	6.5	36	1.96	1548	188	523	3.1	457.52	13.31	246	3.5	1012	26	621	11	1312.37	33.4391
998	10	473.63	7.56	287	3	36.01	0.51	1548	10	523.3	2.77	457.9	10.3	246	1.5	1012	8.5	622	8	1314	9
999	9	473.8	3.7	287	4	36.1	0.8	1549.3	27.1	523.43	7.47	458	7	246	1.5	1012	31	622	11	1315	11.0259
999.61	18.7	474.2	4.4	287	7	36.3	1	1552	10	523.94	11.39	458	15	246	1.5	1012	24	622	3.5	1315	47
1000	14	474.48	5.63	287	1.85	36.43	2.21	1554	23	524	5	458	7	246	4	1012	14	623.5	9.7	1316	12.9
1000	11	475	6.5	287.7	4.7	36.5	2	1555	15	524	7	458	5	246	9	1013.8	14.9	624	5	1317	210
1000	8	475	32	288	3	36.5	1.3	1555	26.7	524	8.5	458	7	246	1.5	1014	21	624	3	1317	38
1000.4	13.12	475	12	288	6	36.6	3.8	1557	20	524	6	458.93	10.63	246.1	1.5	1014	21	624	3.5	1318.09	11.7165
1000.7	9.1	475	6	288	7	36.61	1.83	1557	23	524	5	459	6	246.2	3.4	1014.8	8	624.6	26.98	1319	16
1001	10	475	10	289	3	36.7	0.9	1559	20	524	8.8	459.06	19.02	246.5	13.3	1014.9	6.4	624.7	12	1319	25
1001	15	475	15	289	4	36.7	1.5	1559	20	524.6	12.8	459.7	22.1	246.7	11.1	1015	20	624.8	21	1319	35
1001	65	475.39	10.34	289	4	37	1	1559.9	14.75	525	5	459.86	6.17	247	0	1015	17	626	25	1319.05	11.1146
1003	15.47	475.5	8.8	289.3	10.5	37	1	1560	12	525	3.5	459.9	25.56	247	3.5	1015	2	626	11	1320	17
1003	8	475.7	7.7	289.3	4	37	1	1560.2	22.6	525	10	460	5	247	0	1016	30	626	7	1320	12
1003	6.5	475.8	3.2	289.5	4.4	37	1.6	1562	11	525	4	460	3	247	7	1018.8	7.8	626	101	1320	15
1004	15	476	3.5	290	4	37	1	1562	15	525	8	460.2	24	247	2.8	1019	20	626	11	1320	15
1004	10	476	6	290	6	37	0.81	1563	20	525	8	461	8	247	2.5	1020	15	626.2	8.3	1320.55	11.5104
1004	10	476	7	291	7	37.2	1.6	1564	20	525	9	461	3	247	5	1020.3	6.8	626.3	15.8	1320.66	11.6909
1004	6.5	476	11	292.4	8.2	37.2	1.8	1565	10	525.6	2.85	461	13	247	2	1021	19	626.5	14	1321	12
1004.1	12.9	476.39	8.4	292.8	4.65	37.3	1	1566	20	525.8	3.9	461	6	247.2	3.25	1021	15	626.6	17.5	1321	99
1004.6	14.66	476.52	11.44	292.9	7	37.3	0.6	1566.8	10.4	526	2.5	461.06	6.6	247.7	2.45	1021	19	627	4.3	1321	57
1005	6.5	476.69	13.96	293	3	37.4	2.9	1567	10	526	8.5	461.1	7.19	247.9	3.55	1021	7.4	627	2	1321	16
1005	5.5	476.9	12.3	293	3	37.5	1	1567	13	526	4	461.89	12.64	248	7	1022	24	627	3	1322	58
1005	10	476.99	4.75	293.2	3	37.6	1.1	1567.4	14.9	526.13	10.34	462	5	248	2	1023	25	628	7	1322	85
1006	11	477	14	295	3	37.72	0.67	1569	0	527	13	462	6	248	4.5	1024	8	628	7	1322	48
1006	13	477	6.5	295	6	37.74	1.33	1570	18	527	4	462	5	248	2.5	1024	28	628	17.3	1322	56
1006	9	477	6	296	4	37.78	1.34	1574	19	527	9	462	4	248	8	1024	20	628.3	8.2	1325	85
1006.5	19.3	477	5	297.3	4.9	37.88	1.46	1574.3	60.7	527	14	462	7	248	4	1024.6	10.6	629	7	1326	92
1007	12	477.4	2.3	297.7	2.15	37.91	0.93	1574.4	19.64	527	8	462	5	248	5	1024.9	3.7	629.2	18.6	1326	26
1007	15.42	477.4	14.4	298	3	38	1	1574.5	17.5	527	4.5	462.28	5.64	248.2	3.1	1025.4	7.3	629.2	3.5	1326	94
1007	10	477.5	4.3	298	3	38	2	1575	9	527	1	462.6	4.6	248.2	2.9	1026.5	6.9	629.2	11.3	1326	10
1007	11	477.5	9.6	298	4	38	1	1576	11	527	17	462.7	2.5	248.2	2.15	1027.6	6.8	629.4	6.7	1329	49
1007	16	477.7	7.7	298.1	4.25	38	1	1576	11	527	9	462.9	6.56	248.4	12.7	1029	20	629.9	9.5	1330	57
1007.32	11.59	477.96	7.26	298.9	5.7	38	0.6	1576	10	527	10.5	462.96	7.52	249	0	1029.2	9.1	630	11	1330	96
1007.56	19.01	478	31	299	4	38.01	1.63	1576	18	527	7	463	4	249	0	1030	17.5	631.21	9.26	1331	41
1007.6	11.04	478	6.5	299.3	11.2	38.1	3.7	1577	35	527	4.15	463	6	249	5	1030.7	6.6	631.3	9.7	1331	22
1008	11	478	6	299.8	3	38.1	0.6	1578.3	17.1	527.1	5.8	463	14.4	249	6	1031	38	631.6	12.6	1331	9
1008	15.16	478	6	301	7	38.2	0.8	1578.6	37.6	527.7	2.6	463	14	249	1.5	1031	22	631.8	25.7	1332	96
1008	32	478.2	9.4	301.8	3.1	38.2	1.5	1578.9	26.9	527.8	16.5	463	5	249	1	1034	23	632	6	1332	158
1008	39	478.6	4.6	302.4	4.7	38.5	1.2	1579	9	528	5	463	24	249	17	1036	8	632	6	1332	71
1009	6	478.8	9.47	303	4	38.7	0.8	1579	20	528	10	463.3	2.6	249	3	1036	15	632	6	1332.05	11.8781
1009.1	10.97	479	9	303	8	38.71	1.02	1579.3	14.6	528	16	463.4	15.5	250	4	1037.1	9	632	7	1332.95	17.2027
1009.9	16.38	479	6	303.7	2.2	38.8	1.2	1580	9	528	8.5	463.54	13.52	250	0	1041	43	632.25	12.11	1333	78
1010	8	479	6	303.8	8.7	39	1	1581	17	528.02	8.64	463.9	7.18	250	2	1043	29	633.52	8.77	1333	8
1010	25	479	8	303.9	5.8	39.2	2.6	1581.3	24.25	528.22	8.41	464	8	250	9	1045	16	633.6	23.5	1333	119
1011	12	479	8	304	3	39.5	2.5	1581.9	44.45	528.8	3.25	464.1	7	250	17	1045	5.6	633.6	6.9	1333.07	33.4412
1011	11	479.1	4.6	304	7	39.59	1.91	1582	29	528.9	9.2	464.2	10.4	250	3	1048	19	633.7	9.3	1333.5	16.1
1011	9.5	479.2	5.7	304	4	39.6	1	1582.3	57.1	529	10	464.32	6.33	250.2	19.9	1048.6	9.3	634	11	1335.39	11.195
1011	31	479.9	7.7	304	3	39.6	0.7	1583	29	529	8.5	464.37	6.53	250.4	3.95	1049	28	634	7	1337	9
1011	44	480	6	304.3	2.85	39.79	5.19	1583.3	31.3	529	14	464.7	9.23	250.4	2.55	1049	18	634	6	1339	8
1012	5	480	7	304.9	9.9	40	0.6	1584	15	529	13	465	6	251	6	1049	11	634	6	1339	18
1012	12	480	14	305	3	40	0.6	1584	29	529.08	6.77	465	6	251	2	1057	9.7	634	8	1341	138
1012	5.5	480.3	9	305	4	40	2	1584.1	81.2	529.6	12.1	465	20	251	5	1057.1	7	634	6	1342	6
1012	11	480.56	8.6	305	2	40.3	0.7	1585	37	529.8	2.25	465.7	3.7	251	3	1060.7	7.2	634.9	6.1	1342	78
1012	8	480.75	6.14	305.6	7.1	40.3	0.8	1585	10	530	8.5	465.75	18.59	251.3	3.5	1061	22	635	7	1342	18
1012.7	15.74	481	5	306	3	40.3	1.1	1586.3	128.6	530	5	466	5	251.3	4.3	1062	20	635	3	1343	75
1013	10	481	5	306	7	40.4	1.1	1586.6	23.6	530	5	466	7	251.3	2.95	1063	12	635	5	1344	72
1013	6	481	15	306	3	40.6	1.6	1586.9	25.85	530	9	466	4	251.5	3.4	1070	19	635.3	9.2	1344	48
1013	11	481	11	306.9	7.5	40.65	1.22	1587.3	10.45	530	6	466.11	13.32	251.9	2.35	1071	28	635.8	4.4	1344	77
1013	25	481.02	7.59	307	6	40.8	0.6	1587.5	36.5	530.6	8.1	466.25	6.19	252	2	1071	18	635.9	20.3	1344	49
1013	10	481.5	4.6	307	7	40.9	2	1588.2	108.1	531	15	466.28	6.59	252	3.5	1074	42	636	8	1345	63
1013	76	481.8	6.6	307.6	5.7	40.9	0.8	1589	19	531	76	466.48	6.86	252	2	1076	28	637	11	1345	20
1015	15	482	6	308	4	41	1	1590.5	9.7	531	5	466.6	25.3	252	6	1080	12	637	13.4	1347	30
1015	1	482	6	308	3	41	1	1590.9	19.6	531	8	467	6	252	7	1081	6	637.1	26.4	1348	14
1015.55	11.67	482	6	308	6	41	1	1591	21	531	10.5	467.17	7.44	252.1	0.6	1081	17	637.2	6.7	1348	70
1015.8	10.61	482.29	5.92	308	4	41	2	1591.2	39.3	531	7	468	3	252.3	2.25	1082	11	637.3	7.2	1349	59
1016	12	482.3	10.55	308	8.7	41	1	1592.3	31.2	531	113	468	5	252.7	1.85	1093	19	637.8	11.9	1350	19
1016	12	482.5	3.3	309.3	3.1	41	1.1	1593.2	3	531	11	468	3	252.8	3.5	1095.1	9	638	4	1350	74
1016	21	482.82	7.41	310.9	14.4	41.1	1.23	1593.2	18.4	531.34	11.23	468	4	253	0	1097	20	638	9	1352	63
1016.3	12.5	483.13	8.96	311	3	41.2	0.6	1593.7	22.9	531.4	6.9	468	15	253	6.2	1097.4	6.9	638.2	21.7	1353	55
1016.83	22.43	483.83	11.02	311	5	41.3	1.1	1594	10	532	3.5	468	7	253	3.5	1098.4	10.5	639	4	1354	18
1017	12	483.9	5.9	311	3	41.5	1.1	1594	5	532	3.5	468	6	253	2	1099	71.5	639	15	1355	39
1017	11	484	11	312	4	41.54	1.18	1595	10	532	9.5	468.5	17.1	253	2.5	1100.7	5.4	639.7	34.2	1355	5
1017	9	484	7	312	3	41.7	0.7	1595.7	26	532	6.5	468.6	80.9	253	3	1101	37.5	640	6	1355	116
1017.9	18.35	484	5	312	3	41.8	1.9	1596	4	532	9.5	468.66	7.21	253	1	1101	19	640	23	1356	13
1017.92	12.19	484	6	313	8	41.9	1.4	1598	76	532	8	469	5	253	1.5	1109.2	6.9	640	7	1358	111
1018	10	484	8	315	6	42	1.7	1599	36	532	8.5	469	6	253	9	1112.5	10.5	640.2	17.5	1358	71
1018	8	484.1	5.2	316	6	42	0.8	1599	81	532	51	469	7	253.1	3.4	1122.4	11.5	640.3	13	1359	15
1019	22	484.1	16.7	316	5	42	1	1599.7	38.1	532	9	469	6	253.7	2.65	1124	24	641	6	1360	27
1019	8	485	7	317	5	42	1	1600	16	532	8	469	6	253.7	14.6	1125.2	7	641.9	7.5	1360	5
1019	11	485.17	5.41	317	6	42	2	1601	9	533	10	469	18	253.9	6.3	1133	8	642	6	1361	111
1019	6.5	485.44	8.17	318	4	42.1	0.8	1602	13	533	4	469	6	254	4.6	1133	14	642.2	0	1362	22
1020	10	486	7	318	3	42.12	1.02	1602	20	533	5	469	5	254	0	1135	31	643	6	1363	48
1020	11	486	8	319	6	42.19	1.28	1603	9	533	6	469.3	6.7	254	0	1135.7	14.5	644	8	1363	7
1020.6	15.44	486	5	319	4	42.2	1.3	1603.5	9.35	533	8	469.7	10.9	254	0	1136	5.2	644	8	1364	134
1020.8	18.93	486.3	6.45	319	4	42.3	0.6	1605	11	533.2	2.55	469.76	7.99	254	4	1139	150	644	8	1365	17
1021.3	12.65	486.3	3.9	319	4	42.3	0.4	1606	11.8	533.9	5.9	469.8	6.1	254	1	1139.4	6.3	644	4	1365.88	13.989
1022	11	486.6	9.51	320	4	42.4	1.7	1607	10	534	7	470	3.5	254	5	1144	9	645	11	1365.95	51.7046
1022	8	486.8	6.6	320	5	42.4	2.4	1607.5	31.3	534	13	470	27	254	4	1145.7	5.9	645	16	1367	38
1022	10	486.87	13.85	321	4	42.5	2.2	1608	9	534	5.5	470	7	254	5	1147	6	645.81	199.45	1367	21
1022.3	15.46	487	5	321	3	42.5	1.6	1608	9	534	4.5	470	5	254	6	1149	31	646	19	1368	44
1023	20	487.07	0	322	3	42.51	0.77	1608.2	22.4	534	188	470.2	18.4	254	3	1150	11	646	7	1368	90
1023	19	487.92	5.19	322	4	42.6	2.2	1610	36	534.4	2.55	470.25	9.14	254	3	1166.4	3	647	9	1368	100
1023	12	488	5	322	3	42.6	0.6	1610.1	18.4	534.8	2.76	470.3	12.3	254	3	1166.7	5.6	647	9	1368	21
1023.8	16.37	488	17	322	6	42.6	1.2	1610.4	47.7	534.9	12.5	471	15.9	254.7	3.1	1166.7	9.1	647	11	1369	66
1024	15.26	488	5	323	3	42.75	1.46	1613	19	535	0	471.7	2.5	254.7	7.07	1168.5	9.6	647.3	8.1	1370	117
1024	13	489	8	323	4	42.8	1	1613.5	9.3	535	4.5	471.7	4.8	254.9	2.2	1169.2	10.4	647.6	8.8	1370	38
1024	7.5	489.24	7.63	323	4	42.8	1.1	1614	37	535	5.9	471.9	6.9	255	0	1178	22	649	8	1370	15
1024.58	21.68	489.3	6	323	3	42.9	0.6	1614.8	19.16	535	4	472	5	255	5.5	1185.4	3.6	649.3	10.1	1370	54
1024.8	22.28	489.64	13.88	323	4	42.9	1.2	1615	13	535	8	472	13.8	255	0	1188.7	8.9	649.3	10.5	1371.67	15.5629
1025	24	489.73	7.18	323	4	42.99	1.74	1615.4	5.6	535	5.6	472	106	255	1	1190.2	8.7	650	7	1372	48
1025	11	490	14	323	5.5	43	1	1615.7	29.4	535	8.5	472	6	255	4	1197.5	1.6	650	3.5	1372.2	15.8369
1025	7.5	490	5	324	6	43	3	1616	36	535	9.5	473	6	255	10	1212	7.6	650.4	22.1	1373	63
1025	6	490	6	324	4	43.07	0.8	1617	16	535	7	473	9	255	11	1215	18	651	4	1373	54
1025	6.5	490.26	15.67	324	3	43.1	2	1617	74	535	16	473	11	255.8	12.3	1229	11	651	3.5	1373.97	14.7228
1025	54	490.3	7.4	324.7	3.5	43.2	2.5	1618	10	535	2	473	3	256	1	1364.7	0	651	6	1374.61	13.0242
1026	10	490.35	5.5	325	3	43.3	0.8	1618	11	535.14	8.92	473	4	256	4	1516	1.5	651	3.5	1375	70
1026	11	490.4	5.4	325	4	43.3	1.5	1618	13	535.3	9.3	473	7	256	0.5	1584	19.5	652	6	1376	48
1026	10	490.52	9.24	325	2	43.5	2.2	1618	18	535.4	2.55	473	7	256	1	1590	17	652.1	4.6	1376	35
1026	12	490.6	4.7	325.2	7.5	43.6	2.36	1619	39	535.98	7.35	473	5.5	256	2	1615	28	652.31	8.24	1376	120
1026	25	490.8	9.5	325.6	2.65	43.8	3.1	1619	8	536	3	473	11	256	6	1638.1	18.6	653	7	1377	66
1026	7	490.98	7.71	325.7	3.35	43.8	1.5	1620.7	30.2	536	11	473	5	256	21	1690	22	654	7	1377.3	16.1
1026	8	491	10	325.9	3.55	43.8	2.2	1620.8	37.05	536	24	473.1	17.1	256	3	1712	20	655.78	10.25	1378	65
1026.1	13.19	491	6	326	6	43.9	0.8	1621	7	536	5	473.12	9.36	256	3	1732	43	656	8	1378	109
1026.1	17.17	491.5	7.3	326	4	43.9	0.9	1621	16	536	6.4	473.4	24.3	256	3	1750	17.5	657	4	1378	21
1027	14	491.87	6.75	327	6	44	1.8	1621.3	67.6	536	10	473.7	8	256.3	5.7	1750	35	659.9	9.9	1380	66
1027	9	492	9	327	4	44	1	1622	12	536	24	473.89	7.34	256.5	10.2	1770	56	660.08	2121.73	1380	17
1027	8	492	14	327	3	44	1	1622.1	48.5	536	11	474	8	257	5.2	1789	8	661.1	0	1380	123
1027	10	492	18	329	4	44	3	1622.6	18.9	536.3	2.55	474	74	257	1.5	1789	16	662.2	0	1380	102
1028	31	492	21	329.2	10.2	44	1.1	1623	8	536.4	12.3	474	5	257	8	1804	45.5	662.6	7.6	1380	21
1029	11	492.2	4.35	330	7.7	44	1.1	1623.2	31.35	536.7	6.4	474	5	257	5	1816	16	663	6	1381	28
1029	9	492.2	4.8	330	7.4	44	1	1623.8	10.9	536.7	6.4	474	7	257	3	1818	28	663	11	1381	95
1029	5	492.3	4.95	331	3	44	1	1624	4	537	2	474.1	13.8	257.1	4.05	1821	49	664	8	1381	71
1029.9	13.29	492.4	8.88	331	4	44	2	1626	17	537	5	474.4	14.9	257.4	2.5	1829	16	664	8	1381	27
1030	9	493	31	331	5	44	3	1626.2	122.7	537	9.5	475	5	257.6	7.85	1829	21	664.8	11	1382	134
1030	10	493	3.5	331	7	44	1	1626.6	27.7	537	9.5	475	8	258	10	1832	70	665	8	1382	89
1030	8	493	13.7	331.5	6	44.02	1.47	1627	10	537	8.5	475	4	258	9	1836	12	667	14	1383	84
1030	13	493	6	331.6	5.5	44.1	2.3	1627	9	537	8.5	475	7	258	3	1837	14	668	13	1383	35
1030	12	493	5	332	4	44.1	1.7	1627	7	537	11	475.1	4	258	3	1839	15.5	668	8	1383.04	10.0611
1030	36	493.03	7.57	332	4	44.1	1.5	1627	17	537	8	475.1	20	258.4	4.2	1839	31	668	6	1384	47
1030.37	21.49	493.07	5.21	332	4	44.1	2.6	1628	22.3	537	8.5	475.3	25.4	258.7	4.85	1842	132	669	3.5	1384	100
1031	12	493.12	9.18	332	5	44.2	1.4	1628	10	537	5.5	475.4	9.2	258.7	2.5	1842	12	669	3.5	1384	18
1031	60	493.42	15.31	332	4	44.2	0.91	1628.8	26	537	4	476	3	259	6.5	1843	38	671.2	16	1385	76
1032	6	493.5	3.9	332	2	44.3	0.7	1629	19	537	4	476	7	259	5	1845	25.5	672	11	1385	19
1032	19	494	13	333	4	44.3	1.5	1629	11	537	2.5	476	9	259	6	1847	21	672.3	5.6	1386	87
1032	42	494	6	333.6	5.6	44.3	1.2	1630	8	537	4.5	476	5	259.8	2.9	1861	521	672.36	11	1387	41
1032	23	494	5	335	7	44.4	1.3	1631	10	537.77	8.91	476	5	259.9	3.4	1861	26	674.7	8.6	1387.2	49.4104
1032.24	12.56	494	31	335.1	7.2	44.5	1.2	1631	10	538	8.5	476.3	8.1	260	3	1867	34	675	11	1389	149
1032.6	8.4	494.7	12.4	335.3	6.1	44.5	1.4	1633	8	538	8.5	476.8	4.4	260	3.5	1867	29	675	5	1389.5	16.4
1032.8	14.31	494.88	10.61	336	3	44.5	1.3	1634	20	538	6.5	477	5	260	12	1869	12	675	10	1390	5
1032.9	11.8	495	11.8	336	5	44.51	0.78	1636	10	538	6	477	5	260	4	1876	47	675	12	1390	111
1033	13	495	26	336	4	44.6	1.7	1636.2	36.2	538	8	477	7	260	3	1884	91	675.5	11.8	1390	23
1033	9	495	10	336	2	44.76	1.06	1637	37	538	9.5	477	29	260.9	11.4	1890	21	676	8	1393	85
1033	9	495	11	337	4	44.8	1.4	1639	12	538	10	477.4	17.3	261	0.5	1891	11	676	8	1393	39
1034	9	495.51	8.72	337	3	44.8	1.6	1639	10	538	9	477.45	2.78	261	0	1892	29	677	9	1394	19
1034	7.5	495.8	3.7	337	7	44.8	1.6	1639	6	538	5	478	14	261	5.8	1902	17	677	8	1394	25
1035	11	496	6	337.9	3	44.86	0.88	1640	9	538	122	478	14	261	4.5	1904	19	677.32	59.75	1394	12
1035	13	496	6	338	4	44.9	3.6	1641.3	37.7	538	5	478	4	261	2	1915	1.05	679	4	1394.95	11.6618
1035.6	12.34	496	6	338	4	44.9	1.2	1641.9	41.8	538	2.5	478	6	261	2.5	1920	20	679	9	1395	38
1036	10	496.33	6.71	338	4	44.9	0.9	1642	44	538	2	478	11	261	5	1920	35.5	680	9	1395.94	28.5351
1036	11	496.93	6.25	338	6	44.9	1.3	1642	12	538	1	478	7	261	7.9	1923	39	680.3	18.6	1396	14
1036.1	10.46	497	3.2	338	4	44.94	1.24	1643	16	538	6	478	6	261.6	0.75	1925	43	681	7	1396	58
1037	5.5	497	5	339	5	45	0.7	1645.2	10.4	538.4	1.9	478.14	13.98	261.7	2.9	1930	6	681	12	1396	100
1037	6	497	6	339	3	45	2	1646	8	538.9	3.15	478.2	10.1	261.8	2.6	1930	6	682.7	10.9	1396	73
1037	82	497.02	5.64	339	6	45	2	1646.5	39.7	539	8.5	478.6	11.6	262	2.5	1930	12	683.4	9.3	1397	80
1037.4	11.95	497.13	0	339	4	45	2	1648	8	539	8.5	478.9	16.4	262	2	1930	12	683.87	11.23	1398	23
1037.8	9.8	497.39	10.41	339	7	45	1	1649	18	539	8.5	479	5	262	5	1943	52	684	7	1399	91
1038	22	497.7	8.6	339	4	45	1	1650	34	539	3	479	7	262	3	1943	82	684	9	1400	115
1038	12	498	4	339.9	2.2	45	1	1650	13	539	5.5	479	14	262.3	3.95	1945	30	684	4	1400	77
1038	9	498	9	340	6	45	1.4	1650	7	539	7	479	7	262.5	3	1946	130	686.1	21.1	1401	118
1038	8	498	8	340	7	45	0.94	1650.3	12.2	539.2	1.15	479.1	14.9	262.5	11.2	1952	19	686.3	10.7	1403	46
1038	12	498	15	341	5	45.04	1.6	1651	34	539.9	3.25	480	4	262.8	9.9	1956	28.5	688	7	1403	28
1038	29	498.3	10.9	341	4	45.1	1.7	1653.4	20	539.9	2.6	480	6	263	5	1972	17	689	9	1404	46
1039	16.82	498.77	7.98	341	4	45.2	0.9	1655.7	13.05	540	4	480	8	263	1	1977	22	690.8	8.1	1404	12
1039	35	498.8	24.85	341	4	45.3	1	1655.9	21.9	540	13	480.3	14.1	263	1	2029	8	691	22	1405	61
1040	18	499	6	341	3	45.3	1.9	1656	6	540	10	480.8	2.8	263	7	2033	0	691.1	17.2	1405	60
1040	8	499	7	341.5	3.8	45.3	0.9	1656.4	17.6	540	3	481	6	264	5	2039	63	691.6	43.5	1406	82
1040	9	499	9	342	4	45.3	1.1	1658	9	540	3	481	3	264	6	2050.3	17.7	692	7	1407	21
1040	9	499.65	12.56	342	7	45.32	1.02	1658	7	540	6	481	6	264.1	5.65	2073	20	692.1	36.1	1407	59
1040	12	500	13	342	8	45.35	1.22	1658	6	540	10	481	25.1	264.9	9.5	2074	9	693	9	1408	58
1040	7	500	11	342	8	45.4	1.5	1661	11	540	9.5	481	26	265	2	2094	1	693.8	26.1	1408	42
1040	30	500	3	342.1	5.8	45.4	0.7	1661	20	540	10	481	7	265	3	2101	26	695	12	1409	47
1040.1	11.08	500	102	343	3	45.4	1.5	1663.5	54.6	540	4	481	10	265	5	2209	74	695.6	9.3	1410	144
1040.1	15.98	500	3	343	4	45.4	1	1666	80	540	5	481	7	265.7	3.25	2257	25	696	3.5	1410.99	12.1458
1041	20	500	11	344	4	45.4	2.4	1666	0	540	0	481	4	266	0	2268	13.5	696	12	1411	121
1041	10	500	9	344	4	45.4	1.4	1669	29	540	149	481	6	266	5.5	2355	13	696.2	14.6	1411.1	17.5
1041.16	11.1	500	5	344	7	45.4	1.1	1669.5	28.6	540	2	481.06	6.53	266	4	2375	18	696.82	9.59	1413	39
1041.9	17.56	500.2	4.8	344	5	45.4	0.81	1670	19	540	1	481.1	0	266	5.5	2381	40	697	8	1413	5
1042	71	500.33	5.6	344	8	45.49	0.71	1670	8	540	2.5	481.14	5.56	266	4.5	2430	0	698	3.5	1413	50
1042	24	500.4	4.8	344	7	45.5	1.1	1672	7	540	1.5	481.22	13.33	266	2.5	2431	11	699	12	1413.7	11.7709
1043	6.5	500.5	17.95	344.3	2	45.5	1.1	1673	58	540	2.5	481.36	3.17	266	2	2446	24.5	700	12	1414	23
1043	14	501	6	345	6	45.5	1.2	1674	0	540	9	481.91	7.57	266.3	5.9	2452.4	0	700	7	1414	73
1043	41	501	6	345	4	45.5	1.1	1678	10	540.2	3.9	482	5	266.9	3.45	2455	9.5	700	12	1415	71
1044	9	501	6	345	4	45.5	1.5	1680	9	540.29	8.46	482	4	267	0	2458	14	700.8	57.9	1415.66	12.5723
1044	23	501	7	345	3	45.5	1.1	1681	13	540.4	4.1	482	7	267	2	2463	8	701	15	1416	71
1045	20	501.9	5.05	346	4	45.59	1.08	1681.7	56.5	540.4	7.85	482	7	267	3	2465	10.5	704	9	1418	48
1045	7	502	6.5	346.1	5.1	45.6	1.5	1683	7	541	5	482.02	16.47	267	2	2467	0	705	7	1421	97
1046	13	502	3	346.8	5	45.6	3	1687	29	541	10	482.3	3.6	267	8	2468	12.5	705.2	19.2	1421	9
1046	34	502	9	347	4	45.6	1.8	1688	13	541	8.5	482.5	2.1	267	2.5	2472	12.5	707.6	13.1	1424	15
1046	6	502	6	347	5	45.6	0.8	1688.2	28.5	541	8.5	482.6	30.7	267	1.5	2477	18.5	708	7	1424.61	12.501
1046.3	11.63	502.03	11.12	347	8	45.64	0.77	1689.9	30	541	10	482.6	8.2	267	4.5	2483	10.5	708	23	1426	55
1046.39	21.04	502.3	2.4	347	3	45.64	0.84	1690	16	541	2.5	482.7	23.2	267	3	2485	20	708	7	1427	64
1047	26	502.3	6.08	347	2	45.7	0.9	1691	10	541	4	482.81	8.73	267	3.5	2491	27	708.17	9.53	1427.95	11.8956
1047	25	502.4	13.6	347.6	7.4	45.7	0.9	1693.1	29.7	541	10	482.91	7.48	267	1.5	2492	7	711	11	1429	77
1047	9	502.79	5.11	348	7	45.7	2.1	1696.6	9.95	541	14	483	7	267	1.5	2502	11	711	8	1429	62
1047.58	10.65	503	10	348.5	11	45.71	0.67	1697	12	541	2.5	483	8	267	5	2513	8.5	712.3	7.1	1429	30
1047.92	13.02	503	3	348.7	3.25	45.8	2.2	1697	12	541	2	483	6	267	9	2526	7	713	8	1430	110
1048	13	503	7	349	7.9	45.8	1.9	1697.6	27.1	541	4	483.18	6.17	267	4	2526	20	713	9	1430.89	16.531
1048.4	19.51	503	6	349	5.6	45.8	1.5	1698	19	541	36	484	3	267.5	37.6	2534	21	713	8	1431	101
1049	36	503	7	349	8	45.9	1.9	1699	29	541	86	484	5	268	0	2546	23	715	9	1431	41
1049	12	503	7	349	2.85	45.9	1	1699.6	10.85	541	4.25	484	2.2	268	2	2563.8	1.65	715	16.9	1432.84	11.9496
1049	19	503.28	10.34	349.6	9.7	46	4	1701	13	541.28	10.27	484	8	268	3.5	2572	42	716	9	1434.73	13.8895
1050	10.93	503.3	3.6	350	5	46	1	1701	4	541.5	1.25	484.9	4.9	268	4.5	2586	5	717	7	1436	14
1051.24	19.24	504	6	350	4	46	2	1701	0	542	1	484.9	4.7	268	1.5	2596	10	718	4	1437	36
1051.8	11.48	504	7	350	4	46	1.6	1701.2	10	542	3	484.97	5.9	268	5	2608	37	719	7	1437	14
1053	11	504	16	350	5	46	0.9	1702.4	20	542	5.5	485	7	268	7	2609	41	720.9	19.4	1439	62
1053	22	504	5	350	4	46	1.3	1702.8	9.1	542	4	485	29	268	8	2612	22	721	7	1440	42
1053	8	504	7	350	4	46	2	1703	13	542	9	485.2	12.6	268.2	2.95	2616	10	721	8	1440.59	15.6943
1053.5	10.78	504.12	5.98	350	2	46	1	1703.3	19.9	542	7.4	485.3	18	268.3	4.85	2625	7	723	9	1441	158
1053.95	13.93	504.7	3.4	350.5	1.7	46	2	1704	35	542	6.5	485.39	11.67	268.6	7.6	2627	40	723.2	17.9	1441	21
1054	11	504.8	3.75	351	4	46	4	1704	23.85	542	7.5	485.5	2.1	269	5.9	2633	9.5	725.2	11.9	1441.6	18.2
1054	9	504.82	7.14	351	4	46.01	1.35	1704.7	15.3	542	5	485.7	12.8	269	3	2633	19	726	24	1442	43
1055.45	12.04	504.84	0	351	10	46.02	1.67	1706	20	542	3	485.9	10.3	269	0	2645	23	727	9	1443.15	12.023
1056	11	505	34	352	6	46.1	1.2	1706	30	542.33	8.8	486	6	269	2.6	2649	10	728	7	1446	65
1056	39	505	7	352	8	46.1	0.7	1706	14	542.62	10.15	486	17	269	4.5	2660	26	728	13	1447	65
1056.87	23.91	505	15	353	5	46.1	1	1706	12	542.9	27.9	486	8	269	3.5	2660	52	730	8	1447	41
1057	10	505	7	353	13	46.1	1.2	1706.6	12.6	543	6	486.03	16.63	269	1	2662	12	733	7	1447.84	12.0263
1057	10	505	5	353	12	46.1	0.56	1707	14	543	6	486.52	5.98	269	1	2690	8	735	4.5	1448	55
1058	23	505	5	353	4	46.18	2.29	1708.4	18.4	543	7	486.8	13.7	269	19	2690	16	735	9	1449	88
1058	47	505	10	353.3	3.8	46.2	1.1	1709	24	543	8.5	486.9	24.4	269.1	4.4	2707	8	735	9	1450	35
1058	25	505.3	13.4	354	4	46.2	1.5	1709	24.1	543	2.5	487	4	270	0	2761	11.5	735.9	18.6	1452	47
1058.44	26.65	505.41	5.43	354	8	46.2	1.2	1711.1	13.35	543	5	487	6	270	6	2849	10	736	9	1453	73
1059	12	506	13	354	4	46.2	1.9	1712	13	543	6.5	487	5	270	3.5	3008.1	0	737	9	1455	15
1059	11	506	13.5	355	3	46.21	0.76	1712.5	52.3	543	17	487	5	270	0	3069	32	739	4	1455.08	11.5869
1059	9	506	16	355	2	46.22	1.06	1713.7	27.25	543	6	487.1	9.2	270	0.5	3195	19	741	8	1456	68
1060	15	506	11	355	2	46.28	1.21	1714	25	543	11	487.6	0	270	2			741	10	1456	44
1060	16	506	11	356	4	46.3	1.3	1714	13	543	3	487.7	6.44	270	1			741.09	76.75	1456	18
1060	55	506.08	5.68	356	3	46.3	2	1715	20	543	1.5	487.9	13.1	270	8			741.16	16.41	1456	23
1060.8	12.54	506.1	6	356	3	46.3	4.5	1715.4	31.65	543	9	488	6	270	7			742	10	1456.15	10.6753
1060.9	10.48	506.4	4.6	356.4	7.2	46.4	1.4	1716.6	13.9	543	4	488	15	270	7			743	4	1456.73	17.1212
1061	10	506.5	16.5	357	8	46.5	1.9	1717.2	13.5	543.53	9.64	488	7	270.4	20.1			744	75	1457	19
1062	11	506.5	2.65	357	8	46.5	0.9	1717.6	10.95	543.9	9.8	488	8	270.5	4.2			744	7	1459	9
1062.7	10.46	506.7	4.65	357	4	46.5	1.5	1718	32	544	7	488	7	271	2			745	10	1459.68	13.1396
1063	17.49	507	5	357	5	46.5	1.5	1720	21	544	10	488.3	3.5	271	5.5			746	9	1460	16
1063	21	507	15	357	2	46.5	1.4	1721.6	9.2	544	2.5	488.5	14.9	271	1			747	27.5	1460	104
1063	11	507	4.9	358	8	46.5	1	1722	6	544	9.5	488.52	2.83	271	2			747	4.5	1460	14
1063	12	507	6	358	3	46.5	1.2	1722	5	544	2.5	488.7	2.8	271.1	5.5			747	3.5	1463	110
1064	13	507	8	359	4	46.5	1.1	1723	13	544	6.5	488.89	7.24	271.2	2.4			749.3	10	1463	61
1064	12	507.18	7.01	359	5	46.5	1.9	1723.8	22.05	544	11	488.9	23.4	271.5	15.9			751	13	1464	20
1064	25	507.2	3.1	359	8	46.51	1.17	1724	10	544	9	489	5	271.5	3.25			751.8	8.9	1465	63
1065	11	507.38	14.58	359	8	46.52	0.94	1724	19	544	6.5	489	6	272	2			751.8	15	1467	14
1065	34	507.5	3.4	359	4	46.52	0.89	1724	13	544	5.5	489	7	272	6			753	10	1467.09	12.1736
1065	33	507.63	9.5	360	4	46.53	2.09	1724.8	24.15	544	10	489.14	11.58	272	1			753	9	1468	23
1065.4	13.5	507.7	17.15	360	3	46.55	1.28	1727	6	544	1.5	489.7	11.9	272	0			753	8	1468.71	16.8622
1066	11	507.8	4.9	360	12	46.59	1.14	1727	0	544	3	490	4	272	3			753	4	1470	39
1067	11	508	35	360	8	46.6	0.9	1729	4	544	8	490	15	272	4			755	9	1470.8	14.3
1067	23	508	2.75	360	5	46.6	1.9	1729.7	45.2	545	12	490	20	273	0			755	10	1471	6
1067	16	508	3	360	3	46.6	1.7	1730	35	545	6	490	9	273	3.5			760	7	1472	95
1067.7	15.08	508	6	361	4	46.65	1.42	1730.3	19.1	545	8	490	8	273.1	12.4			760	13	1472	60
1068	8	508	6	361	4	46.68	0.7	1731.5	69.7	545	12.5	490	27	273.4	1.7			763	9	1473	21
1068	27	508	7	361	5	46.7	0.8	1732	23	545	3.5	490	11	273.6	3.85			763	10	1474	70
1068.51	14.59	508	7	361	4	46.7	0.9	1732	18	545	5	490	6	274	0			764	10	1474	92
1069	23	508.2	1.8	362	7	46.7	0.9	1732.5	103.9	545	5	490	18	274	4.5			764	11	1474	70
1069	10	508.5	3.4	362	8	46.7	1.4	1732.9	18.65	545	5.5	490.4	9.6	274	3.5			765	7	1476	46
1069	10	508.85	8.32	362	2	46.8	1.2	1732.9	25.7	545	7.5	490.6	0	274	5			765.6	0	1476	73
1069.34	21.01	508.92	8.47	363	4	46.8	1.6	1734.7	23.65	545	9	491	12	274.1	3.85			766	9	1476.97	12.795
1070	28	509	8	363	4	46.8	0.7	1735	0	545	9	491	4	274.1	6.6			766	7	1477	58
1070.03	25.62	509	8	364	7	46.8	1	1735	0	545	0.5	491	5	274.3	61.1			766	9	1477	104
1072	8	509.13	12.13	364	3	46.8	1.3	1736	13	545	2	491	6	274.8	3.7			766	12	1478	15
1073	15	509.6	10.5	365	5	46.8	1	1738	16	545	2.5	491	7	275	0			767	9	1478	34
1074	11	509.7	5.55	365	4	46.82	0.73	1738	13	545	36	491	10	275	15			768	4	1479	103
1074	18	509.7	13.7	365	2	46.83	1.84	1739	23	545.45	11.62	491	8	275	0			769	7	1479	61
1074	10	509.83	6.01	366	13	46.9	1.1	1739.4	16.95	545.5	3.15	491	8	275	4			770	9	1480	24
1075.78	28.69	510	3	367	3	46.9	1.1	1740	32	545.6	2.75	491.1	17.2	275	4.5			770	9	1483	68
1076	31	510	34	367	5	46.9	0.8	1740.5	17.9	545.8	4.85	491.2	13.6	275	5			770	8	1485	57
1076	33	510	9	367	8	46.9	0.9	1741.3	45.75	546	4.5	491.42	3.92	275	2.5			770	12	1487	23
1077	15	510	5	368	4	46.9	0.8	1742	6	546	3.5	491.6	0	275	2			772.7	7.2	1487	57
1077	12	510	8	368	4	46.9	1.7	1744	22	546	5.5	491.64	10.31	275.3	8.5			773	9	1487	20
1077	12	510.09	5.63	369	4	46.9	2.3	1744	15	546	7	491.7	16	275.3	9			774	4	1489	24
1077	41	510.2	4.4	370	12	46.93	0.97	1744.1	33.65	546	6	491.72	19.28	275.3	3.5			775	9	1491	122
1077.37	19.11	510.24	6.58	370	8	46.94	2.45	1744.9	31.1	546	8	491.9	9.5	276	0			775	27	1491	57
1078	14	510.3	10	370	2	46.94	1.23	1745.7	36.35	546	3	492	1.5	276	3			775	8	1493	9
1080	23	510.4	3.95	370	12	46.98	0.8	1745.9	36.5	546	6.5	492	5	276	0			779	10	1493	25
1081	28	510.5	14.7	372	2	47	0.83	1747.6	20.15	546.1	2.6	492	5	276	0			779	7	1493	42
1083	13	510.52	4.14	373	5	47	1	1748	5	546.21	11.02	492	6	276	1			780	11	1493	18
1083	9	510.88	19.11	373	4	47	2	1749	0	546.72	8.04	492	6	276	3			780	18	1493	58
1083	88	510.9	4.15	373	12	47	1.7	1749.7	43.4	546.8	18.95	492	5	276	2			781	13	1493	29
1084	18	511	5	373	4	47	1.3	1751	11	546.8	2.8	492	15	276	4			781.5	21.2	1499	20
1084	31	511	11	375	4	47	1	1751	70	547	10	492	15	276	1.5			782	9	1501	66
1085	19	511	7	375	5	47	1	1751	0	547	10	492	21	276.3	4.9			782	7	1501	49
1085	13	511	6	375	4	47	1.9	1754.4	28.1	547	10.5	492	8	276.8	13.8			782	8	1501	38
1085	16	511	6	375	5	47	0.39	1755	5.7	547	4.5	492	8	277	0			782	7	1501	32
1086	18.93	511.19	10.24	375.7	2.75	47.02	0.65	1755.3	18.2	547	8	492.3	10.4	277	4.5			782.1	36.9	1502	39
1086	13	511.24	6.07	376	4	47.05	0.84	1755.4	77.4	547	5.5	492.4	15	277	5			782.4	10.2	1502.35	10.2972
1086	12	511.27	3.68	377	4	47.09	0.72	1756	18	547	5	492.52	19.33	277	1			783	15	1504	33
1086	11	511.3	6.8	377	4	47.09	0.83	1756.8	22.9	547	5	492.9	12.9	277	9			785	10	1504	45
1087	27	511.5	13.9	377	4	47.1	1.6	1757	31	547	12	493	6	277	3			785.8	37.8	1504	15
1088	17	511.61	6.23	377	5	47.1	2.3	1758	11	547	6.5	493	14	277	3			786	10	1504	54
1088	11	511.9	6.5	377	5	47.1	1.2	1759	6	547	32	493	9	278	18			786.2	22	1504	14
1088	35	512	6	377	8	47.1	1.5	1760	13	548	0	493	8	278	0			788	24	1505	18
1089	10	512	16	377.2	10.1	47.1	1.6	1760.9	17	548	5.8	493.21	6.16	278	5			788.1	6.3	1505	20
1089	8	512	6	379	4	47.13	0.9	1762.4	30.9	548	4	493.4	6.2	278	13			789	7	1505	42
1090	11	512.1	5.5	379	21	47.13	0.8	1763	5	548	11	493.5	9.4	278	6			789	20	1506	10
1091	14	512.68	5.51	381	8	47.13	0.65	1764.3	35.2	548	4	493.9	26.8	278	7			789.9	0	1506	47
1091	14	513	8	381	8	47.16	0.99	1765.7	22.55	548	2.5	493.94	5.35	278	3			791	8	1506	72
1091	16	513	6	381	2	47.2	1	1766	13	548	11.5	494	5	278.1	11			792	12	1506	75
1091.38	28.26	513	7	381	2	47.2	1.2	1767	16	548	4	494	5	278.2	4.1			793	13	1506	54
1091.42	12	513	6	382	13	47.2	6.2	1768.4	13.3	548	3.5	494	14.5	278.5	2.7			795	12	1506	13
1092	8.5	513	5	384	6	47.2	1.5	1768.4	31.6	548.09	11.44	494	10	278.5	2.7			798	5	1506	28
1092	28	513	13	384	45.8	47.2	1	1768.5	33.4	548.1	5	494	6	279	3			798	15	1507	21
1092	35	513	7	384	5	47.2	2.2	1769.5	21.4	548.3	12.14	494	29	279	2.9			799	9	1507	58
1093	55	513.4	3.05	385	4	47.2	0.8	1770	22.85	548.7	4.9	494.09	8.81	279	0			800	22	1507	26
1094	11	513.7	5.44	385	5	47.2	2.3	1770.2	28.4	549	8	494.32	5.39	279	0			802	10	1507	97
1094	18	513.8	13.9	386	4	47.2	1	1770.8	25.6	549	10.5	494.7	24.5	279	6			803	4.5	1508	40
1096	11	513.81	16.79	386	8	47.2	0.84	1771	0	549	5	494.7	14.5	279	5			803	10	1508	11
1096	30	514	2	387	7	47.21	0.88	1773	80	549	5	495	10	279	7			805	8	1508	43
1097	13	514	7	387	4	47.23	0.91	1774	0	549	10	495	5	279	21			806	7	1509	79
1097	35	514	11	387.1	5.9	47.27	0.76	1775	18	549	2	495	8	279	8			806	10	1509	22
1098	13	514	8	387.7	31.4	47.3	1.1	1775.6	36.3	549	1.55	495	12	279.1	4			807	9	1510	38
1099	14	514	8	389	3	47.3	1.9	1775.9	20.55	549.1	3.4	495	9.7	279.1	2.1			808	11	1510	33
1099	13	514	14	390	4	47.31	1.38	1776	57	549.3	3.3	495	17	279.1	3.7			808.99	10.22	1511	10
1099	30	514	7	391	5	47.36	1.51	1778	0	549.4	2.75	495	10	279.3	2.15			810	9	1511	55
1099	28	514	6.9	391.8	7	47.4	1	1778	0	549.52	11.31	495.46	6.87	279.6	2.9			810	8	1511	177
1100	13	514	5	392	18	47.4	0.7	1779	0	549.6	1.85	495.6	1.9	280	1			812	8	1512	107
1101	13	514	11	393	6	47.4	0.8	1780.6	21.8	549.8	6.5	496	5	280	1.5			812	9	1512	18
1101	12	514.21	6.79	394	4	47.4	0.9	1781	29.85	549.99	7.86	496	4	280	1			812	5	1513	74
1101	11	514.69	10.91	394	6	47.4	1.1	1782	19	550	2.5	496	6	280	3			813	7	1513	108
1101	27	514.7	9.85	395.5	6.5	47.4	2.4	1783.4	9.15	550	2.5	496	6	280.8	2.4			815	9	1513.29	20.069
1102	11	514.9	10.4	397	5	47.46	0.92	1784	12	550	9	496	7	281	0			816	6	1515	6.5
1103	10	515	9.85	397	14	47.46	0.83	1784	45	550	9	496	8	281	1.5			817	11	1515	48
1103	18	515	9	398	4	47.5	0.8	1785.5	18.7	550	8.5	496	24	281	2			818	12	1515	70
1103	27	515	5	398.9	8.9	47.5	1.1	1786	10	550	9	496	7	281	6.5			818	9	1515	59
1104.26	19.36	515	19	399	9	47.5	2.8	1786	0	550	7	496.2	19.5	281	16			818	8	1515	20
1104.64	11.9	515	5	399	11	47.5	1.5	1787	9	550	3.5	496.2	22.8	281	7			818	9	1516	78
1105	23	515	9	400	4	47.5	0.8	1787	23	550	6	496.9	4.5	281.3	4.25			818.3	20.3	1517	32
1106	10	515	7	403	7	47.5	1.9	1787	0	550.5	9.59	496.9	16.7	281.7	4.6			819	9	1517	111
1106	8	515	9	403	4	47.52	0.64	1789	12	550.6	5.55	497	8	281.7	8.8			819	10	1517	79
1107	13	515	9	403	4	47.54	0.96	1790.2	18.6	550.8	2.65	497	9	281.8	11.6			820	8	1517	48
1107	33	515.1	20	404	8	47.58	0.74	1791	20	551	10	497	7	281.9	13.1			821	10	1517	44
1107	42	515.21	5.71	407	5	47.6	1.5	1791	0	551	3.5	497.1	14.1	282	4			821	7	1517	132
1107.6	11.4	515.25	6.89	409	6	47.6	0.8	1791.6	49.6	551	10	497.1	11	282	4			822	9	1519	49
1108	15	515.3	29.2	409	13	47.6	1.4	1794	13	551	9.5	497.5	10.4	282	5			823	7	1519	25
1108	29	515.3	3.75	409	2	47.6	2.1	1794	0	551	5.5	497.51	7.41	282	20.9			823	8	1521	63
1108	26	515.3	5	410	10	47.61	0.72	1794.4	25.15	551	3	497.7	20.08	282.6	2.7			823.44	10.96	1522	42
1108.7	64.8	515.74	4.14	411	4	47.61	9.41	1794.8	14.2	551	116	497.7	1.5	282.8	3.1			824.5	44.4	1523	197
1109	29	515.9	12.4	412	4	47.63	1.39	1795	4	551	4	497.8	15	283	4			825	12	1523	64
1110	13	516	12	414	9	47.66	0.62	1796	13	551	5.15	497.9	15.7	283	5.5			825	8	1523	50
1110	28	516	3.4	414	10	47.66	0.99	1796	0	551.38	8.84	498	4	283	4			825	8	1523	58
1111	27	516	9	414.2	3	47.69	1.19	1797	7	551.6	9	498	7	283.2	6			825	7	1523	62
1111	20	516	6	415.9	13.3	47.7	0.7	1797	9	551.9	4.2	498	7	283.4	3.85			826	10	1524	35
1111.93	24.5	516	11.5	417	5	47.7	1.1	1798	4	552	7.5	498	10	284	3.5			826	8	1524	34
1112	12	516	13.7	417.6	8.7	47.7	1.5	1798.6	21.85	552	7.5	498	26	284	4			826	9	1524	6
1112	19	516	9	418	14	47.7	1	1799	14	552	3	498.2	10.7	284	3			826	11	1524	69
1113.02	19.92	516.2	6.3	420.2	9	47.7	1.3	1800.2	26.4	552	5	498.6	12.2	284.3	3.7			826	10	1525	8
1114.4	17.21	516.3	8.5	421	12	47.7	0.7	1800.2	44.4	552	5	498.9	1.6	284.4	4.7			826	9	1525	50
1115	12	516.5	20.4	421.6	2.8	47.71	0.82	1801	0	552	8	499	17	284.6	3.45			827	7	1525	228
1116	13	516.7	14.7	422	14	47.73	0.77	1801.6	11.9	552	8	499	17	285	1.4			828	11	1526	48
1116	13	516.8	8.2	422.4	7.2	47.74	0.58	1802	20.5	552	6	499	8	285	2			828.69	18	1527	40
1117	14	516.9	6.5	425	4	47.75	0.96	1802	0	552.2	6.65	499	7	285	6			829	12	1528	54
1119	15	517	6	426	7	47.77	0.86	1802.9	15.45	552.4	2.65	499	28	285	3			831	9	1528	41
1119	13	517	7	426	2	47.8	1.3	1805	9	552.4	2.75	499.08	6.37	285.9	16			831	12	1528	67
1119	14	517	11	429	5	47.8	1.1	1805	14	552.8	3.85	499.1	39.9	286	4			831	8	1528	60
1119	51	517	4	430	6	47.8	1.5	1805	34	553	10	499.2	19.5	286	0			831	8	1529	12
1119	30	517	6	431	5	47.8	1.4	1806	28	553	7	499.3	10.4	286	0			831	11	1529	45
1119.36	11.82	517	7	431	8	47.8	0.7	1806.6	45.3	553	3	499.34	11.12	286	3			832	10	1529	55
1119.74	19.34	517	5	432	3	47.82	0.78	1807	18	553	6.5	499.6	11.7	286.1	5.8			832	9	1530	63
1120	29	517	10	434	6	47.88	1.09	1808.2	22.25	553	9	499.7	14.4	286.9	31.9			832	7	1530	49
1121	13	517	7	434	4	47.88	0.77	1808.4	18.5	553	4	500	8	287	0			832.92	18.16	1530	43
1121	23	517.2	14.6	434.8	12	47.9	1.1	1808.7	52	553	8.5	500	8	287	0			833	9	1531	84
1121	216	517.5	8.1	435	42	47.9	0.8	1808.8	16.1	553	11	500.03	5.43	287	0			833	9	1531	13
1121.89	19.86	517.6	3.2	437	4	47.9	1.3	1809	31	553	11	500.2	10.4	287	1			833.91	24.02	1532	61
1122	16	517.86	14.37	437	5	47.9	1.1	1809.5	23.1	553	14	500.4	15.3	287	3.5			834	15.9	1532	50
1122	18	518	5	438	17	47.9	1.2	1809.6	12.55	553	5	500.42	6.92	287	9			834.67	14.96	1532	28
1123	15	518	5	439	4	47.9	2.6	1810.6	19.8	553	3.75	500.6	19.13	287	6			835	17	1533	42
1123.62	21.38	518	3	441	5	47.9	1.4	1811.6	12.7	553.4	2.65	500.8	13.86	287.1	8.4			836	10	1533	59
1125	12	518	3	441	10	47.9	1	1814	19	553.8	2.05	501	5	288	6			837	8	1535	47
1125	15	518	13	441.3	7.1	48	0.48	1816	9	554	2.5	501	5	288	0			837	8	1535	89
1125	15	518	9	443.2	11.5	48	2	1816	16	554	11	501	6	288	1			837	14	1535	41
1125	14	518	6	443.3	10.4	48	1.1	1816	0	554	8	501	10	288	1			839	14	1536	11
1125	28	518	11	444	3	48	0.8	1817.8	35.2	554	3.5	501	7	288	4			839	11	1537	43
1125.3	20.45	518	14	444	12	48	1.2	1817.9	46.7	554	17	501	18	288	9			840.5	25.1	1538	102
1126	33	518	6	446.3	9.3	48	1	1818	21	554.1	5.25	501	7	288	9.5			841	8	1538.9	33.5
1126.66	11.88	518	6	448	5	48	3	1819	0	555	3.5	501.1	7.5	288	4			841	4.5	1540	45
1127	13	518.06	6.38	448	5	48	1	1820	9	555	6	501.2	14.7	288.5	5.7			842	4.5	1540	45
1127.31	24.12	518.1	4	449	4	48	1.7	1820.7	18.7	555	3	501.3	21.3	288.5	6			842	7	1541	47
1128	28	518.3	6.35	449	4	48	1	1821	19	555	8	501.31	13.62	289	7			842	21.7	1543	51
1130	73	518.39	13.1	450	5	48	1	1821	0	555	3.5	502	10	289	3			842	8	1543	179
1131	13	518.5	3.05	450	5	48	1	1822.3	31.3	555	8.5	502	8	289	4			843	13	1543	8
1131.95	20.65	518.6	2.5	450	6	48	1.3	1823.6	21	555	11	502.1	8.3	290	0			843	7	1543	804
1132	14	518.7	8.6	451	5	48	4	1823.7	20.4	555	5	502.25	11.07	290	0			844	8	1543	93
1132	32	518.7	2.65	452	6	48	2	1823.7	33.95	555	94	502.5	24.8	290	8			845	9	1544	47
1133	22	518.96	6.31	452	6	48	1	1825	53	555	5.5	503	10	290	7			845	10	1544	103
1133	13	519	5	453	5	48	0.5	1825	0	555	11	503	5	290	4.5			845	12	1544	31
1133	24	519	12.1	455	4	48.01	0.84	1825	0	555.1	2.75	503	20	290	5			845.3	20.6	1544	82
1133	15	519	7	455	7	48.03	1.15	1825.1	22.75	555.2	5.05	503	10	290	15			847	11	1545	51
1133.7	15.94	519	16	455	4	48.04	0.86	1826	0	555.7	3.45	503.1	2.4	290	8			848	9	1545	74
1133.72	25.75	519	13	457	7	48.05	0.91	1827	0	555.7	2.65	503.1	10.4	290.2	7.7			850	10	1545	45
1134	23	519	7	457	51	48.05	0.74	1827.7	47.4	556	9	503.15	5.97	290.6	5.3			850	9.3	1545	119
1134	25	519.3	6.2	457	30	48.08	0.75	1828	0	556	9.5	503.6	19.5	290.6	4.1			850	10	1546	24
1135	11	519.51	8.26	457.1	9.6	48.09	0.69	1828.3	24.85	556	12	503.8	13.8	290.6	5.9			851	12	1546	33
1135	29	519.6	5.6	458	2	48.1	0.7	1829	0	556	9.5	503.8	11.7	291	0			851	12	1546	138
1136	32	519.7	7.85	458.3	9	48.1	1.5	1829	0	556	3	503.8	21.1	291	4			851	10	1547	46
1137	11	520	5	459	5	48.1	1.5	1829.4	25	556	5	503.8	0	291.6	3.2			851.4	15.77	1547	58
1139	14	520	5	459	2	48.1	1.4	1830	0	556	5	503.9	21.1	292	4			852	15	1548	10
1139.73	27.5	520	9	459.4	6.2	48.1	2.9	1830.1	90.2	556	2.5	503.94	5.9	292	5			852	10	1550	70
1140	14	520	6	460	5	48.11	0.86	1831.2	28.7	556	9	504	5	292	10			854	9	1550	58
1140.35	16.73	520	9	460	6	48.12	0.69	1831.8	41	556	19	504	5	292	4			854	8	1550	21
1140.4	9.6	520	9	460	6	48.12	0.85	1832.7	22.85	556	4	504	5	292.5	3.8			855	8	1550	84
1141	23	520.1	3.75	460	32	48.17	0.88	1836	0	556	20	504	12	293	0			857	12	1551	62
1141	18	520.2	14.5	461	6	48.18	0.75	1838	0	556	4	504	11	293	16			857	12	1551	31
1141	31	520.25	7.43	461	18	48.2	1.2	1838.4	36	556.4	2.65	504	21	293	0			858	10	1551	47
1141	29	520.45	6.55	462	5	48.2	1	1838.8	30	556.4	2.45	504	10	293.3	12.7			858	9	1551	60
1141.56	18.31	520.8	13.2	462	5	48.2	1.4	1840	8	556.5	3.15	504	9	293.8	5			859	11	1552	50
1142	22	520.91	5.8	462	7	48.2	2.7	1840.8	20.1	557	9.5	504.12	6.42	294	5.5			860	12	1552	8
1142.4	9.2	521	5	462	7	48.2	1.5	1840.9	27.7	557	12	504.2	0	294	1			861	15	1552	24
1143	46	521	3	462.8	11.8	48.2	1	1841	10.7	557	5	504.3	13.8	294	8			861	8	1553	69
1143	31	521	5	463	19	48.2	1.01	1841.9	25.3	557	8.5	504.67	5.51	294	4			862	10	1553	66
1143	50	521	10	464	5	48.2	0.85	1842.3	13.2	557	18	504.85	27.84	294.1	4.9			862	9	1553	28
1144	16	521	5	465.7	2.2	48.2	1.22	1843.1	20.1	557	10	505	6	295	6			862	8	1554	826
1144	15	521	4.9	466	17	48.23	1.27	1843.3	49.8	557.3	3.7	505	12	295	4.5			863	12	1555	78
1144	13	521	6	467	6	48.27	1.35	1843.8	19.2	557.34	9.52	505	3	295	4.5			863	13	1555	87
1144	13	521	7	467	5	48.28	1.18	1844	19.3	557.49	8.97	505	5	295	9			864	20	1556	62
1144.62	14.88	521	7	467	22	48.28	1.13	1844.1	26.05	558	4	505	5	295	12			864	7	1556	9
1145	22	521	5	469	6	48.28	0.92	1844.6	31.95	558	8	505	8	295.5	3.2			865	15	1557	37
1146.91	22.41	521	6	470	5	48.3	1.3	1844.9	48.7	558	3.5	505	8	295.6	7.5			865	9	1557	107
1147	22	521.08	5.59	470	4	48.3	2.3	1845.7	37.1	558	4	505.1	6.8	295.6	8			865	10	1557	26
1147	12	521.2	11.2	470	11	48.3	1.2	1846.6	49.9	558	7	505.26	15.81	295.9	2.9			865	9	1558	86
1147	27	521.4	5.7	471	6	48.4	2	1846.8	89.8	558	4	505.3	14.4	296	4.5			866	8	1559	105
1148	24	521.44	7.25	471	6	48.4	1	1846.8	16.9	558	10	505.67	8.55	296	3			866	9	1559	144
1148	12	521.7	11.8	471.1	6.2	48.4	1	1848	0	558	3	505.91	5.35	296	2			866	10	1559	72
1148	14	521.8	5.2	473	5	48.4	2.3	1848	0	558	1	506	15	296	2			869	8	1559	59
1148.48	15.82	522	6	474	7.8	48.4	0.76	1848	0	558	54	506	4	296	2.5			869.5	21.6	1559	96
1149	18	522	10	475	5	48.41	0.63	1848	0	558	3.5	506	5	296.8	2.9			870	9	1559	91
1149	78	522	18	475	10	48.41	1.27	1848.1	25.2	558	9	506	5	296.8	27.3			870	9	1560	21
1151	12	522	17	475.3	11.3	48.43	0.86	1848.7	37.8	558.5	2.7	506	18	297	0			871	10	1561	39
1151.72	15.07	522.2	6.7	476	6	48.49	0.86	1848.9	13	558.5	3.2	506	18	297	0			871	8	1562	72
1154.07	36.57	522.38	4.41	476	6	48.5	0.6	1849.2	37.6	558.6	7.1	506	8	297	4			872	34	1562	47
1155	16	522.4	3.4	477	5	48.5	1.3	1849.5	21.4	559	8	506	7	297	5			872	9	1562	31
1155.89	24.03	522.8	4.3	477	6	48.5	0.7	1849.8	15.1	559	4	506	6	297	14			873.5	9.9	1562	50
1157	13	522.93	6.02	478	4	48.5	1.2	1850	13	559	11	506.13	7.6	297	3			874	8	1563	36
1158	31	523	5	478	5	48.5	1.6	1850.5	55.3	559	8	506.2	18.3	297.2	2.9			874	11	1564	6
1158	28	523	6	478	5	48.5	2.9	1851	68.9	559	9	506.3	4.7	297.6	4.1			874	6	1564	48
1158.84	24.14	523	16	478	4	48.5	1.3	1851	0	559	6	506.3	2.5	298	4			874.4	0	1564	40
1158.89	24.75	523.1	4.75	478	28	48.5	1.2	1851.8	18.9	559	10	506.35	9.6	298	3			875	15	1565	66
1159	12	523.2	6.1	478.4	7.7	48.53	1.31	1852	19.3	559	7	506.4	13.9	298.9	2.9			876	11	1565	32
1159	11	523.3	9.1	480	5	48.54	0.85	1852	0	559	9.5	506.7	17.6	299	7			877.5	19.6	1565	44
1159	23	523.3	13.3	480.4	7.3	48.55	7.06	1852.4	22.4	559	9	506.8	21.3	299	1.5			877.8	37.2	1567	57
1159	13	523.5	5	481.2	5.5	48.56	0.63	1853	0	559	10	507	10	299	3			878	5	1567	42
1159	17	523.9	4.65	482	6	48.6	1.3	1853	0	559	17	507	11	300	14			879	8	1569	117
1159.67	20.4	523.9	6.7	482	6	48.6	0.6	1853.2	26.4	559	16	507	9	300	3			879	8	1570	11
1159.91	19.69	523.95	13.89	482	5	48.6	1.4	1853.4	26.1	559	75	507	13	300	0.5			879	15	1570	36
1160	16	524	5	482	11	48.6	2	1853.4	45.7	559	47	507	10.9	300	3.5			879	8	1570	78
1160.39	19.28	524	5	483	4	48.6	1.6	1853.7	34	559	7.85	507	15	300	3			879.5	8.8	1571	83
1161	15	524	36	483	6	48.6	1	1854	0	559.1	2.7	507	7	300	2.5			879.7	16.7	1571	46
1161	11	524	10	484	5	48.6	0.9	1854.7	37.2	559.2	7.4	507.1	5.47	300	3.5			880	7	1572	78
1161	31	524	8	484	5	48.6	0.8	1855	13.3	559.2	2.85	507.15	10.14	300	8			880	10	1572	31
1161	12	524	9	484	4	48.6	2.3	1855.2	30.9	559.26	8.57	507.48	6.94	300	7			880.1	17.4	1573	125
1162	11	524	5	485	5	48.6	1.3	1855.5	22.25	559.3	2.7	507.5	4.1	300.6	23.5			881	8	1573	52
1162	13	524	7	485	5	48.6	0.94	1855.7	47.7	559.7	3.65	507.5	20	300.8	2.9			881.6	12.4	1573	51
1163	88	524	8	485	19	48.61	1.29	1856.2	12.2	559.8	2.7	507.5	15.2	301	0			881.9	28.4	1574	41
1163	51	524	5	485.2	6	48.63	0.75	1856.4	20.9	559.96	8.29	507.8	15.4	301	3.5			882	10	1574	32
1164	15.7	524.1	8.5	485.5	8.7	48.68	0.83	1857	7	560	12	507.9	8.5	301	3			882	10	1574	33
1165	15	524.12	8.53	486	6	48.7	1	1857	0	560	11.5	507.98	13.66	301	4.5			882	5	1575	54
1165.37	22.27	524.13	10.3	486	10	48.7	1.2	1857.2	19.4	560	4	508	6	301	6.5			882	11	1575	41
1166	16	524.13	4.21	487	9	48.7	0.7	1857.3	12.3	560	12.5	508	7	301	3			882.1	21	1576	49
1166.54	25.47	524.5	13.76	487	6	48.7	0.7	1857.5	34.2	560	12.5	508.22	6.59	302	7			882.9	40.4	1577	828
1167	25	524.65	6.02	487	5	48.7	0.7	1858	0	560	14	508.3	3.1	302	5			883	9	1578	40.5
1167	18	525	5.1	487.5	2.2	48.7	1	1858.1	63.8	560	3	508.6	10.7	302	2			883	8	1579	16
1167.05	17.4	525	5	488	6	48.7	2.18	1858.4	19.1	560	18	508.6	9.3	302	3.5			885	15	1580	41
1167.57	21.3	525	5	488	5	48.73	0.96	1859	19	560	12	508.7	1.5	302	2			885	9	1580	63
1168.14	11.89	525	5	488	5	48.77	0.99	1859	0	560	4.5	508.7	16.6	302	4.5			885	11	1580	35
1168.8	16.49	525	6	488	5	48.77	1.03	1859.2	21.4	560	11	509	6	302.2	9.5			885.8	35.1	1582	17
1169	26	525	8	488	8.2	48.8	0.59	1859.7	26.9	560.9	5.15	509	8	303	3.1			886	10	1582	42
1169.93	20.7	525	5	488	14	48.8	1.3	1859.8	33.6	561	7	509	7	303	2			886	13	1583	13
1171.35	20.5	525	5	489	6	48.8	1.4	1860	23	561	9	509.1	15	303	5.5			886	11	1583	43
1172	15	525	7	489	7	48.8	0.7	1860.1	19.25	561	11	509.2	27.5	303	3			886	11	1583	12
1172	13	525.1	4.25	489	26	48.8	1.7	1860.4	29.6	561	5	509.28	6.24	303	3			887	13	1583	92
1172.74	19.27	525.71	9.47	489.4	8.1	48.8	0.9	1861	10	561	3.5	509.56	20.57	303.2	1.1			887	10	1584	6
1173	38	525.9	10.3	490	5	48.8	2.7	1861.5	43.2	561.3	2.7	509.7	21.2	303.6	2.15			887	11	1584	37
1174	13	526	5	490	8	48.8	1.2	1862.2	18.6	561.4	9.4	509.8	11.6	303.6	3.95			887.7	21.3	1584	50
1174	25	526	3	490.1	8.1	48.8	1.5	1862.5	35.9	561.4	2.75	509.95	5.8	304	8			888	10	1584	40
1174.29	20.62	526	7	491	5	48.8	1.3	1862.8	52.7	561.7	6.6	510	5	304	0			888	12	1584	107
1175	23	526	6	491	6	48.82	0.75	1863.4	19.47	561.8	2.95	510	12	304	2			889	12	1585	85
1175	16	526	11	491	11	48.85	0.77	1863.8	19.5	561.8	3.65	510	6	304	5			889	8	1585	39
1175	12	526.4	13.7	492	5	48.88	0.66	1864	0.5	561.8	4.1	510	5	304.2	2.45			889	10	1585	48
1175.04	16.92	526.7	18.3	492	7	48.89	0.91	1864	0.5	562	9.5	510	5	304.2	5.9			889.7	17.3	1585	33
1175.32	24.66	526.98	6.1	492	11	48.89	0.95	1864.1	13.2	562	8.5	510	5	305	0			892	11	1586	30
1175.62	23.91	527	7.2	492	17	48.9	2.8	1864.7	19.9	562	5.5	510	8	305	2			892	43.9	1586	12
1175.63	15	527	5	492.9	7	48.9	1.5	1866.1	35.7	562	5	510	10	305	7.5			893	9	1587	28
1175.7	17.06	527	5	493	7	48.9	1.2	1866.9	19.8	562	17	510.1	11.7	305	7.5			893	8	1587	75
1175.89	28.41	527	8	493	6	48.9	2.1	1867	0.5	562	3.5	510.79	3.39	305	6			893.1	24.3	1587	115
1176	99	527	10	493	3	48.9	1	1867	0	562	90	510.84	5.37	305	4			893.3	15.4	1587	57
1177	16	527	5.6	493	38	48.9	1.5	1867.5	66.7	562.1	7	511	5	306	0			895	9	1588	56
1177	9	527	9	493	35	48.9	1.5	1868	0.5	562.32	7.23	511	6	306	0			895	8	1588	32
1177	107	527	10	493.5	8.8	48.9	1.9	1870	30.6	562.7	2.7	511	5	306	3			895	9	1588	6
1177.12	24.5	527	16	493.7	5.7	48.9	1.5	1870	1	562.79	9.11	511	12	306	3			895	10	1588	75
1178	33	527	6	493.9	8.5	48.9	1.3	1870	1	563	11	511	8	306	4			896	5	1588	11
1178	41	527	5	494	7	48.93	0.99	1870.5	18	563	0	511	9	307	4			896.2	11.3	1588	17
1180	26	527.16	10.8	494	5	48.94	1.09	1871.7	19.2	563	8	511	9	307.1	19.3			897	10	1589	27
1181.15	13.28	527.22	5.89	494	5	48.96	0.85	1872	20.6	563	11	511.1	15.8	307.1	5.1			898	10	1589	21
1183	67	527.3	6.75	494	11	48.97	0.76	1872	18	563	5	511.2	4	307.3	5.3			899.5	19.8	1590	97
1183.19	14.88	527.3	6.3	494	14	48.98	0.64	1872	0	563	9	511.35	20.08	308	10.5			900	10	1591	29
1183.91	19.39	527.34	7.4	494	11	48.99	0.68	1875	0	563	11	511.4	10.3	308	5			901	12	1591	72
1184	6	527.4	6.1	494	10	48.99	0.99	1875.6	79	563	5	511.5	4.7	308	6			902	10	1591	25
1184.61	17.34	527.52	9.14	494.1	7.7	49	1	1876	0	563	9	511.5	17.1	308	6			902	8	1591	31
1184.82	40.53	527.6	5.1	495	5	49	1	1877	69.4	563	5.5	511.6	23.6	308	4			902	10	1591.39	8.98459
1185	25	527.6	7.7	495	5	49	2	1878	0	563	12	511.7	6.6	308	3			903	8	1594	46
1185	15	527.86	8.98	495	11	49	2	1878.1	22.7	563	5	511.72	13.73	308.4	4.6			903	10	1594	54
1185	8	527.9	3.2	496	5	49	0.7	1878.4	15.25	563	2	511.79	20.18	309	1.5			903	11	1594	41
1186	15	527.95	6.53	496	8	49	1.5	1879	9	563	6	511.8	22.6	309	11			903	10	1594	44
1186.88	21.35	528	9.25	497	9	49	1.9	1879.2	45.1	563.5	2.7	511.85	22.27	309	6			903	9	1594	30
1187	33	528	7	497	11	49	2.2	1879.7	53.9	563.6	2.7	512	6	309	4			903	9	1595	83
1188.18	25.87	528	6	497.7	10.3	49	0.9	1880.2	38.95	563.8	4.6	512	5	309.4	7.6			904	9	1595	40
1189.23	26.16	528	12	498	11	49	1.2	1880.2	71	563.9	3.02	512	7	310	0			904	10	1595	36
1190	15	528	5	498	41	49	2	1880.6	19.3	564	7.5	512	7	310	0			905	11	1595	51
1191.06	22.31	528	13	498.5	9.6	49	1	1880.9	23.8	564	9	512	16.6	310	5			905.9	23.2	1595	25
1191.12	19.85	528.1	3.7	499	5	49	1	1881	0	564	10	512	25	310	10			906	12	1596	35
1191.37	26.4	528.3	4.5	499	6	49	2	1882.2	24.8	564	3.5	512	10	310	8			906.6	23.1	1596	15
1192.74	12.49	528.8	7	499	5	49	1	1883	15.3	564	5	512	7	310.1	9.6			907	11	1596	26
1193	13	529	4.85	500	6	49	1	1883	0	564	1	512.3	17.6	310.7	2.5			907	8	1596.16	18.3194
1193	24	529	5	500	8.5	49	1	1883.6	21.4	564.2	4.3	512.3	18.8	311	4.5			907	9	1597	52
1193	6	529	6	500	10	49	1.1	1884.2	30.7	565	4.5	512.42	7.57	311	2			907	8	1597	129
1195	15	529	6	500	3	49	2	1884.3	24.25	565	8	512.85	6.38	311	7.5			907	8	1597	65
1195	13	529	13	500	4	49	1	1884.4	22.4	565	5	512.9	24	311.3	14.3			907	8	1597	46
1197	16	529	7	500	14	49	1	1884.5	26.5	565	4.5	513	9	311.5	4.4			907	13	1598	27
1198	14	529	10	500.8	9.1	49	0.74	1885	12	565	5.5	513	9	311.5	17.6			908	10	1598	52
1198	17	529	5	501	5	49	0.49	1885	0	565	5	513	9	312	4			908	9	1600	50
1198	15	529	10	501	16	49	1.26	1885.9	64.7	565	11	513	10	312.7	12.6			908	9	1600	51
1198	17	529	11	502	5	49.02	1.67	1886.4	27.2	565	11	513	30	312.8	3.2			908	11	1600	35
1198	25	529.05	6.72	502	5	49.03	0.93	1887	21	565	11	513.1	13	313	0.5			909	4.5	1600	59
1198	15	529.1	7.2	502.2	22.8	49.03	0.62	1887.2	18.55	565	5	513.12	9.66	313	2.5			909	8	1601	90
1198.1	22.09	529.23	6.54	503	6	49.05	0.89	1887.6	16.7	565	1	513.3	27.9	313	2.5			909	8	1601	33
1198.17	13.93	529.5	5.65	503	6.9	49.06	0.86	1888	0	565	44	513.35	20.85	313	6			909	9	1601	43
1199	16	529.83	6.92	504	6	49.08	1.14	1890	5	565.1	5.55	513.43	7.23	313	6			909	9	1601	31
1200	23	529.86	5.55	504	4	49.1	1.5	1890	0	565.1	3	513.5	17.6	313	4			910	10	1601	23
1200	21	529.9	4.2	504.2	6.5	49.1	1.2	1890.6	40.5	565.1	2.95	513.6	15.6	313.1	4.3			910.7	25.8	1601	61
1200.58	22.89	530	8.1	505	6	49.1	3.7	1891	0	565.2	4.45	513.79	21.43	314	0			911	5.5	1601	137
1201	24	530	6	505	5	49.1	2.8	1891.2	38.1	565.31	8.34	513.8	9.2	314	5			911	9	1601	25
1201.61	21.64	530	5	505	7	49.1	1	1892.5	54.3	565.4	8.2	514	8	314	4			911	10	1601	17
1202	14	530	6	505	7	49.12	0.79	1892.6	28.8	566	9	514	5	314.9	5.8			912	9	1602	40
1202	18	530	7	505	6	49.13	1.41	1893.7	41	566	3.5	514	8	315	5			912	8	1603	78
1203	30	530	10	505	6	49.16	1.49	1894	8	566	3.5	514	7	315	8			913	49	1603	40
1203.05	13.26	530	7	505	5	49.17	0.8	1894	45	566	4.5	514	25	315.6	21.3			914	11	1603	9
1203.32	16.06	530	11	505.3	14.2	49.2	0.7	1894.1	43.2	566	10	514.4	2.4	315.8	4.5			914	10	1603	31
1204.16	14.84	530.1	9.35	506	11	49.2	1.2	1895	0	566	9	514.45	24.46	316	3.5			914	10	1603	52
1205	15	530.1	3.4	506	11	49.2	1	1895	0	566	3	514.48	13.99	316	4			914	9	1603	64
1205.62	13.1	530.1	4	506.8	6.5	49.2	1.1	1896	0	566	10	514.6	13.8	317	7			914	8	1604	33
1207	16	530.2	11.9	507	5	49.2	1.2	1896	0	566.2	4.85	514.7	9.9	317	4.5			914.4	25.8	1604	31
1207.35	13.57	530.5	7.8	507	6	49.2	0.8	1896.4	30.1	566.2	2.7	515	6	317	6.5			915	10	1605	39
1208	15	530.58	5.11	507.3	11.5	49.21	0.95	1896.5	30.2	566.3	4.05	515	6	317.4	3.6			916	10	1605	227
1208.77	29.55	530.7	15.2	508	11	49.22	0.72	1897	36.5	566.5	5.35	515	5	317.8	10.3			916	11	1605	22
1209	24	531	5	509	7	49.25	0.77	1897	0	566.6	3.04	515	7	318	0			916	10	1605.3	32.4
1209	17	531	5	509	26	49.28	1	1898.5	36.3	566.6	3.6	515	6	318	3			917	8	1605.9	23.3
1209	15	531	5	509	7.1	49.28	0.91	1899	0	567	12	515.2	15.7	318	7			918	8	1606	151
1209	15	531	13	510	6	49.3	0.9	1899.3	25.35	567	4	515.27	9.19	318	2.5			918	2	1606	130
1209	36	531	4	510	9.5	49.3	1.3	1899.6	33.3	567	7.5	515.3	13.6	318.5	21.2			919	11	1606	39
1210	15	531	9	510.9	8.8	49.3	2.2	1899.9	28.6	567	11.5	515.5	21.29	319	5			920	11	1606	38
1210	14	531	5	511	6	49.3	1.2	1900.3	30.6	567	19	515.6	9.5	319	4			921	12	1606.9	29.7
1210	17	531	6	511	6	49.3	2.4	1901	17.5	567	8	515.6	23.5	319.1	2.9			921	12	1607	36
1210	15	531	7	512	5	49.3	1.1	1901	21.05	567	2.5	515.74	20.74	319.2	3.6			921	9	1607	33
1210	74	531	11	512	6	49.3	0.83	1901.1	20.5	567	10	515.8	28.9	319.6	8.88			922	9	1607	8
1211	17	531.1	6.3	512	11	49.32	1.98	1901.3	14.1	567	10	515.88	19.71	319.7	20.2			922	10	1607	7
1211	17	531.4	4.75	512	19	49.33	0.76	1902.1	19.2	567	2	516	6	319.9	20.1			922	9	1607	80
1211	15	531.52	5.74	513	8	49.35	1.09	1902.5	46.9	567	3.5	516	6	320	0			922	9	1607	49
1211.57	17.21	531.63	6.52	513	6	49.35	1.02	1903	5	567	5	516	8	320	0			923	4.5	1607	17
1211.77	12.67	531.7	2.05	513	14	49.36	0.77	1903	0	567.52	12.11	516	16	320	0			923	10	1608	14
1212	18	531.81	9.18	513	16	49.39	0.93	1903.1	30.9	567.7	3	516	26	320	2			923.8	16.8	1608	50
1212	18	531.89	8	513	6	49.4	0.8	1903.4	39	568	9	516	4	320	5			924	10	1608	27
1212	24	531.9	5.35	513	4	49.4	1.1	1904.1	34.3	568	9.5	516	8	320	3			924	10	1608	8
1212.81	16.78	531.95	6	514.6	8.7	49.4	1.5	1904.8	27.8	568	5.5	516.02	12.55	320.2	6.5			924	8	1609	12
1213	16	532	67	515	6	49.4	0.9	1904.9	9.45	568	1.5	516.1	31.2	320.7	2.2			924	10	1610	49
1213	18	532	9	515	5	49.41	1.18	1905	37.6	568.18	6.1	516.2	15.5	321	4			924	20	1610	76
1213	15	532	7	515	5	49.44	0.66	1905	11	568.2	4.55	516.3	19.7	321	13.1			925	10	1610	20
1214	49	532	11	515	11	49.46	0.61	1905.4	22.1	568.2	2.7	516.3	11.7	321	4			925	12	1612	59
1214	45	532	6	517	18	49.5	1.5	1905.9	17.85	568.5	3.05	516.4	21	321.1	3.8			925	15	1612	23
1215	14	532	9	518	5	49.5	2	1906.6	23.7	568.7	3.55	517	5	321.3	38.6			925	9	1613	63
1215.2	19.52	532	10	518	6	49.5	1.7	1907	0	569	9	517	5	321.4	8.7			925	9	1613	38
1215.97	25.64	532	10	519	10	49.5	1.2	1907.9	10.75	569	5.5	517	6	321.5	8			926.7	18.4	1613	25
1216	18	532	5	519	19	49.5	1.6	1908	0	569	11	517	7	321.5	13.35			927	12	1613	18
1216	33	532.28	6.5	519	19	49.5	0.9	1908	0	569	5	517	11	321.8	3.9			927.7	22.1	1614	46
1217	62	532.32	6.3	520	5	49.5	1.2	1911.6	21.45	569	1.5	517.1	2.2	322	7			928	8	1614	53
1218	18	533	5	520	10	49.5	1	1911.6	32.9	569	4.5	517.6	3.4	322	0			928.25	20.04	1614	110
1219	13	533	6	520	12	49.5	2.4	1912	37.5	569	5.5	517.8	13.2	322	0			928.67	23.89	1614	34
1219	15	533	5	520	14	49.51	0.87	1915	0	569	11	518	6	322.5	4.15			929	27.6	1614	45
1221	22	533	5	520	22	49.51	1.25	1915.2	19.6	569	11	518	5	322.5	10.1			929	19	1614	60
1222	22	533	4.5	520.7	3.15	49.53	1.21	1915.7	8.95	569	2	518	7	323.2	3.1			929.3	12.7	1614	30
1222	16	533	5	521	2	49.55	0.65	1916	33	569	7	518	5	323.4	10.9			929.8	18.7	1614	22
1222	31	533	15	521	19	49.56	0.74	1917.1	20.45	569	4.2	518	5	323.7	6.8			930	10	1614	16
1222.14	20.01	533	5	522	10	49.56	0.69	1917.8	52.6	569.1	3.01	518	3	324	2			930	9	1615	98
1222.44	15.64	533.04	7.41	522.2	11.7	49.57	0.8	1918.8	44.7	569.4	6.85	518	9	324	5.5			930	8	1615	25
1223	25.05	533.3	9.55	523	10	49.58	0.76	1919	0	569.5	4.2	518	3	324	8			930	10	1615	50
1225	100	533.5	20.3	523	23	49.58	0.92	1920	12	569.6	4.95	518	7	324	5.5			931	9	1615	39
1229	20	533.5	4.3	523.8	3.85	49.6	1.5	1920	0	569.8	2.75	518.2	28.7	324	4			931	9	1615	49
1231	18	533.7	3.75	524	12	49.6	1.1	1921.3	78.9	569.8	2.75	518.28	5.57	324	8			931	8	1616	34
1231	36	533.7	4.6	524	12	49.6	1.5	1921.5	45.4	569.97	8.13	518.34	6.64	324	4			932	10	1616	41
1232	18	533.9	3.05	524	10	49.6	1.7	1922.7	18.4	570	6.5	518.36	14.05	324.4	4.8			932	12	1617	81
1232	24	534	6	525	5	49.6	2.3	1923	0	570	9	518.4	4.9	324.5	24.2			932	10	1617	17
1233.76	28.99	534	7	525	7	49.6	0.7	1924	0	570	4.5	518.9	22.8	324.6	3.2			932	10	1617	43
1233.91	14.13	534	8	525	5	49.6	0.8	1925.4	25.35	570	5.5	519	5	325	1			932.3	10.9	1617	31
1234	29	534	12	525	15	49.6	0.66	1926	0	570	5	519	5	325	2			933	9	1617	47
1234.25	27.21	534	5	525	6	49.62	0.84	1926.7	26.5	570	6	519	12	325.6	18.9			934	9	1617	46
1235.13	17.18	534	5	525	7	49.62	0.91	1927	35	570	5	519	17	325.8	25.9			934	4.5	1617.78	14.3352
1236	25	534.15	5.98	526	2	49.64	0.7	1927.5	19.15	570	6	519	9	325.8	20.9			934	4.5	1618	33
1236.51	22.61	534.2	6.5	526	3	49.7	1.2	1928	12	570	3	519	61	326	4.5			936	17	1618	8
1238	20	534.2	2.55	527	5	49.7	1.7	1928	0	570	9.5	519.01	9.74	326	7			936.2	35.4	1619	11
1238.06	21.95	534.28	7.35	527	6	49.7	1.9	1930.2	21.5	570	6	519.1	6.8	326.1	8.9			936.4	18.5	1619	75
1238.26	23.69	534.3	6.35	527	70	49.7	1.1	1932	0	570	8	519.2	9.1	326.1	14.7			936.4	14.2	1619	41
1238.73	24.2	534.37	6.48	527	17	49.7	3.7	1932	0	570	13	519.3	15.8	326.3	6.1			937	13	1620	25
1239	16	534.6	10.4	527.1	11.9	49.7	0.6	1933	0	570	6	519.4	10.5	326.6	6.1			937	12	1620	34
1239.05	25.78	534.76	6.32	528	38	49.7	0.68	1933.4	19.45	570	81	519.4	22.7	326.7	3.2			937.1	8.6	1620	16
1239.67	26.36	535	36	528.5	8.8	49.73	0.77	1934.6	21.85	570	54	519.4	17.7	326.7	9.9			938	11	1620	16
1241	38	535	7	529	5	49.74	0.6	1936	7	570	4.6	519.85	6.72	326.8	6.8			939	44.5	1620	10
1242	25	535	5	530	5	49.76	0.87	1936.2	16	570	5	520	5	326.8	4.4			939	9	1620.11	6.39569
1242.38	21.65	535	5	530	47	49.77	0.66	1937	0	570.2	3.5	520	6	326.9	8.5			939	9	1621	42
1243.26	24.38	535	5	531	7	49.77	1.03	1937.4	22.1	570.2	10.8	520	11	327	7.5			940	9	1621	21
1244	20	535	5	531	5	49.79	0.94	1938	0	570.3	2.75	520	23	327	5			940	10	1621	33
1244	15	535	5	531	12	49.8	1	1940	0	570.6	0	520	17	327	1.5			940	37.1	1621	8
1245	24	535	3.5	532	40	49.8	1.3	1940.4	15.5	570.9	3.8	520	18	327	4			941	11	1621	29
1245	33	535	5	532	17	49.8	1.8	1940.4	27.9	571	5.5	520	16	327	5			941	8	1622	96
1245	24	535	8	533	7	49.8	1.7	1941	79	571	4.5	520	31	327.1	4.4			941	9	1622	19
1246	8	535	16	533	7	49.8	1	1941.4	15.9	571	15	520	16	327.3	6.4			942	8	1622	17
1246	32	535	7	533	4.3	49.8	0.73	1942	102.9	571	5	520.01	25.19	327.3	18.3			942	9	1622	32
1247	9	535	2	534	6	49.83	0.89	1942.3	27.9	571	5	520.04	9.08	327.31	2.5			942	8	1622	22
1247.43	16.4	535.2	2.95	534	5	49.84	0.62	1942.5	24.26	571	18	520.33	20.16	327.31	5.12			943	32	1622	99
1248	25	535.4	9.7	534.6	9.8	49.87	0.61	1944.3	34.4	571	5	520.4	4.6	327.5	4.7			943	9	1623	53
1250	18	535.68	6.26	535	8	49.87	0.92	1947	16	571	0	520.6	30.9	327.6	3.2			943	10	1623	74
1251	35	535.7	6.6	535	27	49.88	0.88	1948.6	44.35	571	4.5	520.7	3.9	327.6	17.1			943	10	1623	45
1252	25	535.83	6.69	536	6	49.89	1.16	1949	9	571	6.5	520.7	16.2	328	7			943	4.5	1623	21
1254	25	535.97	7.09	536	11	49.9	1.6	1950	0.5	571	12	520.9	3.8	328	4.5			944	4.5	1623	41
1254.79	28.88	536	4.9	536	6	49.9	1.4	1952.8	18.2	571	8	520.9	9.2	328	6.5			944	20	1623.8	31.3
1255.06	17.54	536	5	536	15	49.9	0.6	1953	0	571	6.5	521	5	328	4			944	8	1624	63
1256	23	536	7.25	536	3	49.9	0.9	1954.4	31.8	571.02	8.18	521	11	328.2	4.3			944.1	22.2	1624	52
1256	18	536	5	537	5	49.9	1.3	1955.2	16.9	571.1	2.5	521	7	328.3	7			944.36	15	1624	17
1256	24	536	5	537	12	49.9	2	1955.9	12.6	571.1	13	521	7	328.3	13.3			945	9	1624	51
1256	14	536	6	537	12	49.9	1.8	1959.7	11.5	571.2	13	521.2	19.4	328.3	15.9			945	8	1625	102
1256.39	17.74	536	8	537	17	49.9	1.4	1961.1	51.25	571.3	2.75	521.52	5.51	328.4	2.1			945	10	1625	33
1256.99	27.07	536	5	537.4	11.5	49.9	1.5	1964	9	571.41	12.22	521.6	14.77	328.5	3.9			945	13	1625	19
1257	68	536.04	27.75	538	15	49.9	1.2	1964.5	96.8	571.5	2.3	521.7	18.6	328.6	9.4			945.1	54.2	1625	79
1257.44	20.76	536.1	5.1	538	12	49.9	1.6	1965	0	571.5	2.95	521.7	20.2	328.8	7.5			945.7	20	1625	63
1258	18	536.1	14.9	538	13	49.9	1.68	1965.5	40.6	572	10.5	521.9	15.6	329	3			945.7	40.2	1625	78
1261	26	536.14	6.29	540	6	49.91	0.88	1969.3	28.25	572	6	522	5	329	3.5			946	10	1625	107
1261	27	536.35	7.81	541	7	49.91	0.83	1970	0	572	33	522	10	329	6			946	11	1625.53	7.17712
1261	16	536.7	5.7	541	11	49.91	0.8	1971.3	24.5	572	14	522	10	329	10			946	10	1626	11
1261	38	536.7	7.8	542	5	49.92	1.95	1971.5	31.3	572	8	522.5	12.9	329	6			946.3	23.4	1626	28
1263	51	537	10	543	6	49.93	0.68	1971.5	52.6	572	10	522.73	20.31	329.1	11.4			947	32.4	1626	8
1263.52	32.76	537	10	544.7	4.55	49.99	1.01	1972	23	572	4.5	523	7	329.3	8			947	11	1626	16
1264	26	537	8	545	6	49.99	1.1	1973.1	26.1	572	4	523	6	329.4	15.6			947	18.8	1626	5
1266.32	16.52	537	8	545	22	50	0.66	1975.4	26.4	572	10.5	523.2	12.1	329.6	12.6			947.6	7.9	1627	34
1266.52	28.99	537	6	546	6	50	1	1976	5	572	10	523.32	6.6	330	5.3			947.7	29.7	1627	28
1268	32	537	16	546	12	50	1.6	1976.2	15.05	572	1	523.4	55.3	330	5			948	11	1627	35
1268	12	537	6	546.3	11.5	50	0.8	1977.2	14.25	572.17	7.52	523.54	20.34	330	5			948	8	1628	36
1268	22	537	9	548	6	50	1	1978.7	12.1	572.5	2.85	523.65	11.78	330	6.5			948.5	14.9	1628	39
1268	26	537.1	22.4	549	6	50	0.92	1978.9	26.35	572.9	12.85	523.88	8.85	330	9			948.6	30.6	1628	5
1269	19	537.1	12.7	549	4	50	1.06	1979	70.2	573	5.5	524	6	330	6			948.8	40.6	1628	7
1271	68	537.38	6.86	549	49	50	0.72	1979	65	573	10	524	10	330.7	21.8			949	13	1628	13
1271	17	537.52	5.93	549	47	50.04	0.86	1980	4	573	9	524.2	23.9	330.8	2.45			949.5	18.1	1629	25
1272	13	537.6	8.7	550	9	50.08	1.53	1981	22.6	573	9	524.2	9.3	330.8	4.7			950	24.6	1629	29
1272	17	537.69	9.9	550	5	50.1	0.9	1981	10	573	6	524.22	4.57	330.8	19.6			950	14	1629	13
1274	19	538	9.8	550	12	50.1	2.6	1983	28	573	9	524.4	21.9	330.8	12			950	9	1629	234
1275.92	20.65	538	8	550	11	50.1	2.4	1984	0	573	3	524.5	15.2	330.8	15.5			950	14	1629	16
1276	11	538	7	551	12	50.1	1.7	1984.5	15.95	573	3	524.5	10.28	331	8			951	5	1630	39
1276.12	34.78	538	7	551	31	50.1	1.7	1985	0	573	1.5	524.7	20.53	331.5	3.2			951.5	76.4	1630	17
1277	20	538	5	552	5	50.15	0.6	1985.2	20.3	573	66	524.7	14.4	331.7	29.1			952	8	1630	24
1278	15	538	6	552	6	50.16	0.88	1988.6	17.7	573	3.5	524.92	5.45	332	26.3			953.5	14.8	1630	72
1278	22	538	7	552	6	50.2	1.6	1989	0	573.2	2.9	525	10	332	9			954	9	1630	6
1280	73	538	13	552	40	50.2	1.2	1991	42	573.2	6.4	525	5	332	7			954	11	1631	46
1281	28	538	15	553	22	50.2	1.2	1991	0	573.3	2.75	525	8	332.1	6.7			954.4	37.9	1631	10
1281	18	538.1	25.1	554	6	50.2	2.2	1991.6	15.85	573.3	7.15	525	10	332.5	22.6			954.9	17.8	1631	44
1282	13	538.15	6.46	554	11	50.21	1.03	1992	0	573.7	5.75	525	5	332.9	5.7			955.1	9	1631	59
1282	16	538.17	24.98	555	10	50.23	1.38	1995	14	574	0	525	18	333	4			956	9	1632	60
1282	31	538.4	9.7	556	7	50.26	1.49	1995.3	15.5	574	0	525	8	333	4			956	10	1632	6
1283	27	538.5	7.5	556	6	50.3	1	1995.7	30.65	574	12	525.1	19.6	333	2.5			956.9	21.9	1632	25
1283	20	538.63	6.18	556	6	50.3	1.4	1996.5	9.4	574	14	526	7	333.5	3.2			956.9	48.2	1632	8
1283	17	538.8	3.8	557	9	50.3	1.4	1999	11	574	6	526	18	333.5	12			957	12	1632	8
1284	16	539	5	557.1	6.9	50.3	1	1999.7	60.2	574	6	526.34	7.42	334	14.6			957	13	1633	60
1285	17	539	4	558	7	50.37	1.73	2000	0	574	5	526.4	16.2	334	3			958	12	1633	22
1287	30	539	6	558	6	50.4	1.3	2000.9	13.6	574	6.5	526.89	13.57	334	13.5			958	12	1633	5
1287	25	539	9	558	8	50.4	1.6	2003	39.5	574	0	526.9	38.2	334	9			958	8	1633	9
1287	17	539	8	558	25	50.4	1.2	2003.7	51.25	574	7	526.9	0	334.4	13.1			958.1	44.9	1633	31
1287	27	539	7.45	558.7	3.75	50.4	1.7	2007.4	20.75	574	4.5	527	21.9	334.5	6.3			959	9	1633	14
1290	18	539	22	559	5	50.4	1.4	2007.5	19.6	574	0.5	527	10	334.6	17.3			960	20	1634	38
1291	19	539	5	559	12	50.4	0.8	2010.1	20.25	574	14	527	24	334.7	5.9			960	9	1634	32
[truncated: 52,830 more rows]
